# Supplementary material for: Positive percentages of urine morphine tests among methadone maintenance treatment clients with HIV/AIDS: a 12-month follow-up study in Guangdong Province, China
Source: PubMed Central journal article supplement — BMJ Open. 2017 Apr 27;7(4):e014237. doi: 10.1136/bmjopen-2016-014237 (PMC5566940; doi:10.1136/bmjopen-2016-014237), 2017-04-27
Supplement: bmjopen-2016-014237.draft_revisions.pdf [file bmjopen-2016-014237.draft_revisions.pdf]

# BMJ Open

## Extremely High Heroin Use Rate among Methadone Maintenance Treatment Clients with HIV/AIDS in Guangdong Province, China

|                                 |                                                                                                                                                                                                                                                                                                                                                                                                                                                                                                                                                                                                                                                                                                                                                                                                                                                                                       |
|---------------------------------|---------------------------------------------------------------------------------------------------------------------------------------------------------------------------------------------------------------------------------------------------------------------------------------------------------------------------------------------------------------------------------------------------------------------------------------------------------------------------------------------------------------------------------------------------------------------------------------------------------------------------------------------------------------------------------------------------------------------------------------------------------------------------------------------------------------------------------------------------------------------------------------|
| Journal:                        | <i>BMJ Open</i>                                                                                                                                                                                                                                                                                                                                                                                                                                                                                                                                                                                                                                                                                                                                                                                                                                                                       |
| Manuscript ID                   | bmjopen-2016-014237                                                                                                                                                                                                                                                                                                                                                                                                                                                                                                                                                                                                                                                                                                                                                                                                                                                                   |
| Article Type:                   | Research                                                                                                                                                                                                                                                                                                                                                                                                                                                                                                                                                                                                                                                                                                                                                                                                                                                                              |
| Date Submitted by the Author:   | 16-Sep-2016                                                                                                                                                                                                                                                                                                                                                                                                                                                                                                                                                                                                                                                                                                                                                                                                                                                                           |
| Complete List of Authors:       | Luo, Xiaofeng; Sun Yat-Sen University, Faculty of Medical Statistics and Epidemiology, School of Public Health;Sun Yat-sen Center for Migrant Health Policy<br>Gong, Xiao; Sun Yat-Sen University, Faculty of Medical Statistics and Epidemiology, School of Public Health;Sun Yat-sen Center for Migrant Health Policy<br>Zhao, Peizhen; Guangdong Provincial Center for Skin Disease and STI Control<br>Zou, Xia; Sun Yat-Sen University, Faculty of Medical Statistics and Epidemiology, School of Public Health;Sun Yat-sen Center for Migrant Health Policy<br>Chen, Wen; Sun Yat-Sen University, Faculty of Medical Statistics and Epidemiology, School of Public Health;Sun Yat-sen Center for Migrant Health Policy<br>Ling, Li; Sun Yat-sen University, Faculty of Medical Statistics and Epidemiology, School of Public Health;Sun Yat-sen Center for Migrant Health Policy |
| <b>Primary Subject Heading</b>: | Addiction                                                                                                                                                                                                                                                                                                                                                                                                                                                                                                                                                                                                                                                                                                                                                                                                                                                                             |
| Secondary Subject Heading:      | Epidemiology, HIV/AIDS                                                                                                                                                                                                                                                                                                                                                                                                                                                                                                                                                                                                                                                                                                                                                                                                                                                                |
| Keywords:                       | Heroin Use, Methadone Maintenance Treatment (MMT), HIV, China                                                                                                                                                                                                                                                                                                                                                                                                                                                                                                                                                                                                                                                                                                                                                                                                                         |
|                                 |                                                                                                                                                                                                                                                                                                                                                                                                                                                                                                                                                                                                                                                                                                                                                                                                                                                                                       |

SCHOLARONE™  
Manuscripts

1  
2  
3  
4 1 **Extremely High Heroin Use Rate among Methadone Maintenance Treatment Clients with**  
5  
6 2 **HIV/AIDS in Guangdong Province, China**  
7

8  
9 3 Xiaofeng Luo<sup>1,2</sup>, Xiao Gong<sup>1,2</sup>, Peizhen Zhao<sup>3</sup>, Xia Zou<sup>1,2</sup>, Wen Chen<sup>1,2</sup>, Li Ling<sup>1,2\*</sup>  
10

11 4 <sup>1</sup>Faculty of Medical Statistics and Epidemiology, School of Public Health, Sun Yat-sen University, 74  
12  
13  
14 5 Zhongshan Road II, Guangzhou 510080, China.

15  
16 6 <sup>2</sup>Sun Yat-sen Center for Migrant Health Policy, Sun Yat-sen University, 74 Zhongshan Road II,  
17  
18  
19 7 Guangzhou 510080, China.

20  
21 8 <sup>3</sup> Guangdong Provincial Center for Skin Disease and STI Control, No. 2 Lujing Road, Guangzhou  
22  
23  
24 9 510095, China.

25  
26  
27  
28  
29 11 **\*Correspondence:** Li Ling, PhD, Professor. Faculty of Medical Statistics and Epidemiology, School of  
30  
31 12 Public Health, Sun Yat-sen University, 74 Zhongshan Road II, Guangzhou 510080, China; Sun Yat-sen  
32  
33  
34 13 Center for Migrant Health Policy, Sun Yat-sen University, 74 Zhongshan Road II, Guangzhou 510080,  
35  
36 14 China. Email: lingli@mail.sysu.edu.cn; Tel/Fax: +86-20-87333319.

37  
38  
39 15 **Running head:** Heroin use among MMT clients with HIV/AIDS in Guangdong  
40

41  
42  
43  
44 17 **Word Count:** 2,977 for main text including sub-headings, 205 for abstract  
45  
46  
47  
48  
49  
50  
51  
52  
53  
54  
55  
56  
57  
58  
59  
60

1  
2  
3  
4 **Abstract**

5  
6 **Objective:** Little is known about the heroin use and correlates among MMT clients with HIV/AIDS in  
7  
8  
9  
10  
11  
12  
13  
14  
15  
16  
17  
18  
19  
20  
21  
22  
23  
24  
25  
26  
27  
28  
29  
30  
31  
32  
33  
34  
35  
36  
37  
38  
39  
40  
41  
42  
43  
44  
45  
46  
47  
48  
49  
50  
51  
52  
53  
54  
55  
56  
57  
58  
59  
60

3 Guangdong, China. We aimed to assess the rate of continued heroin use and related predictors among  
4 these sub-group clients.

5 **Setting:** Fourteen MMT clinics located in 9 cities of Guangdong were chosen as study sites.

6 **Participants:** In this study, we reviewed retrospectively 642 clients with opioid dependence, HIV  
7 seropositive, 18 years or older and providing informed consent during 2006-2013.

8 **Primary and secondary outcome measures:** The continued heroin use rate and underlying predictors  
9 were estimated using ordinal logistic regression.

10 **Results:** Of the participants, approximately 98.4% continued using heroin during the first 12 months  
11 after treatment initiation. Higher percentages of continued heroin use were associated with being young  
12 ( $OR_{\leq 30}=0.45$ , 95%CI:0.26-0.80;  $OR_{31-35}=0.63$ , 95%CI: 0.39-1.00;  $OR_{36-40}=0.65$ , 95%CI:0.42-1.01), having  
13 harmonious family relationship ( $OR=1.46$ , 95%CI:1.01-2.12), financial sources depending on family or  
14 friends ( $OR=0.71$ , 95%CI:0.51-0.98), higher maintenance doses ( $OR=0.49$ , 95%CI:0.36-0.68) and  
15 poorer MMT attendance ( $OR_{<20\%}=4.74$ , 95%CI:3.01-7.47;  $OR_{20\%-40\%}=1.74$ , 95%CI:1.16-2.64).

16 **Conclusions:** Heroin use rate is extremely high among MMT clients with HIV/AIDS in Guangdong.  
17 The present findings have implications for reconsidering adjusting the current MMT doses and taking  
18 effective measures to facilitate attendance in order to decrease heroin use and ultimately improve the  
19 effectiveness among these sub-group MMT clients.

20 **Key words:** Heroin Use; Methadone Maintenance Treatment (MMT); HIV; China

21

1  
2  
3  
4 **1 Highlights**

5  
6 1. This is a long-term consecutive study specifically designed to examine concurrent opioid use  
7  
8 among HIV-positive MMT clients in China.  
9

10  
11 2. This study focused on heroin use and higher percentages of heroin use among HIV-positive MMT  
12  
13 clients in China.  
14

15  
16 **6 Limitations**

17  
18 1. Self-reported data are subject to recall bias or deliberate concealment. Family relationship variable  
19  
20 was a client self-perceived indicator and had no standardized measurement for this dimension so  
21  
22 far.  
23  
24

25  
26 2. Although we found a high heroin use rate, 18.9% of the registered HIV-positive MMT individuals  
27  
28 were lost for refusal. Therefore, the currently observed rate of heroin use is most likely to be an  
29  
30 underestimation.  
31  
32

33  
34 3. China is experiencing a significant increase in the use of new drugs, but this study did not consider  
35  
36 it. In addition, we failed to obtain the ART (anti-retroviral treatment) information, and future  
37  
38 studies should be extended to analyze ART as predictor variable to continued heroin use.  
39  
40

41  
42  
43  
44  
45  
46  
47  
48  
49  
50  
51  
52  
53  
54  
55  
56  
57  
58  
59  
60

## 1 Introduction

2 In China, illicit drug use has increased dramatically since the 1980s [1]. There were cumulatively  
3 registered 2.95 million drug users by the end of 2014 and 480,000 newly registrations in 2014  
4 nationwide [2]. Although China recently is experiencing a significant increase in the use of newtype  
5 drugs, heroin still remains the major illicit used drug among drug users [2]. The earliest HIV case was  
6 identified among intravenous drug users (IDUs) in Southern Yunnan province in 1989[3]. The early  
7 spread of HIV epidemics in China mainly attributed to intravenous drug use (IDU)[4]. As of 2013,  
8 437,000 people live with HIV/AIDS in China, including 263,000 people living with HIV and 174,000  
9 AIDS patients [5].

10 Globally, methadone maintenance treatment (MMT) is the most widely used pharmacological  
11 treatment for opioid dependence. China has operated MMT program as a national strategy to combat  
12 the joint threat of drug use and HIV/AIDS since 2004 [6]. For decades, MMT program has achieved its  
13 crucial effectiveness not only in reducing heroin use [7] but also in preventing the spread of HIV [8, 9].  
14 Meanwhile, studies have shown that MMT is beneficial in reducing drug-related criminal activities [10]  
15 and drug-related mortality [11]. In addition, for the HIV-positive individuals, MMT could facilitate the  
16 adherence to antiretroviral therapy [12, 13]. By the end of April 2015, China has 767 MMT clinics in  
17 28 provinces across the nation, serving nearly 190,000 clients [15].

18 However, many clients did not completely abstain from heroin and exhibited continued heroin use  
19 while in MMT [16-19]. Continued heroin use could lead to negative MMT treatment outcomes among  
20 clients [20]. Heroin addicts still contribute a high mortality even with MMT [21]. Overdosed drug  
21 intake remains the most common cause of death among MMT clients [22]. After a period of abstinence  
22 via MMT, the heroin tolerance of clients would decrease, thus overdosed intake may become more

1 prevalent [23, 24]. Individuals with HIV/AIDS are a special group among MMT clients. A  
2 meta-analysis showed that HIV seropositivity would increase the mortality risk of overdose [25]. In  
3 addition, continued heroin use would decrease the retention rate among MMT clients with HIV/AIDS  
4 [26]. Therefore, heroin use deserves more attention among MMT clients with HIV/AIDS. To date,  
5 limited data are available on heroin use among MMT clients with HIV/AIDS in China. To fill this gap,  
6 we applied this study is to examine the heroin use and correlates of higher percentages of heroin use  
7 among MMT clients with HIV/AIDS in Guangdong.

8

## 1 **Methods**

### 2 **Ethics Statement**

3 The Institutional Review Board (IRB) of the School of Public Health (Sun Yat-sen  
4 University ,Guangzhou, China) reviewed and approved the study protocol. All study participants were  
5 asked to provide written informed consent.

### 6 **Study Site and Participants**

7 Guangdong, located in the Southern coast of China, is one of the most developed provinces.  
8 Meanwhile, Guangdong also is one of the HIV/AIDS and drug epidemic areas because it has  
9 cumulative reported 48,718 HIV-positive cases, ranking fifth among provinces in China as of October  
10 2014 [27], in addition, it has one-sixth of totally registered drug users in China [28].

11 This study was conducted in 14 MMT clinics located in 9 cities of Guangdong. Between July 2006  
12 and December 2013, there were 9,397 entrants; among them, 8,912 (94.8%) received HIV test at entry  
13 and 485 (5.2%) refused to be test. Of the remaining 805 MMT clients who tested HIV positive at MMT  
14 entry, 81.1% (653 of 805) participated in this study. Participants were eligible if they were (1)  
15 diagnosed with opioid dependence according to the International Classification of Diseases (10th  
16 Revision); (2) 18 years or older; (3) tested to be HIV-positive; and (4) able to provide informed  
17 consent.

18 In this study, “drop-out” was defined as a participant failing to continue MMT for 14 consecutive  
19 days [29]. In the accordance with drop-out, the study period could be classified into two categories: one  
20 was defined as the duration between enrolment and dropout, the other was defined as the duration  
21 between enrolment and the end of the first 12 months.

### 22 **Measures**

### 1 ***Self-report Risk Behaviors***

2 At admission, as well as 6<sup>th</sup> and 12<sup>th</sup> month respectively, each participant was requested to  
3 complete a questionnaire covering demographic characteristics, drug use history including injecting  
4 drug and sharing needle/equipment, sexual activity history, and condom use status.

5 A client was regarded as having corresponding risk behaviors during the study period if he/she  
6 reported those behaviors either 6<sup>th</sup> or 12<sup>th</sup> interview (i.e. drug use behaviors including injecting drug  
7 and sharing needle/equipment; and risk sexual activities including, multiple sex partner, inconsistent  
8 condom use and sex trade for drugs.).

### 9 ***Methadone Maintenance Doses and Attendance***

10 In China, to insure MMT security, clients are forbidden to take Methadone outside the clinic. Once  
11 enrolled in MMT, the clients must go to the clinic at consultation hours daily to take the prescribed  
12 doses of Methadone under the supervision of clinic staff, and the daily doses and date were routinely  
13 recorded in the national unified MMT management system. The treatment cost was RMB 10 Yuan  
14 (USD: 1.5 Dollar) per day regardless of the client' intake doses and times.

15 Average maintenance dose was obtained via computing the mean of daily prescribed doses.

16 The percentage of MMT attendance was calculated based on proportion of days that a client  
17 actually received the doses over the study period.

### 18 ***Heroin Use during the Study Period***

19 A positive result of urine morphine generally means heroin use by the clients within a few days.

20 Urine-based morphine tests were monthly performed on a random day during the study period.

21 During the study period, a client was recognized as a heroin user as long as any urine morphine  
22 test result was positive. The percentage of heroin use was calculated based on the number of positive



1 urine morphine test results and the number of total urine test times during the study period. Based on  
2 the urine morphine tests, the clients were currently grouped as “urine morphine (+) (i.e. heroin use)”  
3 and “urine morphine (-)(i.e. no heroin use)”. Additionally, the positive percentages were grouped as  
4 <40%, 40-80% and >80% based on the data distribution.

#### 5 ***HIV and Urine Morphine Tests***

6 Except for those who were already confirmed as HIV-positive prior this study, each client was  
7 invited to receive HIV testing. HIV infection status was screened using an enzyme-linked  
8 immunosorbent assay (ELISA) technique (Beijing BGI-GBI Biotech Co., Ltd, Beijing, China). Positive  
9 blood specimens for HIV were confirmed using a Western blot assay (Abbott, MP Biomedicals, LLC,  
10 Singapore) by the local Centers for Disease Control (CDC). According to related national guidelines,  
11 pre- and post- test counseling services were provided.

12 Random urine morphine status was screened using a Morphine Diagnostic Kit (Colloidal Gold)  
13 technique (ABON Biopharm Co., Ltd, Hangzhou, China).

#### 14 **Statistical Analysis**

15 Statistical analyses were performed using SPSS 17.0 for Windows (SPSS Inc., Chicago).  
16 Categorical variables were described with percentages. Multivariate ordinal logistic regression analysis  
17 was conducted to predict higher percentages of heroin use from baseline information including  
18 demographic, drug use and multiple sex partners, as well as average maintenance dose and percentages  
19 of MMT attendance during the study period among the MMT clients with HIV/AIDS. Any  $p < 0.05$  was  
20 considered to be statistically significant.

## 1 Results

### 2 *Study Participants and Demographic Characteristics*

3 Among the 642 participants (11 clients were not included for refusing to provide urine specimen),  
4 138(21.5%) were elder than 40; 600 (93.5%) were males; 636 (99.1%) were ethnic Han (China's  
5 predominant ethnic group), 343 (53.4%) were never married; 25.7% just had elementary or lower  
6 education; 63.9% were unemployed; only 23.7% had harmonious family relationship; and 61.7%  
7 obtained financial sources from their family or friends (Table 1).

### 8 *Heroin Use and Multiple Sex Partner at Baseline*

9 Table 1 presents baseline information on heroin use. Of the participants, 78.3% had used heroin  
10 for more than 10 years; 64.3% participants used heroin at least 3 times daily on average; the vast  
11 majority (97.7%) abused powdered heroin and 98.6% ever administered drug by injection. Among the  
12 IDUs, 58.1% ever shared intravenous needles. Only 12.5% never met the peer users.

13 Of these participants, 17.4% had had sexual activity with multiple sex partner (Table 1).

### 14 *Average Maintenance Doses and Attendance*

15 Among all participants, 60.7% had received doses below 60 ml and the average maintenance dose  
16 was (57.9 ± 27.1) ml.

17 In addition, 20.1% participants' MMT attendance percentages were less than 20% and only 36.3%  
18 were over 80% (Table 1).

### 19 *Heroin Use during the Study Period*

20 Approximately 98.4% (632/642) participants were defined as heroin users during the study period.  
21 Among the 632 urine morphine (+) clients, positive percentages of urine morphine tests that <40%,  
22 40%-80% and >80% were 29.0%, 32.6% and 38.4% respectively (Table 2).

1  
2  
3  
4 1 After adjusted for potential confounding variables listed in the table, multiple ordinal logistic  
5  
6 2 regression analysis indicated that a higher percentage of heroin use was independently associated with  
7  
8 3 age, family relationship, financial sources, average MMT doses and percentage of MMT attendance.  
9  
10 4 Participants who were younger ( $OR_{\leq 30}=0.45$ , 95%CI: 0.26-0.80;  $OR_{31-35}=0.63$ , 95%CI: 0.39-1.00;  
11  
12 5  $OR_{36-40}=0.65$ , 95%CI: 0.42-1.01), got money from family or friends ( $OR=0.71$ , 95%CI: 0.51-0.98) and  
13  
14 6 had MMT doses over 60 ml ( $OR=0.49$ , 95%CI: 0.36-0.68) were more likely to be tested as having  
15  
16 7 lower percentages of heroin use; and those who had harmonious family relationships ( $OR=1.46$ , 95%CI:  
17  
18 8 1.01-2.12) and poor MMT attendance percentages ( $OR_{\leq 20}=4.74$ , 95%CI: 3.01-7.47;  $OR_{20-}=1.74$ , 95%CI:  
19  
20 9 1.16-2.64) were more likely to have higher percentages of heroin use (Table 2).  
21  
22  
23  
24  
25

#### 26 ***Self-report High Risk Behaviors during the Study Period***

27  
28  
29 11 Among the clients with urine morphine (+), 68.5% (440 of 642) and 46.3% (297 of 642) completed  
30  
31 12 the 6<sup>th</sup> and 12<sup>th</sup> month follow-up interviews respectively. Of the 440 clients completed at least one  
32  
33 13 follow-up interview, 78.3% ever used drugs, 88.2% used intravenous drugs, and 20.7% ever shared  
34  
35 14 intravenous needles; 57.0% were sexual active, 28.7% had sex with multiple sex partners, and 40.2%  
36  
37 15 never used condom during the sexual course. Also, 13.3% traded sex for drugs (Table 3).  
38  
39  
40  
41  
42  
43  
44  
45  
46  
47  
48  
49  
50  
51  
52  
53  
54  
55  
56  
57  
58  
59  
60

## 1 Discussion

2 Heroin use among MMT clients has been reported substantially worldwide [17, 18]. HIV-positive  
3 drug users are a unique subgroup for playing a “dual bridge” role in HIV transmission. This study is an  
4 extension of our previous study [30].

5 Findings from the current analysis revealed an extremely heroin use rate among MMT clients with  
6 HIV/AIDS in Guangdong. Approximately 98.4% participants continued use heroin during the study  
7 period, which is far exceeding those reported by other researches in China [16-18]. Our results were  
8 based on random, long-term and consecutive urine tests, which was blind to clients in case those  
9 continued heroin users deliberately avoid the test time. Meanwhile, the rate was higher than that (75%)  
10 of general MMT clients reported by our prior study [30]. Given that continued heroin use might lead to  
11 adverse health outcomes [22, 25] and high drop-out rate [26] among MMT clients with HIV/AIDS,  
12 targeted interventions and control programs are urgently needed for this subgroup.

13 Compared to the young participants, the elders showed greater likelihood of continued heroin use.  
14 Many elders had turned from clinical latency stage to AIDS stage and they may experience more pain  
15 and psychological symptoms [31, 32]. Studies had shown that depressive symptoms are common  
16 among people with HIV infection [33, 34]. However, MMT improvements in depressive symptoms and  
17 the physical domain of QOL (quality of life) among HIV-positive heroin users were poorer than in  
18 those without HIV infection [35]. Also, most of them had lost the courage and confidence to live on.  
19 Culturally, stigma and discrimination towards drug use and HIV/AIDS might seriously impede the  
20 MMT attendance [36]. In addition, inappropriate perceptions of MMT should not be neglected [37].

21 Families play important roles in the life of drug users. Drug use and MMT is regarded as a family  
22 issue in China [38]. Harmonious family relationship could potentially encourage treatment

1 participation and enhance compliance [30, 36]. A notable finding in our study was that the clients who  
2 had harmonious family relationship were more likely to use heroin, which contradicts previous studies  
3 [30, 36]. This is probably because the family members in harmonious family relationship have more  
4 tolerance towards them, which may subsequently indulged their heroin use behavior. However, this  
5 speculation requires further investigation.

6 Generally, high drug fee generally made the drug users can't afford it. In our study, 63.9% were  
7 unemployed; for the employed, many only had short-term jobs. This may partly explain the reasons  
8 why the clients whose financial sources depend on family or friends were less likely to use heroin.  
9 Money from family or friends is meant to support basic life and is far not enough to meet drug  
10 expenditure. Furthermore, family or friends' support might potentially supervise and encourage  
11 treatment participation and compliance [38].

12 Higher Methadone doses would promote the retention rate in MMT [39]. An appropriate MMT  
13 dose is the most effective in suppressing heroin use in treatment [20, 40]. The Methadone dose  
14 recommended by US National Institutes of Health was  $\geq 60$  mg/day [41], and should be higher for  
15 HIV-positive individuals [42]. Studies showed an adequate dose of Methadone (e.g., 80- 120 mgs/day)  
16 would significantly reduce heroin use among clients within the first two months of treatment and  
17 eventually either eliminated or significantly curtailed with time in treatment [43, 44]. We found 60.7%  
18 participants' doses were less than 60 mg/day. Compared to those with higher doses, the clients with  
19 lower doses were more likely to use heroin. Further researches are needed on appropriate doses of  
20 Methadone and whether increasing doses could decrease the rate of continued heroin use.

21 Without exception, treatment effectiveness relies upon sufficient levels of medication adherence.  
22 MMT requires long-term or even life-long intake of Methadone at an adequate dose on a daily basis

1 [45]. We found that the lower attendance meant the higher percentage of heroin use. This was  
2  
3  
4  
5  
6 consistent with our prior study [30]. Continued heroin users attended MMT programs irregularly and  
7  
8  
9 the attendance significantly declined with the duration that they retained in treatment program [46].  
10  
11  
12 Poorer attendance seeded continued heroin use. In addition, misconceptions might predict dropout rates  
13  
14 and poor adherence among newly admitted MMT clients [47]. So, future research might need to  
15  
16 develop and/or integrate other necessary interventions to encourage client adherence to the treatment  
17  
18  
19 program.

20  
21 HIV-positive drug users have been regarded as a “dual risk” subgroup. They transmit HIV via  
22  
23  
24 either sharing needles or having unprotected sexual intercourse with partners. Currently, sexual  
25  
26  
27 transmission is the most prevalent spread pattern of HIV/AIDS in China [5]. Among the participants  
28  
29  
30 who finished at least once interview, 20.7% ever shared needle; 28.7% ever had sex with multiple  
31  
32  
33 partners; 40.2% never used condom and 13.3% had sex for drugs during the study period. Considering  
34  
35  
36 the potential bridge role of those with dual risk behaviors in transmitting HIV to others, research on the  
37  
38  
39 interaction of HIV-positive MMT clients and risk behaviors should be given high priority. Data showed  
40  
41  
42 that changing unsafe drug use behaviors was more effective than changing unsafe sexual behaviors  
43  
44  
45 [19]. In future treatment procedures, physicians and nurses should play an active role in educating  
46  
47  
48 clients about safe sex and encourage clients to use condoms.

49  
50 This study is subject to certain limitations. Firstly, self-reported data are subject to recall bias or  
51  
52  
53 deliberate concealment. Family relationship variable was a client self-perceived indicator and had no  
54  
55  
56 standardized measurement for this dimension so far. Secondly, although we found a high heroin use  
57  
58  
59 rate, 18.9% of the registered HIV-positive MMT individuals were lost for refusal. Therefore, the  
60  
61  
62 currently observed rate of heroin use is most likely to be an underestimation. Thirdly, China is

1  
2  
3  
4 1 experiencing a significant increase in the use of new drugs [2], but this study did not consider it. In  
5  
6 2 addition, we failed to obtain the ART (anti-retroviral treatment) information, and future studies should  
7  
8  
9 3 be extended to analyze ART as predictor variable to continued heroin use.

10  
11 4 In summary, findings from this study provide important implications for future MMT programs  
12  
13  
14 5 targeting continued heroin use among HIV-positive clients. Concretely, first, continuous and efficient  
15  
16 6 MMT consulting and health education interventions need to be conducted for reducing continued  
17  
18 7 heroin use. Interventions involving family members in supervision of participation and compliance  
19  
20  
21 8 should be reinforced. Second, doses and attendance are crucial components affecting MMT' outcomes,  
22  
23  
24 9 so how to prescribe an appropriate MMT dose and improve sufficient attendance have become issues of  
25  
26 10 great urgency.

27  
28  
29 11  
30  
31 12  
32  
33 13  
34  
35  
36  
37  
38  
39  
40  
41  
42  
43  
44  
45  
46  
47  
48  
49  
50  
51  
52  
53  
54  
55  
56  
57  
58  
59  
60

**1 Role of Funding Source**

2 This study was supported by the National Natural Science Foundation of China (grant no.  
3 71173245 and 81473065 to L.L.) and China Medical Board (12-111 to L.L.).The funding agencies play  
4 no role in the study design, data collection, and data analysis, interpretation of study results and writing  
5 of the manuscript.

**6 Contributors**

7 XL designed the study, performed data analysis and wrote the draft manuscript. XG and PZ  
8 performed data analysis. XZ and WC collected the data. LL supervised the study. All authors  
9 contributed to the interpretation of the data and approved the final version for submission.

**10 Conflict of Interest**

11 The authors declare no conflicts of interest.

**12 Data Sharing Statement**

13 No additional unpublished data are available.

**14 Acknowledgements**

15 We are grateful to the staff of MMT clinics in the study site for their valuable assistance in subject  
16 recruitment and data collection. We appreciate the HIV-positive MMT participants spending time and  
17 sharing with us regarding their information.

18



**References:**

1. Zhao M, Ling W. HIV/AIDS and drug use in China—interactions, impacts, and issues. *Subst Use Misuse*. 2012;47:1015-1025.
2. The State Council Information Office of the People's Republic of China. 2014 annual report on drug situation in China; 2014.
3. Jia M, Luo H, Ma Y, Wang N, Smith K, Mei J, et al. The HIV epidemic in Yunnan Province, China, 1989-2007. *J Acquir Immune Defic Syndr*. 2010;53:S34-40.
4. Bao YP, Liu ZM. Systematic review of HIV and HCV infection among drug users in China. *Int J STD AIDS*. 2009;20:399-405.
5. UNAIDS. 2014 China AIDS Response Progress Report; 2014.
6. Wu Z. Landmark government methadone maintenance program in mainland China. In: 15th International AIDS Conference; 2004
7. Yin W, Hao Y, Sun X, Gong X, Li F, Li J, et al. Scaling up the national methadone maintenance treatment program in China: achievements and challenges. *International Journal of Epidemiology*. 2010;39:ii29-ii37.
8. Zou X, Ling L, Zhang L. Trends and risk factors for HIV, HCV and syphilis seroconversion among drug users in a methadone maintenance treatment programme in China: a 7-year retrospective cohort study. *BMJ Open*. 2015;5:e008162.
9. Dai J, Zhao L, Liang Y. Policy implementation of methadone maintenance treatment and HIV infection: evidence from Hubei province, China. *Subst Abuse Treat Prev Policy*. 2013;8:38.
10. Sun HM, Li XY, Chow EPF, Li T, Xian Y, Lu YH, et al. Methadone maintenance treatment

- 1  
2  
3  
4 1 programme reduces criminal activity and improves social well-being of drug users in China:  
5  
6 2 a systematic review and meta-analysis. *BMJ Open*. 2015;5:e005997-e005997.  
7  
8  
9 3 11. Zhao Y, Shi CX, McGoogan JM, Rou K, Zhang F, Wu Z. Methadone maintenance treatment  
10  
11 4 and mortality in HIV-positive people who inject opioids in China. *Bulletin of the World*  
12  
13 5 *Health Organization*. 2013;91:93-101.  
14  
15  
16 6 12. Tran BX, Ohinmaa A, Duong AT, Do NT, Nguyen LT, Nguyen QC, et al. Changes in drug  
17  
18 7 use are associated with health-related quality of life improvements among methadone  
19  
20 8 maintenance patients with HIV/AIDS. *Quality of Life Research*. 2012;21:613-623.  
21  
22  
23 9 13. Reddon H, Milloy MJ, Simo A, Montaner J, Wood E, Kerr T. Methadone maintenance  
24  
25 10 therapy decreases the rate of antiretroviral therapy discontinuation among HIV-positive illicit  
26  
27 11 drug users. *AIDS and Behavior*. 2014;18:740-746.  
28  
29  
30  
31 12 14. Chou YC, Shih SF, Tsai WD, Li CS, Xu K, Lee TS. Improvement of quality of life in  
32  
33 13 methadone treatment patients in northern Taiwan: a follow-up study. *BMC Psychiatry*.  
34  
35 14 2013;13:190.  
36  
37  
38  
39 15 15. The National Health and Family Planning Commission of the People's Republic of China.  
40  
41 16 The national health and family planning commission published online. In;  
42  
43 17 2015.URL:<http://www.nhfpc.gov.cn/zhuzhan/zxfb/201506/f2bd445f5ec04085adb9b84d995c>  
44  
45 18 [b22b.shtml](http://www.nhfpc.gov.cn/zhuzhan/zxfb/201506/f2bd445f5ec04085adb9b84d995cb22b.shtml)  
46  
47  
48  
49 19 16. Wang R, Ding Y, Bai H, Duan S, Ye R, Yang Y, et al. Illicit heroin and methamphetamine  
50  
51 20 use among methadone maintenance treatment patients in Dehong Prefecture of Yunnan  
52  
53 21 Province, China. *PLoS One*. 2015;10:e0133431.  
54  
55  
56 22 17. Sullivan SG, Wu Z, Cao X, Liu E, Detels R. Continued drug use during methadone treatment  
57  
58  
59  
60

- 1  
2  
3  
4 1 in China: A retrospective analysis of 19,026 service users. *Journal of Substance Abuse*  
5  
6 2 *Treatment*. 2014;47:86-92.
- 7  
8  
9 3 18. Li L, Lin C, Wan D, Zhang L, Lai W. Concurrent heroin use among methadone maintenance  
10  
11 4 clients in China. *Addictive Behaviors*. 2012;37:264-268.
- 12  
13  
14 5 19. Zhang L, Chow EP, Zhuang X, Liang Y, Wang Y, Tang C, et al. Methadone maintenance  
15  
16 6 treatment participant retention and behavioural effectiveness in China: a systematic review  
17  
18 7 and meta-analysis. *PLoS One*. 2013;8:e68906.
- 19  
20  
21 8 20. Leri F, Bruneau J, Stewart J. Understanding polydrug use: review of heroin and cocaine  
22  
23 9 co-use. *Addiction*. 2003;98:7-22.
- 24  
25  
26 10 21. Jimenez-Treviño L, Saiz PA, García-Portilla MP, Díaz-Mesa EM, Sánchez-Lasheras F,  
27  
28 11 Burón P, et al. A 25-year follow-up of patients admitted to methadone treatment for the first  
29  
30 12 time: Mortality and gender differences. *Addictive Behaviors*. 2011;36:1184-1190.
- 31  
32  
33 13 22. McCowan C, Kidd B, Fahey T. Factors associated with mortality in Scottish patients  
34  
35 14 receiving methadone in primary care: retrospective cohort study. *BMJ*. 2009;338:b2225.
- 36  
37  
38 15 23. Darke S, Ross J, Hall W. Overdose among heroin users in Sydney, Australia: II. responses to  
39  
40 16 overdose. *Addiction*. 1996;91:413-7.
- 41  
42  
43 17 24. Darke S, Ross J, Hall W. Overdose among heroin users in Sydney, Australia: I. Prevalence  
44  
45 18 and correlates of non-fatal overdose. *Addiction*. 1996;91:405-11.
- 46  
47  
48 19 25. Green TC, McGowan SK, Yokell MA, Pouget ER, Rich JD. HIV infection and risk of  
49  
50 20 overdose: a systematic review and meta-analysis. *AIDS*. 2012;26:403-417.
- 51  
52  
53 21 26. Jiang H, Cao X, Wang C, Luo W, Li J, Rou K, et al. Study on the adherence and related  
54  
55 56 22 determinants among HIV-positive clients under methadone maintenance treatment in Dali,  
56  
57  
58  
59  
60

- 1  
2  
3  
4 1 Yunnan province from 2005 to 2013. *Chin J Epidemiol.* 2014;35:255-258.
- 5  
6 27. NetEase. Guangdong had cumulatively reported 48,718 HIV-infected individuals, ranking  
7  
8 fifth position in China. In;  
9  
10 2014.URL:<http://news.163.com/14/1201/06/ACC0BV8E00014AEE.html>
- 11  
12  
13 28. China.org.cn. Guangdong has the largest number of registered drug users (457,000),  
14  
15 accounting for one-sixth of the total registered drug users of China. In;  
16  
17 2014.URL:[http://www.china.com.cn/news/2014-11/03/content\\_33947964.htm](http://www.china.com.cn/news/2014-11/03/content_33947964.htm)
- 18  
19  
20 29. Zhang L, Zou X, Zhang D, Li X, Zhao P, Ling L. Investigation of repeat client drop-out and  
21  
22 re-enrolment cycles in fourteen methadone maintenance treatment clinics in Guangdong,  
23  
24 China. *PLoS One.* 2015;10:e0139942.
- 25  
26  
27 30. Luo X, Zhao P, Gong X, Zhang L, Tang W, Zou X, et al. Concurrent heroin use and  
28  
29 correlates among methadone maintenance treatment clients: a 12-month follow-up study in  
30  
31 Guangdong Province, China. *Int J Environ Res Public Health.* 2016;13:305.
- 32  
33  
34 31. Rodriguez-Penney AT, Iudicello JE, Riggs PK, Doyle K, Ellis RJ, Letendre SL, et al.  
35  
36 Co-morbidities in persons infected with HIV: increased burden with older age and negative  
37  
38 effects on health-related quality of life. *AIDS Patient Care and STDs.* 2013;27:5-16.
- 39  
40  
41 32. Tsao JC, Plankey MW, Young MA. Pain, psychological symptoms and prescription drug  
42  
43 misuse in HIV: A literature review. *J Pain Manag.* 2012;5:111-118.
- 44  
45  
46 33. Edelman EJ, Gordon K, Becker WC, Goulet JL, Skanderson M, Gaither JR, et al. Receipt of  
47  
48 opioid analgesics by HIV-infected and uninfected patients. *J Gen Intern Med.* 2013;28:82-90.
- 49  
50  
51 34. Sherr L, Clucas C, Harding R, Sibley E, Catalan J. HIV and Depression - a systematic review  
52  
53 of interventions. *Psychol Health Med.* 2011;16:493-527.
- 54  
55  
56  
57  
58  
59  
60

- 1  
2  
3  
4 1 35. Wang P, Lin H, Yen C, Yeh Y, Hsu C, Chung K, et al. Comparison of outcomes after  
5  
6 2 3-month methadone maintenance treatment between heroin users with and without HIV  
7  
8 3 infection: a 3-month follow-up study. *Harm Reduction Journal*. 2015;12:13.  
9  
10  
11 4 36. Liu H, Li J, Lu Z, Liu W, Zhang Z. Does Chinese culture influence psychosocial factors for  
12  
13 5 heroin use among young adolescents in China? A cross-sectional study. *BMC Public Health*.  
14  
15 6 2010;10:563.  
16  
17  
18 7 37. Xu H, Gu J, Lau JTF, Zhong Y, Fan L, Zhao Y, et al. Misconceptions toward methadone  
19  
20 8 maintenance treatment (MMT) and associated factors among new MMT users in Guangzhou,  
21  
22 9 China. *Addictive Behaviors*. 2012;37:657-662.  
23  
24  
25  
26 10 38. Lin C, Wu Z, Detels R. Family support, quality of life and concurrent substance use among  
27  
28 11 methadone maintenance therapy clients in China. *Public Health*. 2011;125:269-274.  
29  
30  
31 12 39. Bao YP, Liu ZM, Epstein DH, Du C, Shi J, Lu L. A meta-analysis of retention in methadone  
32  
33 13 maintenance by dose and dosing strategy. *Am J Drug Alcohol Abuse*. 2009;35:28-33.  
34  
35  
36 14 40. Amato L, Davoli M, Perucci CA, Ferri M, Faggiano F, Mattick RP. An overview of  
37  
38 15 systematic reviews of the effectiveness of opiate maintenance therapies: available evidence to  
39  
40 16 inform clinical practice and research. *J Subst Abuse Treat*. 2005;28:321-9.  
41  
42  
43  
44 17 41. NIH Consensus Conference. Effective medical treatment of opiate addiction. National  
45  
46 18 Consensus Development Panel on Effective Medical Treatment of Opiate Addiction. *JAMA*.  
47  
48 19 1998;280:1936-43.  
49  
50  
51 20 42. Liu E, Rou K, McGoogan JM, Pang L, Cao X, Wang C, et al. Factors associated with  
52  
53 21 mortality of HIV-positive clients receiving methadone maintenance treatment in China.  
54  
55 22 *Journal of Infectious Diseases*. 2013;208:442-453.  
56  
57  
58  
59  
60

- 1  
2  
3  
4 1 43. Dole VP, Nyswander ME, Kreek MJ. Narcotic Blockade. Archives of Internal Medicine.  
5  
6 2 1966;118:304-309.  
7  
8  
9 3 44. Cooper JR. Ineffective use of psychoactive drugs. Methadone treatment is no exception.  
10  
11 4 JAMA. 1992;267:281-282.  
12  
13  
14 5 45. Mattick, RP, Breen C, Kimber J, Davoli M. Methadone maintenance therapy versus no  
15  
16 6 opioid replacement therapy for opioid dependence. Cochrane Database Syst Rev.  
17  
18 7 2009;8:CD002209.  
19  
20  
21 8 46. Che Y, Assanangkornchai S, McNeil E, Li J, You J, Chongsuvivatwong V. Patterns of  
22  
23 9 attendance in methadone maintenance treatment program in Yunnan Province, China. Am J  
24  
25 10 Drug Alcohol Abuse. 2011;37:148-154.  
26  
27  
28  
29 11 47. Gu J, Xu H, Lau JTF, Hao Y, Zhong Y, Fan L, et al. Misconceptions predict dropout and  
30  
31 12 poor adherence prospectively among newly admitted first-time methadone maintenance  
32  
33 13 treatment clients in Guangzhou, China. Addiction. 2012;107:1641-1649.  
34  
35  
36  
37  
38  
39  
40  
41  
42  
43  
44  
45  
46  
47  
48  
49  
50  
51  
52  
53  
54  
55  
56  
57  
58  
59  
60

## 1 Tables

2 Table1. Characteristics of the participants (n\* =642)

| Characteristics                            | Urine Morphine(-) | Urine Morphine(+) | Total     |
|--------------------------------------------|-------------------|-------------------|-----------|
|                                            | (n=10)            | (n=632)           | (N=642)   |
|                                            | No. (%)           | No. (%)           | No. (%)   |
| Age at Baseline (years)                    |                   |                   |           |
| ≤30                                        | 2(20.0)           | 113(17.9)         | 114(17.9) |
| 31-                                        | 5(50.0)           | 186(29.4)         | 191(29.8) |
| 36-                                        | 1(10.0)           | 197(31.2)         | 198(30.8) |
| ≥41                                        | 2(20.0)           | 136(21.5)         | 138(21.5) |
| Gender                                     |                   |                   |           |
| Male                                       | 10(100.0)         | 590(93.4)         | 600(93.5) |
| Female                                     | 0(0)              | 42(6.6)           | 42(6.5)   |
| Ethnic                                     |                   |                   |           |
| Han                                        | 10(100.0)         | 626(99.1)         | 636(99.1) |
| Others                                     | 0(0)              | 6(0.9)            | 6(0.9)    |
| Marital Status at Baseline                 |                   |                   |           |
| Never married                              | 4(40.0)           | 339(53.6)         | 343(53.4) |
| Married currently                          | 5(50.0)           | 222(35.1)         | 227(35.4) |
| Others                                     | 1(10.0)           | 71(11.2)          | 72(11.2)  |
| Education Level                            |                   |                   |           |
| Elementary or lower                        | 1(10.0)           | 164(25.9)         | 165(25.7) |
| Juniorhigh school                          | 9(90.0)           | 400(63.3)         | 409(63.7) |
| Senior high school or higher               | 0(0)              | 68(10.8)          | 68(10.6)  |
| Employed Status at Baseline                |                   |                   |           |
| Unemployed                                 | 2(20.0)           | 408(64.6)         | 410(63.9) |
| Employed                                   | 8(80.0)           | 224(35.4)         | 232(36.1) |
| Family Relationship at Baseline            |                   |                   |           |
| Harmonious                                 | 3(30.0)           | 149(23.6)         | 152(23.7) |
| Inharmonious                               | 7(70.0)           | 483(76.4)         | 490(76.3) |
| Mainly Financial Sources at Baseline       |                   |                   |           |
| Family or friends                          | 6(60.0)           | 390(61.7)         | 396(61.7) |
| Others                                     | 4(40.0)           | 242(38.3)         | 246(38.3) |
| Duration of Drug Abuse (years)             |                   |                   |           |
| ≤10                                        | 3(30.0)           | 136(21.5)         | 139(21.7) |
| 11-15                                      | 3(30.0)           | 263 (41.6)        | 266(41.4) |
| ≥16                                        | 4(40.0)           | 233(36.9)         | 237(36.9) |
| Type of Drug Use at Baseline               |                   |                   |           |
| Heroin                                     | 9(90.0)           | 618(97.8)         | 627(97.7) |
| Others                                     | 1(10.0)           | 14(2.2)           | 15(2.3)   |
| Intravenous Drug Use at Baseline           |                   |                   |           |
| Yes                                        | 10(100.0)         | 623(98.6)         | 633(98.6) |
| No                                         | 0(0)              | 9(1.4)            | 9(1.4)    |
| Shared Needles to Inject Drugs at Baseline |                   |                   |           |

|                                                  |         |           |           |
|--------------------------------------------------|---------|-----------|-----------|
| Yes                                              | 4(40.0) | 364(58.4) | 368(58.1) |
| No                                               | 6(60.0) | 259(41.6) | 265(41.9) |
| Average Times of Drug Use per Day at Baseline    |         |           |           |
| ≤2                                               | 3(30.0) | 226(35.8) | 229(35.7) |
| ≥3                                               | 7(70.0) | 406(64.2) | 413(64.3) |
| Frequency of Meeting with Peer Users at Baseline |         |           |           |
| none                                             | 0(0)    | 80(12.7)  | 80(12.5)  |
| 1-4/month                                        | 2(20.0) | 160(25.3) | 162(25.2) |
| 1-6/week                                         | 3(30.0) | 161(25.5) | 164(25.5) |
| > 1/day                                          | 5(50.0) | 231(36.6) | 236(36.8) |
| Multiple Sex Partners at Baseline                |         |           |           |
| Yes                                              | 2(20.0) | 110(17.4) | 111(17.4) |
| No                                               | 8(80.0) | 522(82.6) | 530(82.6) |
| Average Maintenance Doses (ml/day)               |         |           |           |
| ≥60                                              | 7(70.0) | 245(38.8) | 252(39.3) |
| <60                                              | 3(30.0) | 387(61.2) | 390(60.7) |
| Percentages of MMT Attendance (%)                |         |           |           |
| <20                                              | 2(20.0) | 127(20.1) | 129(20.1) |
| 20-                                              | 0(0)    | 140(22.2) | 140(21.8) |
| 50-                                              | 1(10.0) | 139(22.0) | 140(21.8) |
| ≥80%                                             | 7(70.0) | 226(35.8) | 233(36.3) |

---

\*11 clients refuse to provide urine specimen to morphine test.



1 Table2. Correlates of higher percentages of opioid use among urine morphine (+) participants  
 2 during the study period (n=632)

| Characteristics                          | <40%<br>(n=183)      | 40%-80%<br>(n=206)   | >80%<br>(n=243)      | OR(95%CI) <sup>a, b</sup> | <i>p</i> <sup>b</sup> |
|------------------------------------------|----------------------|----------------------|----------------------|---------------------------|-----------------------|
|                                          | No. (%) <sup>*</sup> | No. (%) <sup>*</sup> | No. (%) <sup>*</sup> |                           |                       |
| <b>Age (years)</b>                       |                      |                      |                      |                           |                       |
| ≤30                                      | 36(31.9)             | 47(41.6)             | 30(26.5)             | 0.45(0.26-0.80)           | <b>0.006</b>          |
| 31-                                      | 55(29.6)             | 56(30.1)             | 75(40.3)             | 0.63(0.39-1.00)           | <b>0.051</b>          |
| 36-                                      | 55(27.9)             | 68(34.5)             | 74(37.6)             | 0.65(0.42-1.01)           | <b>0.054</b>          |
| ≥41                                      | 37(27.2)             | 35(25.7)             | 64(47.1)             | 1.00                      |                       |
| <b>Gender</b>                            |                      |                      |                      |                           |                       |
| Male                                     | 168(28.5)            | 197(33.4)            | 225(38.1)            | 0.94(0.50-1.75)           | 0.844                 |
| Female                                   | 15(35.7)             | 9(21.4)              | 18(42.9)             | 1.00                      |                       |
| <b>Ethnic</b>                            |                      |                      |                      |                           |                       |
| Han                                      | 181(28.9)            | 206(32.9)            | 239(38.2)            | 0.24(0.05-1.26)           | 0.092                 |
| Others                                   | 2(33.3)              | 0(0)                 | 4(66.7)              | 1.00                      |                       |
| <b>Marital Status</b>                    |                      |                      |                      |                           |                       |
| Never married                            | 97(28.6)             | 117(34.5)            | 125(36.9)            | 1.52(0.91-2.55)           | 0.111                 |
| Married Currently                        | 58(26.1)             | 71(32.0)             | 93(41.9)             | 1.47(0.88-2.48)           | 0.144                 |
| Others                                   | 28(39.4)             | 18(25.4)             | 25(35.2)             | 1.00                      |                       |
| <b>Education Level</b>                   |                      |                      |                      |                           |                       |
| Elementary or lower                      | 44(26.8)             | 54(32.9)             | 66(40.2)             | 1.03(0.60-1.79)           | 0.905                 |
| Juniorhigh school                        | 117(29.3)            | 131(32.8)            | 152(38.0)            | 1.11(0.67-1.82)           | 0.686                 |
| Senior high school or higher             | 22(32.4)             | 21(30.9)             | 25(36.8)             | 1.00                      |                       |
| <b>Employment Status at Baseline</b>     |                      |                      |                      |                           |                       |
| Unemployed                               | 122(29.9)            | 136(33.3)            | 150(36.8)            | 0.90(0.64-1.27)           | 0.563                 |
| Employed                                 | 61(27.2)             | 70(31.3)             | 93(41.5)             | 1.00                      |                       |
| <b>Family Relationship at Baseline</b>   |                      |                      |                      |                           |                       |
| Harmonious                               | 37(24.8)             | 48(32.2)             | 64(43.0)             | 1.46(1.01-2.12)           | <b>0.046</b>          |
| Inharmonious                             | 146(30.2)            | 158(32.7)            | 179(37.1)            | 1.00                      |                       |
| <b>Mainly Financial Sources</b>          |                      |                      |                      |                           |                       |
| Family or friends                        | 121(31.0)            | 132(33.8)            | 137(35.1)            | 0.71(0.51-0.98)           | <b>0.038</b>          |
| Others                                   | 62(25.6)             | 74(30.6)             | 106(43.8)            | 1.00                      |                       |
| <b>Duration of Drug Abuse (years)</b>    |                      |                      |                      |                           |                       |
| ≤10                                      | 35(25.7)             | 53(39.0)             | 48(35.3)             | 0.91(0.58-1.42)           | 0.665                 |
| 11-15                                    | 81(30.8)             | 84(31.9)             | 98(37.3)             | 0.96(0.67-1.38)           | 0.845                 |
| ≥16                                      | 67(28.8)             | 69(29.6)             | 97(41.6)             | 1.00                      |                       |
| <b>Average Times of Drug Use per Day</b> |                      |                      |                      |                           |                       |
| ≤2                                       | 53(23.5)             | 92(40.7)             | 81(35.8)             | 0.86(0.62-1.19)           | 0.364                 |
| ≥3                                       | 130(32.0)            | 114(28.1)            | 162(39.9)            | 1.00                      |                       |
| <b>Shared Needles at Baseline</b>        |                      |                      |                      |                           |                       |
| Yes                                      | 102(27.9)            | 126(34.5)            | 137(37.5)            | 1.14(0.83-1.55)           | 0.415                 |
| No                                       | 81(30.3)             | 80(30.0)             | 106(39.7)            | 1.00                      |                       |
| <b>Frequency of Meeting with Peer</b>    |                      |                      |                      |                           |                       |

|                                    |           |           |           |                 |        |  |
|------------------------------------|-----------|-----------|-----------|-----------------|--------|--|
| Users at Baseline                  |           |           |           |                 |        |  |
| none                               | 25(31.3)  | 28(35.0)  | 27(33.8)  | 0.89(0.54-1.47) | 0.645  |  |
| 1-4/month                          | 44(27.5)  | 55(34.4)  | 61(38.1)  | 1.11(0.75-1.64) | 0.595  |  |
| 1-6/week                           | 46(28.6)  | 54(33.5)  | 61(37.9)  | 1.13(0.76-1.67) | 0.547  |  |
| > 1/day                            | 68(29.4)  | 69(29.9)  | 94(40.7)  | 1.00            |        |  |
| Multiple Sex Partners at Baseline  |           |           |           |                 |        |  |
| Yes                                | 26(23.6)  | 37(33.6)  | 47(42.7)  | 1.35(0.90-2.03) | 0.148  |  |
| No                                 | 157(30.1) | 169(32.4) | 196(37.5) | 1.00            |        |  |
| Average Maintenance Doses (ml/day) |           |           |           |                 |        |  |
| ≥60                                | 94(38.4)  | 84(34.3)  | 67(27.3)  | 0.49(0.36-0.68) | <0.001 |  |
| <60                                | 89(23.0)  | 122(31.5) | 176(45.5) | 1.00            |        |  |
| Percentages of MMT Attendance (%)  |           |           |           |                 |        |  |
| <20                                | 7(5.5)    | 44(34.6)  | 76(59.8)  | 4.74(3.01-7.47) | <0.001 |  |
| 20-                                | 34(24.3)  | 53(37.9)  | 53(37.9)  | 1.74(1.16-2.64) | 0.008  |  |
| 50-                                | 52(37.4)  | 42(30.2)  | 45(32.4)  | 1.24(0.83-1.84) | 0.294  |  |
| ≥80%                               | 90(39.8)  | 67(29.6)  | 69(30.5)  | 1.00            |        |  |

1 <sup>a</sup>OR: Odds Ratio, CI: Confidence Interval;

2 <sup>b</sup>Obtained from multivariate ordinal logistic regression analysis adjusting for potential confounding variables listed  
3 in the table;

4 \*Proportions were calculated in the row.

5

1 Table3. Self-reported risk behaviors among urine morphine (+) participants during the study  
 2 period (n=440)

| Characteristics               | <40%     | 40%-80%   | >80%      | Total     |
|-------------------------------|----------|-----------|-----------|-----------|
|                               | No. (%)  | No. (%)   | No. (%)   | No. (%)   |
| Drug Use (n=440)              |          |           |           |           |
| Yes                           | 61(39.4) | 111(68.1) | 107(87.7) | 279(63.4) |
| No                            | 94(60.6) | 52(31.9)  | 15(12.3)  | 161(36.6) |
| Injected Drugs (n=279)        |          |           |           |           |
| Yes                           | 48(78.7) | 96(86.5)  | 102(95.3) | 246(88.2) |
| No                            | 13(21.3) | 15(13.5)  | 5(4.7)    | 33(11.8)  |
| Shared Needles (n=246)        |          |           |           |           |
| Yes                           | 7(14.6)  | 21(21.9)  | 23(22.5)  | 51(20.7)  |
| No                            | 41(85.4) | 75(78.1)  | 79(77.5)  | 195(79.3) |
| Sex Activity (n=440)          |          |           |           |           |
| Yes                           | 76(49.0) | 99(60.7)  | 76(62.3)  | 251(57.0) |
| No                            | 79(51.0) | 64(39.3)  | 46(37.3)  | 189(43.0) |
| Multiple Sex Partners (n=251) |          |           |           |           |
| Yes                           | 21(27.9) | 37(37.4)  | 14(18.4)  | 72(28.7)  |
| No                            | 55(72.4) | 62(62.6)  | 62(81.6)  | 179(71.3) |
| Condom Use (n=251)            |          |           |           |           |
| Yes                           | 47(61.8) | 56(56.6)  | 47(61.8)  | 150(59.8) |
| No                            | 29(38.2) | 43(43.4)  | 29(38.2)  | 101(40.2) |
| Sex for Drugs (n=180)         |          |           |           |           |
| Yes                           | 7(17.5)  | 14(19.4)  | 3(4.4)    | 24(13.3)  |
| No                            | 33(82.5) | 58(80.6)  | 65(95.6)  | 156(86.7) |

3  
 4  
 5

## STROBE Statement—checklist of items that should be included in reports of observational studies

|                              | Item No | Recommendation                                                                                                                                                                                                                                                                                                                                                                                                                                                                                                                                                                                                                                                                                                                                                      |
|------------------------------|---------|---------------------------------------------------------------------------------------------------------------------------------------------------------------------------------------------------------------------------------------------------------------------------------------------------------------------------------------------------------------------------------------------------------------------------------------------------------------------------------------------------------------------------------------------------------------------------------------------------------------------------------------------------------------------------------------------------------------------------------------------------------------------|
| <b>Title and abstract</b>    | 1       | (a) Indicate the study's design with a commonly used term in the title or the abstract<br><a href="#">Line 6, page 2</a><br>(b) Provide in the abstract an informative and balanced summary of what was done and what was found<br><a href="#">Line 3, page 2; line 16-19, page 2</a>                                                                                                                                                                                                                                                                                                                                                                                                                                                                               |
| <b>Introduction</b>          |         |                                                                                                                                                                                                                                                                                                                                                                                                                                                                                                                                                                                                                                                                                                                                                                     |
| Background/rationale         | 2       | Explain the scientific background and rationale for the investigation being reported<br><a href="#">Line 18-22, page 4; line 1-4, page 5</a>                                                                                                                                                                                                                                                                                                                                                                                                                                                                                                                                                                                                                        |
| Objectives                   | 3       | State specific objectives, including any prespecified hypotheses<br><a href="#">Line 4-7, page 5</a>                                                                                                                                                                                                                                                                                                                                                                                                                                                                                                                                                                                                                                                                |
| <b>Methods</b>               |         |                                                                                                                                                                                                                                                                                                                                                                                                                                                                                                                                                                                                                                                                                                                                                                     |
| Study design                 | 4       | Present key elements of study design early in the paper<br><a href="#">Line 11-14, page 6</a>                                                                                                                                                                                                                                                                                                                                                                                                                                                                                                                                                                                                                                                                       |
| Setting                      | 5       | Describe the setting, locations, and relevant dates, including periods of recruitment, exposure, follow-up, and data collection<br><a href="#">Line 11-14, page 6; line 18-21, page 6</a>                                                                                                                                                                                                                                                                                                                                                                                                                                                                                                                                                                           |
| Participants                 | 6       | (a) <i>Cohort study</i> —Give the eligibility criteria, and the sources and methods of selection of participants. Describe methods of follow-up<br><a href="#">Line 14-17, page 6; line 19-20, page 7</a><br><i>Case-control study</i> —Give the eligibility criteria, and the sources and methods of case ascertainment and control selection. Give the rationale for the choice of cases and controls<br><i>Cross-sectional study</i> —Give the eligibility criteria, and the sources and methods of selection of participants<br>(b) <i>Cohort study</i> —For matched studies, give matching criteria and number of exposed and unexposed<br>-----<br><i>Case-control study</i> —For matched studies, give matching criteria and the number of controls per case |
| Variables                    | 7       | Clearly define all outcomes, exposures, predictors, potential confounders, and effect modifiers. Give diagnostic criteria, if applicable<br><a href="#">Line 22, page 6; line 1-22, page 7; line 1-13, page 8</a>                                                                                                                                                                                                                                                                                                                                                                                                                                                                                                                                                   |
| Data sources/<br>measurement | 8*      | For each variable of interest, give sources of data and details of methods of assessment (measurement). Describe comparability of assessment methods if there is more than one group<br><a href="#">Line 22, page 6; line 1-22, page 7; line 1-13, page 8</a>                                                                                                                                                                                                                                                                                                                                                                                                                                                                                                       |
| Bias                         | 9       | Describe any efforts to address potential sources of bias<br><a href="#">Line 7-10, page 8; line 11-13, page 7</a>                                                                                                                                                                                                                                                                                                                                                                                                                                                                                                                                                                                                                                                  |
| Study size                   | 10      | Explain how the study size was arrived at<br><a href="#">Line 11-14, page 6</a>                                                                                                                                                                                                                                                                                                                                                                                                                                                                                                                                                                                                                                                                                     |
| Quantitative variables       | 11      | Explain how quantitative variables were handled in the analyses. If applicable, describe which groupings were chosen and why<br><a href="#">Line 16, page 8; line 21-22, page 7; line 1-4, page 8</a>                                                                                                                                                                                                                                                                                                                                                                                                                                                                                                                                                               |

|    |                     |                                                                                            |
|----|---------------------|--------------------------------------------------------------------------------------------|
| 1  |                     |                                                                                            |
| 2  |                     |                                                                                            |
| 3  | Statistical methods | 12                                                                                         |
| 4  |                     | (a) Describe all statistical methods, including those used to control for confounding      |
| 5  |                     | <a href="#">Line 16-20, page 8</a>                                                         |
| 6  |                     | (b) Describe any methods used to examine subgroups and interactions                        |
| 7  |                     | (c) Explain how missing data were addressed                                                |
| 8  |                     | (d) <i>Cohort study</i> —If applicable, explain how loss to follow-up was addressed        |
| 9  |                     | <i>Case-control study</i> —If applicable, explain how matching of cases and controls was   |
| 10 |                     | addressed                                                                                  |
| 11 |                     | <i>Cross-sectional study</i> —If applicable, describe analytical methods taking account of |
| 12 |                     | sampling strategy                                                                          |
| 13 |                     | (e) Describe any sensitivity analyses                                                      |

Continued on next page

For peer review only

**Results**

|                  |     |                                                                                                                                                                                                                                                     |
|------------------|-----|-----------------------------------------------------------------------------------------------------------------------------------------------------------------------------------------------------------------------------------------------------|
| Participants     | 13* | (a) Report numbers of individuals at each stage of study—eg numbers potentially eligible, examined for eligibility, confirmed eligible, included in the study, completing follow-up, and analysed<br><a href="#">Line 11-14, page 6</a>             |
|                  |     | (b) Give reasons for non-participation at each stage<br><a href="#">Line 3, page 9; line 11-12, page 10</a>                                                                                                                                         |
|                  |     | (c) Consider use of a flow diagram                                                                                                                                                                                                                  |
| Descriptive data | 14* | (a) Give characteristics of study participants (eg demographic, clinical, social) and information on exposures and potential confounders<br><a href="#">Table 1, line 2-7, page 9</a>                                                               |
|                  |     | (b) Indicate number of participants with missing data for each variable of interest<br><a href="#">Table 1-3</a>                                                                                                                                    |
|                  |     | (c) <i>Cohort study</i> —Summarise follow-up time (eg, average and total amount)<br><a href="#">Line 18-21, page 6</a>                                                                                                                              |
| Outcome data     | 15* | <i>Cohort study</i> —Report numbers of outcome events or summary measures over time<br><a href="#">line 20-22, page 9</a>                                                                                                                           |
|                  |     | <i>Case-control study</i> —Report numbers in each exposure category, or summary measures of exposure                                                                                                                                                |
|                  |     | <i>Cross-sectional study</i> —Report numbers of outcome events or summary measures                                                                                                                                                                  |
| Main results     | 16  | (a) Give unadjusted estimates and, if applicable, confounder-adjusted estimates and their precision (eg, 95% confidence interval). Make clear which confounders were adjusted for and why they were included<br><a href="#">Table 2, page 24-25</a> |
|                  |     | (b) Report category boundaries when continuous variables were categorized<br><a href="#">Table 1, page 22-23; line 20-22, page 9</a>                                                                                                                |
|                  |     | (c) If relevant, consider translating estimates of relative risk into absolute risk for a meaningful time period                                                                                                                                    |
| Other analyses   | 17  | Report other analyses done—eg analyses of subgroups and interactions, and sensitivity analyses<br><a href="#">Line 10-15, page 10</a>                                                                                                               |

**Discussion**

|                  |    |                                                                                                                                                                                                                                                                                                 |
|------------------|----|-------------------------------------------------------------------------------------------------------------------------------------------------------------------------------------------------------------------------------------------------------------------------------------------------|
| Key results      | 18 | Summarise key results with reference to study objectives<br><a href="#">Line 5-6, page 11; line 13 page 11; line 1-2, page 12; line 7-8 page 12; line 17-19, page 12; line 1, page 13</a>                                                                                                       |
| Limitations      | 19 | Discuss limitations of the study, taking into account sources of potential bias or imprecision. Discuss both direction and magnitude of any potential bias<br><a href="#">Line 18-22, page 13; line 1-3, page 14</a>                                                                            |
| Interpretation   | 20 | Give a cautious overall interpretation of results considering objectives, limitations, multiplicity of analyses, results from similar studies, and other relevant evidence<br><a href="#">Line 7-10, page 11; line 14-20, page 11; line 3-5, page 12; line 7-11, page 12; line 2-7, page 13</a> |
| Generalisability | 21 | Discuss the generalisability (external validity) of the study results<br><a href="#">Line 4-10, page 14</a>                                                                                                                                                                                     |

**Other information**

|         |    |                                                                                                                                                               |
|---------|----|---------------------------------------------------------------------------------------------------------------------------------------------------------------|
| Funding | 22 | Give the source of funding and the role of the funders for the present study and, if applicable, for the original study on which the present article is based |
|---------|----|---------------------------------------------------------------------------------------------------------------------------------------------------------------|

1  
2  
3  
4  
5  
6  
7  
8  
9  
10  
11  
12  
13  
14  
15  
16  
17  
18  
19  
20  
21  
22  
23  
24  
25  
26  
27  
28  
29  
30  
31  
32  
33  
34  
35  
36  
37  
38  
39  
40  
41  
42  
43  
44  
45  
46  
47  
48  
49  
50  
51  
52  
53  
54  
55  
56  
57  
58  
59  
60

Line 1-5, page 15

\*Give information separately for cases and controls in case-control studies and, if applicable, for exposed and unexposed groups in cohort and cross-sectional studies.

**Note:** An Explanation and Elaboration article discusses each checklist item and gives methodological background and published examples of transparent reporting. The STROBE checklist is best used in conjunction with this article (freely available on the Web sites of PLoS Medicine at <http://www.plosmedicine.org/>, Annals of Internal Medicine at <http://www.annals.org/>, and Epidemiology at <http://www.epidem.com/>). Information on the STROBE Initiative is available at [www.strobe-statement.org](http://www.strobe-statement.org).

For peer review only

# BMJ Open

## Positive Percentages of Urine Morphine Tests among Methadone Maintenance Treatment Clients with HIV/AIDS during the First 12 Months after Treatment Initiation in Guangdong Province, China

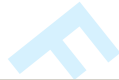

|                                 |                                                                                                                                                                                                                                                                                                                                                                                                                                                                                                                                                                                                                                                                                                                                                                                                                                                                                       |
|---------------------------------|---------------------------------------------------------------------------------------------------------------------------------------------------------------------------------------------------------------------------------------------------------------------------------------------------------------------------------------------------------------------------------------------------------------------------------------------------------------------------------------------------------------------------------------------------------------------------------------------------------------------------------------------------------------------------------------------------------------------------------------------------------------------------------------------------------------------------------------------------------------------------------------|
| Journal:                        | <i>BMJ Open</i>                                                                                                                                                                                                                                                                                                                                                                                                                                                                                                                                                                                                                                                                                                                                                                                                                                                                       |
| Manuscript ID                   | bmjopen-2016-014237.R1                                                                                                                                                                                                                                                                                                                                                                                                                                                                                                                                                                                                                                                                                                                                                                                                                                                                |
| Article Type:                   | Research                                                                                                                                                                                                                                                                                                                                                                                                                                                                                                                                                                                                                                                                                                                                                                                                                                                                              |
| Date Submitted by the Author:   | 29-Nov-2016                                                                                                                                                                                                                                                                                                                                                                                                                                                                                                                                                                                                                                                                                                                                                                                                                                                                           |
| Complete List of Authors:       | Luo, Xiaofeng; Sun Yat-Sen University, Faculty of Medical Statistics and Epidemiology, School of Public Health;Sun Yat-sen Center for Migrant Health Policy<br>Gong, Xiao; Sun Yat-Sen University, Faculty of Medical Statistics and Epidemiology, School of Public Health;Sun Yat-sen Center for Migrant Health Policy<br>Zhao, Peizhen; Guangdong Provincial Center for Skin Disease and STI Control<br>Zou, Xia; Sun Yat-Sen University, Faculty of Medical Statistics and Epidemiology, School of Public Health;Sun Yat-sen Center for Migrant Health Policy<br>Chen, Wen; Sun Yat-Sen University, Faculty of Medical Statistics and Epidemiology, School of Public Health;Sun Yat-sen Center for Migrant Health Policy<br>Ling, Li; Sun Yat-sen University, Faculty of Medical Statistics and Epidemiology, School of Public Health;Sun Yat-sen Center for Migrant Health Policy |
| <b>Primary Subject Heading</b>: | Addiction                                                                                                                                                                                                                                                                                                                                                                                                                                                                                                                                                                                                                                                                                                                                                                                                                                                                             |
| Secondary Subject Heading:      | Epidemiology, HIV/AIDS                                                                                                                                                                                                                                                                                                                                                                                                                                                                                                                                                                                                                                                                                                                                                                                                                                                                |
| Keywords:                       | Heroin Use, Methadone Maintenance Treatment (MMT), HIV, China                                                                                                                                                                                                                                                                                                                                                                                                                                                                                                                                                                                                                                                                                                                                                                                                                         |
|                                 |                                                                                                                                                                                                                                                                                                                                                                                                                                                                                                                                                                                                                                                                                                                                                                                                                                                                                       |

SCHOLARONE™  
Manuscripts



1  
2  
3  
4 1 **Positive Percentages of Urine Morphine Tests among Methadone Maintenance Treatment Clients**  
5  
6 2 **with HIV/AIDS during the First 12 Months after Treatment Initiation in Guangdong Province,**  
7  
8  
9 3 **China**

10  
11 4 Xiaofeng Luo<sup>1,2</sup>, Xiao Gong<sup>1,2</sup>, Peizhen Zhao<sup>3</sup>, Xia Zou<sup>1,2</sup>, Wen Chen<sup>1,2</sup>, Li Ling<sup>1,2\*</sup>

12  
13  
14 5 <sup>1</sup> Faculty of Medical Statistics and Epidemiology, School of Public Health, Sun Yat-sen University, 74  
15  
16 6 Zhongshan Road II, Guangzhou 510080, China.

17  
18 7 <sup>2</sup> Sun Yat-sen Center for Migrant Health Policy, Sun Yat-sen University, 74 Zhongshan Road II,  
19  
20  
21 8 Guangzhou 510080, China.

22  
23  
24 9 <sup>3</sup> Guangdong Provincial Center for Skin Disease and STI Control, No. 2 Lujing Road, Guangzhou  
25  
26 10 510095, China.

27  
28  
29  
30  
31 12 **\*Correspondence:** Li Ling, PhD, Professor. Faculty of Medical Statistics and Epidemiology, School of  
32  
33  
34 13 Public Health, Sun Yat-sen University, 74 Zhongshan Road II, Guangzhou 510080, China; Sun Yat-sen  
35  
36 14 Center for Migrant Health Policy, Sun Yat-sen University, 74 Zhongshan Road II, Guangzhou 510080,  
37  
38 15 China. Email: lingli@mail.sysu.edu.cn; Tel/Fax: +86-20-87333319.

39  
40  
41 16 **Running head:** Heroin use among MMT clients with HIV/AIDS in Guangdong  
42  
43  
44 17

45  
46 18 **Word Count:** 2,977 for main text including sub-headings, 208 for abstract  
47  
48  
49 19

1  
2  
3  
4  
5  
6  
7  
8  
9  
10  
11  
12  
13  
14  
15  
16  
17  
18  
19  
20  
21  
22  
23  
24  
25  
26  
27  
28  
29  
30  
31  
32  
33  
34  
35  
36  
37  
38  
39  
40  
41  
42  
43  
44  
45  
46  
47  
48  
49  
50  
51  
52  
53  
54  
55  
56  
57  
58  
59  
60

1 **Abstract**

2 **Objective:** We aimed to assess the positive percentages of urine morphine tests and correlates among  
3 MMT clients with HIV/AIDS in Guangdong, China.

4 **Setting:** Fourteen MMT clinics located in 9 cities of Guangdong were chosen as study sites.

5 **Participants:** In this study, we reviewed retrospectively 642 clients with opioid dependence, HIV  
6 seropositive, 18 years or older, providing informed consent and urine sample during the study period.

7 **Primary and secondary outcome measures:** The positive percentages of urine morphine tests were  
8 calculated and underlying predictors were estimated.

9 **Results:** There were 38.4% participants with positive percentages of urine morphine tests over 80%  
10 during the first 12 months after treatment initiation. Lower percentages of continued heroin use were  
11 associated with being young ( $OR_{\leq 30}=0.45$ , 95%CI:0.26-0.80;  $OR_{31-}=0.63$ , 95%CI:0.39-1.00;  
12  $OR_{36-}=0.65$ , 95%CI:0.42-1.01), financial sources depending on family or friends ( $OR=0.71$ ,  
13 95%CI:0.51-0.98) and higher maintenance doses ( $OR=0.49$ , 95%CI:0.36-0.68). Higher percentages of  
14 continued heroin use were associated with having harmonious family relationship ( $OR=1.46$ ,  
15 95%CI:1.01-2.12) and poorer MMT attendance ( $OR_{<20\%}=4.74$ , 95%CI:3.01-7.47;  $OR_{20\%}=1.74$ ,  
16 95%CI:1.16-2.64).

17 **Conclusions:** High positive percentages of urine morphine tests remain prevalent among MMT clients  
18 with HIV/AIDS in Guangdong. The present findings have implications for reconsidering adjusting the  
19 current MMT doses and taking effective measures to facilitate attendance in order to decrease heroin  
20 use and ultimately improve the effectiveness among these sub-group MMT clients.

21 **Key words:** Heroin Use; Methadone Maintenance Treatment (MMT); HIV; China

22

1  
2  
3  
4 **1 Highlights**

5  
6 1. This is a long-term consecutive study specifically designed to examine concurrent heroin use  
7  
8 among HIV-positive MMT clients in China.  
9

10 2. This study mainly focused on positive percentages of urine morphine tests among HIV-positive  
11  
12 MMT clients in China.  
13  
14

15  
16 **6 Limitations**

17  
18 1. Self-reported data are subject to recall bias or deliberate concealment. Family relationship variable  
19  
20 was a client self-perceived indicator and had no standardized measurement for this dimension so  
21  
22 far.  
23  
24

25  
26 2. China is experiencing a significant increase in the use of new drugs, but this study did not consider  
27  
28 it. In addition, we failed to obtain the ART (anti-retroviral treatment) information, and future  
29  
30 studies should be extended to analyze ART as predictor variable to continued heroin use.  
31  
32

33  
34 3. Frequent drop-out always exists among clients in MMT programs. Most of clients would drop out  
35  
36 within a few months which had been widely noticed. For the drop-outs, many of them probably  
37  
38 were tested only once or twice but all these tests were positive, which might over-estimate the  
39  
40 percentages of heroin use. In addition, we only examined the percentages of heroin use during the  
41  
42 first 12 months after receiving MMT due to the limited sample size and high drop-out.  
43  
44  
45

46  
47  
48  
49  
50  
51  
52  
53  
54  
55  
56  
57  
58  
59  
60

## 1 Introduction

2 In China, illicit drug use has increased dramatically since the 1980s [1]. There were cumulatively  
3 registered 2.95 million drug users by the end of 2014 and 480,000 newly registrations in 2014  
4 nationwide [2]. Although China recently is experiencing a significant increase in the use of new-type  
5 drugs, heroin still remains the major illicit used drug among drug users [2]. The earliest HIV case was  
6 identified among intravenous drug users (IDUs) in Southern Yunnan province in 1989 [3]. The early  
7 spread of HIV epidemics in China mainly attributed to intravenous drug use (IDU) [4]. As of 2013,  
8 437,000 people lived with HIV/AIDS in China (including 263,000 people living with HIV and 174,000  
9 AIDS patients), accounting for 0.033% of the total population in China; and sentinel surveillance data  
10 showed the HIV/AIDS prevalence was 6.3% among IDUs [5].

11 Globally, methadone maintenance treatment (MMT) is the most widely used pharmacological  
12 treatment for opioid dependence. China has operated MMT program as a national strategy to combat  
13 the joint threat of drug use and HIV/AIDS since 2004 [6]. For decades, MMT program has achieved its  
14 crucial effectiveness not only in reducing heroin use [7] but also in preventing the spread of HIV [8, 9].  
15 Meanwhile, studies have shown that MMT is beneficial in reducing drug-related criminal activities  
16 [10] and drug-related mortality [11]. In addition, for the HIV-positive individuals, MMT could facilitate  
17 the adherence to antiretroviral therapy [12]. By the end of April 2015, China has 767 MMT clinics in  
18 28 provinces across the nation, serving nearly 190,000 clients [13].

19 However, many clients did not completely abstain from heroin and exhibited continued heroin use  
20 while in MMT [14-17]. Continued heroin use could lead to negative MMT treatment outcomes among  
21 clients [18]. Heroin addicts still contribute a high mortality even with MMT [19]. Overdosed drug  
22 intake remains the most common cause of death among MMT clients [20]. After a period of abstinence

1  
2  
3  
4 1 via MMT, the heroin tolerance of clients would decrease, thus overdosed intake may become more  
5  
6 2 prevalent [21, 22]. Individuals with HIV/AIDS are a special group among MMT clients. A  
7  
8 3 meta-analysis showed that HIV seropositivity would increase the mortality risk of overdose [23]. In  
9  
10 4 addition, continued heroin use would decrease the retention rate among MMT clients with HIV/AIDS  
11  
12 5 [24]. Therefore, heroin use deserves more attention among MMT clients with HIV/AIDS. To date,  
13  
14 6 limited data are available on heroin use among MMT clients with HIV/AIDS in China [14, 25] and  
15  
16 7 about the higher percentages of heroin use is even less. To fill this gap, we applied this study is to  
17  
18 8 examine the higher percentages of heroin use among MMT clients with HIV/AIDS in Guangdong.  
19  
20  
21  
22  
23  
24  
25  
26  
27  
28  
29  
30  
31  
32  
33  
34  
35  
36  
37  
38  
39  
40  
41  
42  
43  
44  
45  
46  
47  
48  
49  
50  
51  
52  
53  
54  
55  
56  
57  
58  
59  
60

## 1 **Methods**

### 2 **Ethics Statement**

3 The Institutional Review Board (IRB) of the School of Public Health (Sun Yat-sen  
4 University ,Guangzhou, China) reviewed and approved the study protocol. All study participants were  
5 asked to provide written informed consent.

### 6 **Study Site and Participants**

7 Guangdong, located in the Southern coast of China, is one of the most developed provinces.  
8 Meanwhile, Guangdong also is one of the HIV/AIDS and drug epidemic areas because it has  
9 cumulative reported 48,718 HIV-positive cases, ranking fifth among provinces in China as of October  
10 2014 [26], in addition, it has one-sixth of totally registered drug users in China [27].

11 This study was conducted in 14 MMT clinics located in 9 cities of Guangdong (According to  
12 whether the 1-year retention rate is above or below 50%, the 61 MMT clinics were divided into two  
13 groups, and seven clinics were randomly selected from each group [28]). We got permission and  
14 authorization to use and retrieve part of data for the selected MMT clinics from the Chinese National  
15 MMT Program data system. Between July 2006 and December 2013, there were 9,397 entrants; among  
16 them, 8,912 (94.8%) received HIV test at entry and 485 (5.2%) refused to be test. Of the remaining 805  
17 MMT clients who tested HIV positive at MMT entry, 81.1% (653 of 805) participated in this study. In  
18 this study, participants were eligible if they were (1) diagnosed with opioid dependence according to  
19 the International Classification of Diseases (10th Revision); (2) 18 years or older; (3) tested to be  
20 HIV-positive at entry; (4) able to provide informed consent; and (5) able to provide urine specimen to  
21 morphine test.

22 In this study, “drop-out” was defined as a participant failing to continue MMT for 14 consecutive

1 days [28]. In accordance with high drop-out rates, the study period could be classified into two categories: one was defined as the duration between enrollment and dropout, the other was defined as the duration between enrolment and the end of the first 12 months.

#### 4 **Measures**

##### 5 ***Self-reported Risk Behaviors***

6 At admission, as well as 6<sup>th</sup> and 12<sup>th</sup> month respectively, each participant was requested to complete a questionnaire covering demographic characteristics, drug use history including injecting drug and sharing needle/equipment, sexual activity history, and condom use status.

9 A client was regarded as having corresponding risk behaviors during the study period if he/she reported those behaviors either 6<sup>th</sup> or 12<sup>th</sup> interview (i.e. drug use behaviors including injecting drug and sharing needle/equipment; and risk sexual activities including, multiple sex partner, inconsistent condom use and sex trade for drugs.).

##### 13 ***Methadone Maintenance Doses and Attendance***

14 In China, to insure MMT security, clients are forbidden to take Methadone outside the clinic. Once enrolled in MMT, the clients must go to the clinic at consultation hours daily to take the prescribed doses of Methadone under the supervision of clinic staff, and the daily doses and date were routinely recorded in the national unified MMT management system. The treatment cost was RMB 10 Yuan (USD: 1.5 Dollar) per day regardless of the client' intake doses and times.

19 Average maintenance dose was obtained via computing the mean of daily prescribed doses.

20 The percentage of MMT attendance was calculated based on proportion of days that a client actually received the doses over the study period.

##### 22 ***Positive Percentages of Urine Morphine Tests during the Study Period***

1  
2  
3  
4 1 A positive result of urine morphine test generally means heroin use by the clients within a few  
5  
6 2 days. Urine-based morphine tests were monthly performed on a random day during the study period.  
7

8  
9 3 The percentage of heroin use was calculated based on the number of positive urine morphine test  
10  
11 4 results and the number of total urine test times during the study period. Based on the urine morphine  
12  
13 5 tests, the clients were currently grouped as “urine morphine (+)” and “urine morphine (-)”. Additionally,  
14  
15 6 the positive percentages were grouped as <40%, 40-80% and >80% based on the data distribution.  
16  
17

### 18 19 7 *HIV and Urine Morphine Tests*

20  
21 8 Except for those who were already confirmed as HIV-positive prior this study, each client was  
22  
23 9 invited to receive HIV testing. HIV infection status was screened using an enzyme-linked  
24  
25 10 immunosorbent assay (ELISA) technique (Beijing BGI-GBI Biotech Co., Ltd, Beijing, China). Positive  
26  
27 11 blood specimens for HIV were confirmed using a Western blot assay (Abbott, MP Biomedicals, LLC,  
28  
29 12 Singapore) by the local Centers for Disease Control (CDC). According to related national guidelines,  
30  
31 13 pre- and post- test counseling services were provided.  
32  
33

34  
35 14 Random urine morphine status was screened using a Morphine Diagnostic Kit (Colloidal Gold)  
36  
37 15 technique (ABON Biopharm Co., Ltd, Hangzhou, China).  
38

### 39 40 41 16 **Statistical Analysis**

42  
43 17 Statistical analyses were performed using SPSS 17.0 for Windows (SPSS Inc., Chicago).  
44  
45 18 Categorical variables were described with percentages. Multivariate ordinal logistic regression analysis  
46  
47 19 was conducted to predict higher percentages of heroin use from baseline information including  
48  
49 20 demographic, drug use and multiple sex partners, as well as average maintenance dose and percentages  
50  
51 21 of MMT attendance during the study period among the MMT clients with HIV/AIDS. Any  $p < 0.05$  was  
52  
53 22 considered to be statistically significant.  
54  
55  
56  
57  
58  
59  
60



## 1 Results

### 2 *Study Participants and Demographic Characteristics*

3 Among the 642 participants, 138(21.5%) were elder than 40; 600 (93.5%) were males; 636 (99.1%)  
4 were ethnic Han (China's predominant ethnic group), 343 (53.4%) were never married; 25.7% just had  
5 elementary or lower education; 63.9% were unemployed; only 23.7% had harmonious family  
6 relationship; and 61.7% obtained financial sources from their family or friends (Table 1).

### 7 *Heroin Use and Multiple Sex Partner at Baseline*

8 Table 1 presents baseline information on heroin use. Of the participants, 78.3% had used heroin  
9 for more than 10 years; 64.3% participants used heroin at least 3 times daily on average; the vast  
10 majority (97.7%) abused powdered heroin and 98.6% ever administered drug by injection. Among the  
11 IDUs, 58.1% ever shared intravenous needles. Only 12.5% never met the peer users.

12 Of these participants, 17.4% had had sexual activity with multiple sex partner (Table 1).

### 13 *Average Maintenance Doses and Attendance*

14 Among all participants, 60.7% had received doses below 60 ml and the average maintenance dose  
15 was (57.9 ± 27.1) ml.

16 In addition, 20.1% participants' MMT attendance percentages were less than 20% and only 36.3%  
17 were over 80% (Table 1).

### 18 *Positive Percentages of Urine Morphine Tests during the Study Period*

19 The median positive percentage of urine morphine tests was 52.3% for 2006, 47.9% for 2007, 47.0%  
20 for 2008, 45.1% for 2009, 44.5% for 2010, 47.1% for 2011, 23.3% for 2012 and 55.4% for 2013,  
21 respectively (Table 2). Among the 632 urine morphine (+) clients, positive percentages of urine  
22 morphine tests that <40%, 40%-80% and >80% were 29.0%, 32.6% and 38.4% respectively (Table 3).

1  
2  
3  
4 1 After adjusted for potential confounding variables listed in the table, multiple ordinal logistic  
5  
6 2 regression analysis indicated that a higher percentage of heroin use was independently associated with  
7  
8 3 age, family relationship, financial sources, average MMT doses and percentage of MMT attendance.  
9  
10 4 Participants who were younger ( $OR_{\leq 30}=0.45$ , 95%CI: 0.26-0.80;  $OR_{31-35}=0.63$ , 95%CI: 0.39-1.00;  
11  
12 5  $OR_{36-40}=0.65$ , 95%CI: 0.42-1.01), got money from family or friends ( $OR=0.71$ , 95%CI: 0.51-0.98) and  
13  
14 6 had MMT doses over 60 ml ( $OR=0.49$ , 95%CI: 0.36-0.68) were more likely to be tested as having  
15  
16 7 lower percentages of heroin use; and those who had harmonious family relationships ( $OR=1.46$ , 95%CI:  
17  
18 8 1.01-2.12) and poor MMT attendance percentages ( $OR_{\leq 20}=4.74$ , 95%CI: 3.01-7.47;  $OR_{20-}=1.74$ , 95%CI:  
19  
20 9 1.16-2.64) were more likely to have higher percentages of heroin use (Table 4).  
21  
22  
23  
24  
25

#### 26 ***Self-reported High Risk Behaviors during the Study Period***

27  
28  
29 11 Among the clients with urine morphine (+), 69.6% (440 of 632) and 47.0% (297 of 632) completed  
30  
31 12 the 6<sup>th</sup> and 12<sup>th</sup> month follow-up interviews respectively. Of the 440 clients completed at least one  
32  
33 13 follow-up interview, 78.3% ever used drugs, 88.2% used intravenous drugs, and 20.7% ever shared  
34  
35 14 intravenous needles; 57.0% were sexual active, 28.7% had sex with multiple sex partners, and 40.2%  
36  
37 15 never used condom during the sexual course. Also, 13.3% traded sex for drugs (Table 5).  
38  
39  
40  
41  
42  
43  
44  
45  
46  
47  
48  
49  
50  
51  
52  
53  
54  
55  
56  
57  
58  
59  
60

## 1 Discussion

2 Heroin use among MMT clients has been reported substantially worldwide [15, 16]. HIV-positive  
3 drug users are a unique subgroup for playing a “dual bridge” role in HIV transmission. This study is an  
4 extension of our previous study [25]. Our results were based on random, long-term and consecutive  
5 urine tests, which was blind to clients in case those continued heroin users deliberately avoid the test  
6 time.

7 Findings from the current analysis revealed that there were 38.4% participants with positive  
8 percentages of urine morphine tests over 80% during the first 12 months after treatment initiation.  
9 Given that continued heroin use might lead to adverse health outcomes [20, 23] and high drop-out rate  
10 [24] among MMT clients with HIV/AIDS, targeted interventions and control programs are urgently  
11 needed for this subgroup.

12 Compared to the young participants, the elders showed greater likelihood of continued heroin use.  
13 Many elders had turned from clinical latency stage to AIDS stage and they may experience more pain  
14 and psychological symptoms [29, 30]. Studies had shown that depressive symptoms are common  
15 among people with HIV infection [31, 32]. However, MMT improvements in depressive symptoms and  
16 the physical domain of QOL (quality of life) among HIV-positive heroin users were poorer than in  
17 those without HIV infection [33]. Also, most of them had lost the courage and confidence to live on.  
18 Culturally, stigma and discrimination towards drug use and HIV/AIDS might seriously impede the  
19 MMT attendance [34]. In addition, inappropriate perceptions of MMT should not be neglected [35].

20 Families play important roles in the life of drug users. Drug use and MMT is regarded as a family  
21 issue in China [36]. Harmonious family relationship could potentially encourage treatment participation  
22 and enhance compliance [25, 34]. A notable finding in our study was that the clients who had

1  
2  
3  
4 1 harmonious family relationship were more likely to use heroin, which contradicts previous studies [25,  
5  
6 34]. This is probably because the family members in harmonious family relationship have more  
7  
8  
9 3 tolerance towards them, which may subsequently indulge in their heroin use behavior. However, this  
10  
11 4 speculation requires further investigation.

12  
13  
14 5 Generally, high drug fee generally made the drug users can't afford it. In our study, 63.9% were  
15  
16 6 unemployed; for the employed, many only had short-term jobs. This may partly explain the reasons  
17  
18 7 why the clients whose financial sources depend on family or friends were less likely to use heroin.  
19  
20 8 Money from family or friends is meant to support basic life and is far not enough to meet drug  
21  
22 9 expenditure. Furthermore, family or friends' support might potentially supervise and encourage  
23  
24 10 treatment participation and compliance [36].

25  
26  
27  
28  
29 11 Higher Methadone doses would promote the retention rate in MMT [37]. An appropriate MMT  
30  
31 12 dose is the most effective in suppressing heroin use in treatment [18, 38]. The Methadone dose  
32  
33 13 recommended by US National Institutes of Health was  $\geq 60$  mg/day [39], and should be higher for  
34  
35 14 HIV-positive individuals [40]. Studies showed an adequate dose of Methadone (e.g., 80- 120 mgs/day)  
36  
37 15 would significantly reduce heroin use among clients within the first two months of treatment and  
38  
39 16 eventually either eliminated or significantly curtailed with time in treatment [41, 42]. We found 60.7%  
40  
41 17 participants' doses were less than 60 mg/day. Compared to those with higher doses, the clients with  
42  
43 18 lower doses were more likely to use heroin. Further researches are needed on appropriate doses of  
44  
45 19 Methadone and whether increasing doses could decrease the rate of continued heroin use.

46  
47  
48  
49  
50  
51 20 Without exception, treatment effectiveness relies upon sufficient levels of medication adherence.  
52  
53 21 MMT requires long-term or even life-long intake of Methadone at an adequate dose on a daily basis  
54  
55 22 [43]. We found that the lower attendance meant the higher percentage of heroin use. This was  
56  
57  
58  
59  
60

1  
2  
3  
4 1 consistent with our prior study [25]. Continued heroin users attended MMT programs irregularly and  
5  
6 2 the attendance significantly declined with the duration that they retained in treatment program [44].  
7  
8  
9 3 Poorer attendance seeded continued heroin use. In addition, misconceptions might predict dropout rates  
10  
11 4 and poor adherence among newly admitted MMT clients [45]. So, future research might need to  
12  
13 5 develop and/or integrate other necessary interventions to encourage client adherence to the treatment  
14  
15 6 program.

17  
18  
19 7 HIV-positive drug users have been regarded as a “dual risk” subgroup. They transmit HIV via  
20  
21 8 either sharing needles or having unprotected sexual intercourse with partners. Currently, sexual  
22  
23 9 transmission is the most prevalent spread pattern of HIV/AIDS in China [5]. Among the participants  
24  
25 10 who finished at least once interview, 20.7% ever shared needle; 28.7% ever had sex with multiple  
26  
27 11 partners; 40.2% never used condom and 13.3% had sex for drugs during the study period. Considering  
28  
29 12 the potential bridge role of those with dual risk behaviors in transmitting HIV to others, research on the  
30  
31 13 interaction of HIV-positive MMT clients and risk behaviors should be given high priority. Data showed  
32  
33 14 that changing unsafe drug use behaviors was more effective than changing unsafe sexual behaviors [17].  
34  
35 15 In future treatment procedures, physicians and nurses should play an active role in educating clients  
36  
37 16 about safe sex and encourage clients to use condoms.

38  
39  
40  
41  
42  
43  
44 17 This study is subject to certain limitations. Firstly, self-reported data are subject to recall bias or  
45  
46 18 deliberate concealment. Family relationship variable was a client self-perceived indicator and had no  
47  
48 19 standardized measurement for this dimension so far. Secondly, China is experiencing a significant  
49  
50 20 increase in the use of new drugs [2], but this study did not consider it. In addition, we failed to obtain  
51  
52 21 the ART (anti-retroviral treatment) information, and future studies should be extended to analyze ART  
53  
54 22 as predictor variable to continued heroin use. Thirdly, frequent drop-out always exists among clients in  
55  
56  
57  
58  
59  
60

1 MMT programs. Most of clients would drop out within a few months which had been widely noticed  
2  
3  
4 [17, 46]. For the drop-outs, many of them probably were tested only once or twice but all these tests  
5  
6  
7  
8  
9 were positive, which might over-estimate the percentages of heroin use. In addition, we only examined  
10  
11 the percentages of heroin use during the first 12 months after receiving MMT, and did not take 12+  
12  
13  
14 months into consideration due to the limited sample size and high drop-out.  
15

16 In summary, findings from this study provide important implications for future MMT programs  
17  
18 targeting continued heroin use among HIV-positive clients. Concretely, first, continuous and efficient  
19  
20 MMT consulting and health education interventions need to be conducted for reducing continued  
21  
22 heroin use. Interventions involving family members in supervision of participation and compliance  
23  
24 should be reinforced. Second, doses and attendance are crucial components affecting MMT' outcomes,  
25  
26  
27  
28 so how to prescribe an appropriate MMT dose and improve sufficient attendance have become issues of  
29  
30  
31  
32 great urgency.  
33

34  
35  
36  
37  
38  
39  
40  
41  
42  
43  
44  
45  
46  
47  
48  
49  
50  
51  
52  
53  
54  
55  
56  
57  
58  
59  
60

1  
2  
3  
4  
5  
6  
7  
8  
9  
10  
11  
12  
13  
14  
15  
16  
17  
18  
19  
20  
21  
22  
23  
24  
25  
26  
27  
28  
29  
30  
31  
32  
33  
34  
35  
36  
37  
38  
39  
40  
41  
42  
43  
44  
45  
46  
47  
48  
49  
50  
51  
52  
53  
54  
55  
56  
57  
58  
59  
60

## 1 **Role of Funding Source**

2 This study was supported by the National Natural Science Foundation of China (grant no.  
3 71173245 and 81473065 to L.L.) and China Medical Board (12-111 to L.L.).The funding agencies play  
4 no role in the study design, data collection, and data analysis, interpretation of study results and writing  
5 of the manuscript.

## 6 **Contributors**

7 XL designed the study, performed data analysis and wrote the draft manuscript. XG and PZ  
8 performed data analysis. XZ and WC collected the data. LL supervised the study. All authors  
9 contributed to the interpretation of the data and approved the final version for submission.

## 10 **Conflict of Interest**

11 The authors declare no conflicts of interest.

## 12 **Data Sharing Statement**

13 No additional unpublished data are available.

## 14 **Acknowledgements**

15 We are grateful to the staff of MMT clinics in the study site for their valuable assistance in subject  
16 recruitment and data collection. We appreciate the HIV-positive MMT participants spending time and  
17 sharing with us regarding their information.

18

**References:**

1. Zhao M, Ling W. HIV/AIDS and Drug Use in China—Interactions, Impacts, and Issues. *Substance Use & Misuse*. 2012; 47: 1015-1025.
2. The State Council Information Office of the People's Republic of China. 2014 annual report on drug situation in China., 2014.
3. Jia M, Luo H, Ma Y, Wang N, Smith K, Mei J, et al. The HIV epidemic in Yunnan Province, China, 1989-2007. *J Acquir Immune Defic Syndr*. 2010; 53 Suppl 1: S34-40.
4. Bao YP, Liu ZM. Systematic review of HIV and HCV infection among drug users in China. *International Journal of STD & AIDS*. 2009; 20: 399-405.
5. UNAIDS. 2014 China AIDS Response Progress Report., 2014.
6. Wu Z. Landmark government methadone maintenance program in mainland China. "15th International AIDS Conference", 2004.
7. Yin W, Hao Y, Sun X, Gong X, Li F, Li J, et al. Scaling up the national methadone maintenance treatment program in China: achievements and challenges. *International Journal of Epidemiology*. 2010; 39: ii29-ii37.
8. Zou X, Ling L, Zhang L. Trends and risk factors for HIV, HCV and syphilis seroconversion among drug users in a methadone maintenance treatment programme in China: a 7-year retrospective cohort study. *BMJ Open*. 2015; 5: e008162.
9. Dai J, Zhao L, Liang Y. Policy implementation of methadone maintenance treatment and HIV infection: evidence from Hubei province, China. *Subst Abuse Treat Prev Policy*. 2013; 8: 38.
10. Sun HM, Li XY, Chow EPF, Li T, Xian Y, Lu YH, et al. Methadone maintenance treatment programme reduces criminal activity and improves social well-being of drug users in China: a



- 1  
2  
3  
4 1 systematic review and meta-analysis. *BMJ Open*. 2015; 5: e005997-e005997.  
5  
6 11. Zhao Y, Shi CX, McGoogan JM, Rou K, Zhang F, Wu Z. Methadone maintenance treatment and  
7  
8 mortality in HIV-positive people who inject opioids in China. *Bulletin of the World Health*  
9  
10 *Organization*. 2013; 91: 93-101.  
11  
12 12. Reddon H, Milloy MJ, Simo A, Montaner J, Wood E, Kerr T. Methadone Maintenance Therapy  
13  
14 Decreases the Rate of Antiretroviral Therapy Discontinuation Among HIV-Positive Illicit Drug  
15  
16 Users. *AIDS and Behavior*. 2014; 18: 740-746.  
17  
18  
19  
20  
21 13. China TNHA. The national health and family planning commission published online., 2015.  
22  
23  
24 14. Wang R, Ding Y, Bai H, Duan S, Ye R, Yang Y, et al. Illicit Heroin and Methamphetamine Use  
25  
26 among Methadone Maintenance Treatment Patients in Dehong Prefecture of Yunnan Province,  
27  
28 China. *PLOS ONE*. 2015; 10: e0133431.  
29  
30  
31 15. Sullivan SG, Wu Z, Cao X, Liu E, Detels R. Continued drug use during methadone treatment in  
32  
33 China: A retrospective analysis of 19,026 service users. *Journal of Substance Abuse Treatment*.  
34  
35 2014; 47: 86-92.  
36  
37  
38 16. Li L, Lin C, Wan D, Zhang L, Lai W. Concurrent heroin use among methadone maintenance clients  
39  
40 in China. *Addictive Behaviors*. 2012; 37: 264-268.  
41  
42  
43 17. Zhang L, Chow EP, Zhuang X, Liang Y, Wang Y, Tang C, et al. Methadone maintenance treatment  
44  
45 participant retention and behavioural effectiveness in China: a systematic review and meta-analysis.  
46  
47 *PLoS One*. 2013; 8: e68906.  
48  
49  
50 18. Leri F, Bruneau J, Stewart J. Understanding polydrug use: review of heroin and cocaine co-use.  
51  
52 *Addiction*. 2003; 98: 7-22.  
53  
54  
55  
56 19. Jimenez-Treviño L, Saiz PA, García-Portilla MP, Díaz-Mesa EM, Sánchez-Lasheras F, Burón P, et  
57  
58  
59  
60

- 1  
2  
3  
4 1 al. A 25-year follow-up of patients admitted to methadone treatment for the first time: Mortality  
5  
6 2 and gender differences. *Addictive Behaviors*. 2011; 36: 1184-1190.  
7  
8  
9 3 20. McCowan C, Kidd B, Fahey T. Factors associated with mortality in Scottish patients receiving  
10  
11 4 methadone in primary care: retrospective cohort study. *BMJ*. 2009; 338: b2225.  
12  
13  
14 5 21. Darke S, Ross J, Hall W. Overdose among heroin users in Sydney, Australia: II. responses to  
15  
16 6 overdose. *Addiction*. 1996; 91: 413-7.  
17  
18  
19 7 22. Darke S, Ross J, Hall W. Overdose among heroin users in Sydney, Australia: I. Prevalence and  
20  
21 8 correlates of non-fatal overdose. *Addiction*. 1996; 91: 405-11.  
22  
23  
24 9 23. Green TC, McGowan SK, Yokell MA, Pouget ER, Rich JD. HIV infection and risk of overdose:: a  
25  
26 10 systematic review and meta-analysis. *AIDS*. 2012; 26: 403-417.  
27  
28  
29 11 24. Jiang H, Cao X, Wang C, Luo W, Li J, Rou K, et al. Study on the adherence and related  
30  
31 12 determinants among HIV-positive clients under methadone maintenance treatment in Dali, Yunnan  
32  
33 13 province from 2005 to 2013. *Chin J Epidemiol*. 2014; 35: 255-258.  
34  
35  
36 14 25. Luo X, Zhao P, Gong X, Zhang L, Tang W, Zou X, et al. Concurrent Heroin Use and Correlates  
37  
38 15 among Methadone Maintenance Treatment Clients: A 12-Month Follow-up Study in Guangdong  
39  
40 16 Province, China. *International Journal of Environmental Research and Public Health*. 2016; 13:  
41  
42 17 305.  
43  
44  
45  
46 18 26. NetEase. Guangdong had cumulatively reported 48,718 HIV-infected individuals, ranking fifth  
47  
48 19 position in China., 2014.  
49  
50  
51 20 27. Cn CO. Guangdong has the largest number of registered drug users (457,000), accounting for  
52  
53 21 one-sixth of the total registered drug users of China., 2014.  
54  
55  
56 22 28. Zhang L, Zou X, Zhang D, Li X, Zhao P, Ling L. Investigation of Repeat Client Drop-Out and  
57  
58  
59  
60

- 1  
2  
3  
4 1 Re-Enrolment Cycles in Fourteen Methadone Maintenance Treatment Clinics in Guangdong, China.  
5  
6 2 PLOS ONE. 2015; 10: e0139942.  
7  
8  
9 3 29. Rodriguez-Penney AT, Iudicello JE, Riggs PK, Doyle K, Ellis RJ, Letendre SL, et al.  
10  
11 4 Co-Morbidities in Persons Infected with HIV: Increased Burden with Older Age and Negative  
12  
13 5 Effects on Health-Related Quality of Life. AIDS Patient Care and STDs. 2013; 27: 5-16.  
14  
15  
16 6 30. Tsao JC, Plankey MW, Young MA. Pain, psychological symptoms and prescription drug misuse in  
17  
18 7 HIV: A literature review. J Pain Manag. 2012; 5: 111-118.  
19  
20  
21 8 31. Edelman EJ, Gordon K, Becker WC, Goulet JL, Skanderson M, Gaither JR, et al. Receipt of opioid  
22  
23 9 analgesics by HIV-infected and uninfected patients. J Gen Intern Med. 2013; 28: 82-90.  
24  
25  
26 10 32. Sherr L, Clucas C, Harding R, Sibley E, Catalan J. HIV and Depression - a systematic review of  
27  
28 11 interventions. PSYCHOLOGY HEALTH & MEDICINE. 2011; 16: 493-527.  
29  
30  
31 12 33. Wang P, Lin H, Yen C, Yeh Y, Hsu C, Chung K, et al. Comparison of outcomes after 3-month  
32  
33 13 methadone maintenance treatment between heroin users with and without HIV infection: a 3-month  
34  
35 14 follow-up study. Harm Reduction Journal. 2015; 12.  
36  
37  
38 15 34. Liu H, Li J, Lu Z, Liu W, Zhang Z. Does Chinese culture influence psychosocial factors for heroin  
39  
40 16 use among young adolescents in China? A cross-sectional study. BMC Public Health. 2010; 10:  
41  
42 17 563.  
43  
44  
45 18 35. Xu H, Gu J, Lau JTF, Zhong Y, Fan L, Zhao Y, et al. Misconceptions toward methadone  
46  
47 19 maintenance treatment (MMT) and associated factors among new MMT users in Guangzhou,  
48  
49 20 China. Addictive Behaviors. 2012; 37: 657-662.  
50  
51  
52 21 36. Lin C, Wu Z, Detels R. Family support, quality of life and concurrent substance use among  
53  
54 22 methadone maintenance therapy clients in China. Public Health. 2011; 125: 269-274.  
55  
56  
57  
58  
59  
60

- 1  
2  
3  
4 1 37. Bao Y, Liu Z, Epstein DH, Du C, Shi J, Lu L. A Meta-Analysis of Retention in Methadone  
5  
6 2 Maintenance by Dose and Dosing Strategy. *The American Journal of Drug and Alcohol Abuse*.  
7  
8 3 2009; 35: 28-33.  
9  
10  
11 4 38. AMATO L, DAVOLI M, APERUCCI C, FERRI M, FAGGIANO F, PMATTICK R. An overview  
12  
13 5 of systematic reviews of the effectiveness of opiate maintenance therapies: available evidence to  
14  
15 6 inform clinical practice and research. *Journal of Substance Abuse Treatment*. 2005; 28: 321-329.  
16  
17  
18 7 39. Conference NC. Effective medical treatment of opiate addiction. National Consensus Development  
19  
20 8 Panel on Effective Medical Treatment of Opiate Addiction. *JAMA*. 1998; 280: 1936-43.  
21  
22  
23 9 40. Liu E, Rou K, McGoogan JM, Pang L, Cao X, Wang C, et al. Factors Associated With Mortality of  
24  
25 10 HIV-Positive Clients Receiving Methadone Maintenance Treatment in China. *Journal of Infectious*  
26  
27 11 *Diseases*. 2013; 208: 442-453.  
28  
29  
30  
31 12 41. Dole VP, Nyswander ME, Kreek MJ. Narcotic blockade. 1966. *J Psychoactive Drugs*. 1991; 23:  
32  
33 13 following 232.  
34  
35  
36 14 42. Cooper JR. Ineffective use of psychoactive drugs. Methadone treatment is no exception. *Jama the*  
37  
38 15 *Journal of the American Medical Association*. 1992; 267: 281-2.  
39  
40  
41 16 43. Mattick RP, Breen C, Kimber J, Davoli M. Methadone maintenance therapy versus no opioid  
42  
43 17 replacement therapy for opioid dependence. *Cochrane Database Syst Rev*. 2009CD002209.  
44  
45  
46 18 44. Che Y, Assanangkornchai S, McNeil E, Li J, You J, Chongsuvivatwong V. Patterns of attendance  
47  
48 19 in methadone maintenance treatment program in Yunnan Province, China. *The American Journal*  
49  
50 20 *of Drug and Alcohol Abuse*. 2011; 37: 148-154.  
51  
52  
53 21 45. Gu J, Xu H, Lau JTF, Hao Y, Zhong Y, Fan L, et al. Misconceptions predict dropout and poor  
54  
55 22 adherence prospectively among newly admitted first-time methadone maintenance treatment clients  
56  
57  
58  
59  
60

1  
2  
3  
4  
5  
6  
7  
8  
9  
10  
11  
12  
13  
14  
15  
16  
17  
18  
19  
20  
21  
22  
23  
24  
25  
26  
27  
28  
29  
30  
31  
32  
33  
34  
35  
36  
37  
38  
39  
40  
41  
42  
43  
44  
45  
46  
47  
48  
49  
50  
51  
52  
53  
54  
55  
56  
57  
58  
59  
60

1           in Guangzhou, China. *Addiction*. 2012; 107: 1641-1649.

2   **46.** Lin C, Hung C, Peng C, Chao E, Lee TS. Factors Associated with Methadone Treatment Duration:

3           A Cox Regression Analysis. *PLOS ONE*. 2015; 10: e0123687.

4

For peer review only

1  
2  
3  
4  
5  
6  
7  
8  
9  
10  
11  
12  
13  
14  
15  
16  
17  
18  
19  
20  
21  
22  
23  
24  
25  
26  
27  
28  
29  
30  
31  
32  
33  
34  
35  
36  
37  
38  
39  
40  
41  
42  
43  
44  
45  
46  
47  
48  
49  
50  
51  
52  
53  
54  
55  
56  
57  
58  
59  
60

## Tables

Table 1. Characteristics of the participants (n=642)

| Characteristics                      | Urine Morphine(-)     | Urine Morphine(+)     | Total                 |
|--------------------------------------|-----------------------|-----------------------|-----------------------|
|                                      | (n=10)                | (n=632)               | (N=642)               |
|                                      | No. (% <sup>a</sup> ) | No. (% <sup>a</sup> ) | No. (% <sup>b</sup> ) |
| Age at Baseline (years)              |                       |                       |                       |
| ≤30                                  | 2(1.7)                | 113(98.3)             | 115(17.9)             |
| 31-                                  | 5(2.6)                | 186(97.4)             | 191(29.8)             |
| 36-                                  | 1(0.5)                | 197(99.5)             | 198(30.8)             |
| ≥41                                  | 2(1.5)                | 136(98.5)             | 138(21.5)             |
| Gender                               |                       |                       |                       |
| Male                                 | 10(1.7)               | 590(98.3)             | 600(93.5)             |
| Female                               | 0(0)                  | 42(100.0)             | 42(6.5)               |
| Ethnic                               |                       |                       |                       |
| Han                                  | 10(1.6)               | 626(98.4)             | 636(99.1)             |
| Others                               | 0(0)                  | 6(100.0)              | 6(0.9)                |
| Marital Status at Baseline           |                       |                       |                       |
| Never married                        | 4(1.2)                | 339(98.8)             | 343(53.4)             |
| Married currently                    | 5(2.2)                | 222(97.8)             | 227(35.4)             |
| Others                               | 1(1.4)                | 71(98.6)              | 72(11.2)              |
| Education Level                      |                       |                       |                       |
| Elementary or lower                  | 1(0.6)                | 164(99.4)             | 165(25.7)             |
| Juniorhigh school                    | 9(2.2)                | 400(97.8)             | 409(63.7)             |
| Senior high school or higher         | 0(0)                  | 68(100.0)             | 68(10.6)              |
| Employed Status at Baseline          |                       |                       |                       |
| Unemployed                           | 2(0.5)                | 408(99.5)             | 410(63.9)             |
| Employed                             | 8(3.4)                | 224(96.6)             | 232(36.1)             |
| Family Relationship at Baseline      |                       |                       |                       |
| Harmonious                           | 3(2.0)                | 149(98.0)             | 152(23.7)             |
| Inharmonious                         | 7(1.4)                | 483(98.6)             | 490(76.3)             |
| Mainly Financial Sources at Baseline |                       |                       |                       |
| Family or friends                    | 6(1.5)                | 390(98.5)             | 396(61.7)             |
| Others                               | 4(1.6)                | 242(98.4)             | 246(38.3)             |
| Duration of Drug Abuse (years)       |                       |                       |                       |
| ≤10                                  | 3(2.2)                | 136(97.8)             | 139(21.7)             |
| 11-15                                | 3(1.1)                | 263 (98.9)            | 266(41.4)             |
| ≥16                                  | 4(1.7)                | 233(98.3)             | 237(36.9)             |
| Type of Drug Use at Baseline         |                       |                       |                       |
| Heroin                               | 9(1.4)                | 618(98.6)             | 627(97.7)             |
| Others                               | 1(6.7)                | 14(93.3)              | 15(2.3)               |
| Intravenous Drug Use at Baseline     |                       |                       |                       |
| Yes                                  | 10(1.6)               | 623(98.4)             | 633(98.6)             |
| No                                   | 0(0)                  | 9(100.0)              | 9(1.4)                |

|                                                  |        |            |           |
|--------------------------------------------------|--------|------------|-----------|
| Shared Needles to Inject Drugs at Baseline       |        |            |           |
| Yes                                              | 4(1.1) | 364(98.9)  | 368(58.1) |
| No                                               | 6(2.2) | 259(97.8)  | 265(41.9) |
| Average Times of Drug Use per Day at Baseline    |        |            |           |
| ≤2                                               | 3(1.3) | 226(98.7)  | 229(35.7) |
| ≥3                                               | 7(1.7) | 406(98.3)  | 413(64.3) |
| Frequency of Meeting with Peer Users at Baseline |        |            |           |
| none                                             | 0(0)   | 80(100.0)  | 80(12.5)  |
| 1-4/month                                        | 2(1.2) | 160(98.8)  | 162(25.2) |
| 1-6/week                                         | 3(1.8) | 161(98.2)  | 164(25.5) |
| > 1/day                                          | 5(2.1) | 231(97.9)  | 236(36.8) |
| Multiple Sex Partners at Baseline                |        |            |           |
| Yes                                              | 2(1.8) | 110(98.2)  | 111(17.4) |
| No                                               | 8(1.5) | 522(98.5)  | 530(82.6) |
| Average Maintenance Doses (ml/day)               |        |            |           |
| ≥60                                              | 7(2.8) | 245(97.2)  | 252(39.3) |
| <60                                              | 3(0.8) | 387(99.2)  | 390(60.7) |
| Percentages of MMT Attendance (%)                |        |            |           |
| <20                                              | 2(1.6) | 127(98.4)  | 129(20.1) |
| 20-                                              | 0(0)   | 140(100.0) | 140(21.8) |
| 50-                                              | 1(0.7) | 139(99.3)  | 140(21.8) |
| ≥80%                                             | 7(3.0) | 226(97.0)  | 233(36.3) |

<sup>a</sup> calculated by row, <sup>b</sup> calculated by column.

1  
2  
3  
4  
5  
6  
7  
8  
9  
10  
11  
12  
13  
14  
15  
16  
17  
18  
19  
20  
21  
22  
23  
24  
25  
26  
27  
28  
29  
30  
31  
32  
33  
34  
35  
36  
37  
38  
39  
40  
41  
42  
43  
44  
45  
46  
47  
48  
49  
1 Table 2 Urine morphine tests results at the different entrant year and followed month (n=642)

| Year | Positive percentage of urine morphine tests by month (%; n/N) |              |              |              |              |              |             |             |             |             |             |             | Median (IQR)     |
|------|---------------------------------------------------------------|--------------|--------------|--------------|--------------|--------------|-------------|-------------|-------------|-------------|-------------|-------------|------------------|
|      | 1                                                             | 2            | 3            | 4            | 5            | 6            | 7           | 8           | 9           | 10          | 11          | 12          |                  |
| 2006 | 88.3(53/60)                                                   | 56.1(32/57)  | 47.3(26/55)  | 43.1(22/51)  | 53.3(24/45)  | 51.2(21/41)  | 56.4(22/39) | 47.2(17/36) | 54.3(19/35) | 60.0(21/35) | 37.5(12/32) | 46.9(15/32) | 52.3(47.0-56.3)  |
| 2007 | 90.8(118/130)                                                 | 56.3(71/126) | 53.4(63/118) | 45.1(51/113) | 48.1(52/108) | 53.5(54/101) | 49.5(48/97) | 43.0(37/86) | 47.6(39/82) | 46.2(36/78) | 44.4(32/72) | 44.3(31/70) | 47.9(44.6-53.5)  |
| 2008 | 93.9(124/132)                                                 | 52.3(56/107) | 49.5(47/95)  | 51.2(43/84)  | 53.9(41/76)  | 44.9(31/69)  | 40.9(27/66) | 38.5(25/65) | 41.0(25/61) | 39.7(23/58) | 39.7(23/58) | 49.1(28/57) | 47.0(40.0-52.0)  |
| 2009 | 98.8(83/84)                                                   | 68.0(51/75)  | 46.8(29/62)  | 43.9(25/57)  | 56.4(31/55)  | 46.2(24/52)  | 47.1(24/51) | 33.3(16/48) | 42.6(20/47) | 37.2(16/43) | 40.5(17/42) | 31.7(13/41) | 45.1(40.1-49.2)  |
| 2010 | 96.1(49/51)                                                   | 50.0(22/44)  | 52.5(21/40)  | 46.2(18/39)  | 40.5(15/37)  | 42.9(15/35)  | 43.8(14/32) | 45.2(14/31) | 46.6(14/30) | 40.0(12/30) | 35.7(10/28) | 37.0(10/27) | 44.5(40.1-49.2)  |
| 2011 | 96.7(87/90)                                                   | 57.0(45/79)  | 50.0(36/72)  | 44.1(30/68)  | 42.9(27/63)  | 46.6(27/58)  | 63.0(34/54) | 55.3(26/47) | 47.6(20/42) | 42.1(16/38) | 36.4(12/33) | 41.9(13/31) | 47.1(42.3-56.6)  |
| 2012 | 91.7(55/60)                                                   | 40.4(19/47)  | 33.3(14/42)  | 21.6(8/37)   | 33.3(11/33)  | 32.0(8/25)   | 16.7(3/18)  | 20.0(3/15)  | 8.3(1/12)   | 18.2(2/11)  | 20.0(2/10)  | 25.0(2/8)   | 23.3(18.7-33.3)  |
| 2013 | 100.0(35/35)                                                  | 55.4(10/18)  | 28.6(4/14)   | 25.0(2/8)    | 75.0(3/4)    | 33.3(1/3)    | 50.0(1/2)   | 100.0(1/1)  | 100.0(1/1)  | -           | -           | -           | 55.4(31.0-100.0) |



1  
2  
3  
4  
5  
6  
7  
8  
9  
10  
11  
12  
13  
14  
15  
16  
17  
18  
19  
20  
21  
22  
23  
24  
25  
26  
27  
28  
29  
30  
31  
32  
33  
34  
35  
36  
37  
38  
39  
40  
41  
42  
43  
44  
45  
46  
47  
48  
49  
50  
51  
52  
53  
54  
55  
56  
57  
58  
59  
60

1 **Table 3** The distribution of positive percentages of urine morphine tests among the urine morphine  
2 (+) participants during the study period (n =632)

| Positive percentage (%) | Number (n) | Percentage (%) |
|-------------------------|------------|----------------|
| >0                      | 22         | 3.5            |
| 10-                     | 47         | 7.4            |
| 20-                     | 59         | 9.3            |
| 30-                     | 55         | 8.7            |
| 40-                     | 31         | 4.9            |
| 50-                     | 85         | 13.4           |
| 60-                     | 56         | 8.9            |
| 70-                     | 34         | 5.4            |
| 80-                     | 32         | 5.1            |
| 90-                     | 211        | 33.4           |
| total                   | 632        | 100.0          |

3  
4

For peer review only

1 Table4. Correlates of higher positive percentages among urine morphine (+) participants during  
 2 the study period (n=632)

| Characteristics                   | <40%<br>(n=183)      | 40%-80%<br>(n=206)   | >80%<br>(n=243)      | OR(95%CI) <sup>a, b</sup> | <i>p</i> <sup>b</sup> |
|-----------------------------------|----------------------|----------------------|----------------------|---------------------------|-----------------------|
|                                   | No. (%) <sup>*</sup> | No. (%) <sup>*</sup> | No. (%) <sup>*</sup> |                           |                       |
| Age (years)                       |                      |                      |                      |                           |                       |
| ≤30                               | 36(31.9)             | 47(41.6)             | 30(26.5)             | 0.45(0.26-0.80)           | <b>0.006</b>          |
| 31-                               | 55(29.6)             | 56(30.1)             | 75(40.3)             | 0.63(0.39-1.00)           | <b>0.051</b>          |
| 36-                               | 55(27.9)             | 68(34.5)             | 74(37.6)             | 0.65(0.42-1.01)           | <b>0.054</b>          |
| ≥41                               | 37(27.2)             | 35(25.7)             | 64(47.1)             | 1.00                      |                       |
| Gender                            |                      |                      |                      |                           |                       |
| Male                              | 168(28.5)            | 197(33.4)            | 225(38.1)            | 0.94(0.50-1.75)           | 0.844                 |
| Female                            | 15(35.7)             | 9(21.4)              | 18(42.9)             | 1.00                      |                       |
| Ethnic                            |                      |                      |                      |                           |                       |
| Han                               | 181(28.9)            | 206(32.9)            | 239(38.2)            | 0.24(0.05-1.26)           | 0.092                 |
| Others                            | 2(33.3)              | 0(0)                 | 4(66.7)              | 1.00                      |                       |
| Marital Status                    |                      |                      |                      |                           |                       |
| Never married                     | 97(28.6)             | 117(34.5)            | 125(36.9)            | 1.52(0.91-2.55)           | 0.111                 |
| Married Currently                 | 58(26.1)             | 71(32.0)             | 93(41.9)             | 1.47(0.88-2.48)           | 0.144                 |
| Others                            | 28(39.4)             | 18(25.4)             | 25(35.2)             | 1.00                      |                       |
| Education Level                   |                      |                      |                      |                           |                       |
| Elementary or lower               | 44(26.8)             | 54(32.9)             | 66(40.2)             | 1.03(0.60-1.79)           | 0.905                 |
| Juniorhigh school                 | 117(29.3)            | 131(32.8)            | 152(38.0)            | 1.11(0.67-1.82)           | 0.686                 |
| Senior high school or higher      | 22(32.4)             | 21(30.9)             | 25(36.8)             | 1.00                      |                       |
| Employment Status at Baseline     |                      |                      |                      |                           |                       |
| Unemployed                        | 122(29.9)            | 136(33.3)            | 150(36.8)            | 0.90(0.64-1.27)           | 0.563                 |
| Employed                          | 61(27.2)             | 70(31.3)             | 93(41.5)             | 1.00                      |                       |
| Family Relationship at Baseline   |                      |                      |                      |                           |                       |
| Harmonious                        | 37(24.8)             | 48(32.2)             | 64(43.0)             | 1.46(1.01-2.12)           | <b>0.046</b>          |
| Inharmonious                      | 146(30.2)            | 158(32.7)            | 179(37.1)            | 1.00                      |                       |
| Mainly Financial Sources          |                      |                      |                      |                           |                       |
| Family or friends                 | 121(31.0)            | 132(33.8)            | 137(35.1)            | 0.71(0.51-0.98)           | <b>0.038</b>          |
| Others                            | 62(25.6)             | 74(30.6)             | 106(43.8)            | 1.00                      |                       |
| Duration of Drug Abuse (years)    |                      |                      |                      |                           |                       |
| ≤10                               | 35(25.7)             | 53(39.0)             | 48(35.3)             | 0.91(0.58-1.42)           | 0.665                 |
| 11-15                             | 81(30.8)             | 84(31.9)             | 98(37.3)             | 0.96(0.67-1.38)           | 0.845                 |
| ≥16                               | 67(28.8)             | 69(29.6)             | 97(41.6)             | 1.00                      |                       |
| Average Times of Drug Use per Day |                      |                      |                      |                           |                       |
| ≤2                                | 53(23.5)             | 92(40.7)             | 81(35.8)             | 0.86(0.62-1.19)           | 0.364                 |
| ≥3                                | 130(32.0)            | 114(28.1)            | 162(39.9)            | 1.00                      |                       |
| Shared Needles at Baseline        |                      |                      |                      |                           |                       |
| Yes                               | 102(27.9)            | 126(34.5)            | 137(37.5)            | 1.14(0.83-1.55)           | 0.415                 |
| No                                | 81(30.3)             | 80(30.0)             | 106(39.7)            | 1.00                      |                       |
| Frequency of Meeting with Peer    |                      |                      |                      |                           |                       |

|                                    |           |           |           |                 |        |  |
|------------------------------------|-----------|-----------|-----------|-----------------|--------|--|
| Users at Baseline                  |           |           |           |                 |        |  |
| none                               | 25(31.3)  | 28(35.0)  | 27(33.8)  | 0.89(0.54-1.47) | 0.645  |  |
| 1-4/month                          | 44(27.5)  | 55(34.4)  | 61(38.1)  | 1.11(0.75-1.64) | 0.595  |  |
| 1-6/week                           | 46(28.6)  | 54(33.5)  | 61(37.9)  | 1.13(0.76-1.67) | 0.547  |  |
| > 1/day                            | 68(29.4)  | 69(29.9)  | 94(40.7)  | 1.00            |        |  |
| Multiple Sex Partners at Baseline  |           |           |           |                 |        |  |
| Yes                                | 26(23.6)  | 37(33.6)  | 47(42.7)  | 1.35(0.90-2.03) | 0.148  |  |
| No                                 | 157(30.1) | 169(32.4) | 196(37.5) | 1.00            |        |  |
| Average Maintenance Doses (ml/day) |           |           |           |                 |        |  |
| ≥60                                | 94(38.4)  | 84(34.3)  | 67(27.3)  | 0.49(0.36-0.68) | <0.001 |  |
| <60                                | 89(23.0)  | 122(31.5) | 176(45.5) | 1.00            |        |  |
| Percentages of MMT Attendance (%)  |           |           |           |                 |        |  |
| <20                                | 7(5.5)    | 44(34.6)  | 76(59.8)  | 4.74(3.01-7.47) | <0.001 |  |
| 20-                                | 34(24.3)  | 53(37.9)  | 53(37.9)  | 1.74(1.16-2.64) | 0.008  |  |
| 50-                                | 52(37.4)  | 42(30.2)  | 45(32.4)  | 1.24(0.83-1.84) | 0.294  |  |
| ≥80%                               | 90(39.8)  | 67(29.6)  | 69(30.5)  | 1.00            |        |  |

1 <sup>a</sup>OR: Odds Ratio, CI: Confidence Interval;

2 <sup>b</sup>Obtained from multivariate ordinal logistic regression analysis adjusting for potential confounding variables listed  
3 in the table;

4 \*Proportions were calculated in the row.

5

1 Table5. Self-reported risk behaviors among urine morphine (+) participants during the study  
 2 period (n=440)

| Characteristics               | <40%     | 40%-80%   | >80%      | Total     |
|-------------------------------|----------|-----------|-----------|-----------|
|                               | No. (%)  | No. (%)   | No. (%)   | No. (%)   |
| Drug Use (n=440)              |          |           |           |           |
| Yes                           | 61(39.4) | 111(68.1) | 107(87.7) | 279(63.4) |
| No                            | 94(60.6) | 52(31.9)  | 15(12.3)  | 161(36.6) |
| Injected Drugs (n=279)        |          |           |           |           |
| Yes                           | 48(78.7) | 96(86.5)  | 102(95.3) | 246(88.2) |
| No                            | 13(21.3) | 15(13.5)  | 5(4.7)    | 33(11.8)  |
| Shared Needles (n=246)        |          |           |           |           |
| Yes                           | 7(14.6)  | 21(21.9)  | 23(22.5)  | 51(20.7)  |
| No                            | 41(85.4) | 75(78.1)  | 79(77.5)  | 195(79.3) |
| Sex Activity (n=440)          |          |           |           |           |
| Yes                           | 76(49.0) | 99(60.7)  | 76(62.3)  | 251(57.0) |
| No                            | 79(51.0) | 64(39.3)  | 46(37.3)  | 189(43.0) |
| Multiple Sex Partners (n=251) |          |           |           |           |
| Yes                           | 21(27.9) | 37(37.4)  | 14(18.4)  | 72(28.7)  |
| No                            | 55(72.4) | 62(62.6)  | 62(81.6)  | 179(71.3) |
| Condom Use (n=251)            |          |           |           |           |
| Yes                           | 47(61.8) | 56(56.6)  | 47(61.8)  | 150(59.8) |
| No                            | 29(38.2) | 43(43.4)  | 29(38.2)  | 101(40.2) |
| Sex for Drugs (n=180)         |          |           |           |           |
| Yes                           | 7(17.5)  | 14(19.4)  | 3(4.4)    | 24(13.3)  |
| No                            | 33(82.5) | 58(80.6)  | 65(95.6)  | 156(86.7) |

3

4

1  
2  
3  
4  
5  
6  
7  
8  
9  
10  
11  
12  
13  
14  
15  
16  
17  
18  
19  
20  
21  
22  
23  
24  
25  
26  
27  
28  
29  
30  
31  
32  
33  
34  
35  
36  
37  
38  
39  
40  
41  
42  
43  
44  
45  
46  
47  
48  
49  
50  
51  
52  
53  
54  
55  
56  
57  
58  
59  
60

1

For peer review only

## STROBE Statement—checklist of items that should be included in reports of observational studies

|                              | Item No | Recommendation                                                                                                                                                                                                                                                                                                                                                                                                                                                                                                                                                                                                                                                                                                                                                   |
|------------------------------|---------|------------------------------------------------------------------------------------------------------------------------------------------------------------------------------------------------------------------------------------------------------------------------------------------------------------------------------------------------------------------------------------------------------------------------------------------------------------------------------------------------------------------------------------------------------------------------------------------------------------------------------------------------------------------------------------------------------------------------------------------------------------------|
| <b>Title and abstract</b>    | 1       | (a) Indicate the study's design with a commonly used term in the title or the abstract<br><a href="#">In the title</a><br>(b) Provide in the abstract an informative and balanced summary of what was done and what was found<br><a href="#">Line 7-8,page 2; line 9-16,page 2</a>                                                                                                                                                                                                                                                                                                                                                                                                                                                                               |
| <b>Introduction</b>          |         |                                                                                                                                                                                                                                                                                                                                                                                                                                                                                                                                                                                                                                                                                                                                                                  |
| Background/rationale         | 2       | Explain the scientific background and rationale for the investigation being reported<br><a href="#">Line 19-22, page 4; line 1-4, page 5</a>                                                                                                                                                                                                                                                                                                                                                                                                                                                                                                                                                                                                                     |
| Objectives                   | 3       | State specific objectives, including any prespecified hypotheses<br><a href="#">Line 5-8, page 5</a>                                                                                                                                                                                                                                                                                                                                                                                                                                                                                                                                                                                                                                                             |
| <b>Methods</b>               |         |                                                                                                                                                                                                                                                                                                                                                                                                                                                                                                                                                                                                                                                                                                                                                                  |
| Study design                 | 4       | Present key elements of study design early in the paper<br><a href="#">Line 11-15,page 6</a>                                                                                                                                                                                                                                                                                                                                                                                                                                                                                                                                                                                                                                                                     |
| Setting                      | 5       | Describe the setting, locations, and relevant dates, including periods of recruitment, exposure, follow-up, and data collection<br><a href="#">Line 11-21,page 6</a>                                                                                                                                                                                                                                                                                                                                                                                                                                                                                                                                                                                             |
| Participants                 | 6       | (a) <i>Cohort study</i> —Give the eligibility criteria, and the sources and methods of selection of participants. Describe methods of follow-up<br><a href="#">Line 18-21, page 6; line 1-3,page 7</a><br><i>Case-control study</i> —Give the eligibility criteria, and the sources and methods of case ascertainment and control selection. Give the rationale for the choice of cases and controls<br><i>Cross-sectional study</i> —Give the eligibility criteria, and the sources and methods of selection of participants<br>(b) <i>Cohort study</i> —For matched studies, give matching criteria and number of exposed and unexposed<br>-----<br><i>Case-control study</i> —For matched studies, give matching criteria and the number of controls per case |
| Variables                    | 7       | Clearly define all outcomes, exposures, predictors, potential confounders, and effect modifiers. Give diagnostic criteria, if applicable<br><a href="#">line 4-22,page 7;line 1-15, page 8</a>                                                                                                                                                                                                                                                                                                                                                                                                                                                                                                                                                                   |
| Data sources/<br>measurement | 8*      | For each variable of interest, give sources of data and details of methods of assessment (measurement). Describe comparability of assessment methods if there is more than one group<br><a href="#">line 4-22,page 7;line 1-15, page 8</a>                                                                                                                                                                                                                                                                                                                                                                                                                                                                                                                       |
| Bias                         | 9       | Describe any efforts to address potential sources of bias<br><a href="#">Line 14-17,page 7; line 1-2,page 8</a>                                                                                                                                                                                                                                                                                                                                                                                                                                                                                                                                                                                                                                                  |
| Study size                   | 10      | Explain how the study size was arrived at<br><a href="#">Line 15-17, page 6</a>                                                                                                                                                                                                                                                                                                                                                                                                                                                                                                                                                                                                                                                                                  |
| Quantitative variables       | 11      | Explain how quantitative variables were handled in the analyses. If applicable, describe which groupings were chosen and why<br><a href="#">Line 19-21,page 7; line 1-6,page 8</a>                                                                                                                                                                                                                                                                                                                                                                                                                                                                                                                                                                               |

|    |                     |                                                                                            |
|----|---------------------|--------------------------------------------------------------------------------------------|
| 1  |                     |                                                                                            |
| 2  |                     |                                                                                            |
| 3  | Statistical methods | 12                                                                                         |
| 4  |                     | (a) Describe all statistical methods, including those used to control for confounding      |
| 5  |                     | <a href="#">Line 16-22, page 8</a>                                                         |
| 6  |                     | (b) Describe any methods used to examine subgroups and interactions                        |
| 7  |                     | (c) Explain how missing data were addressed                                                |
| 8  |                     | (d) <i>Cohort study</i> —If applicable, explain how loss to follow-up was addressed        |
| 9  |                     | <i>Case-control study</i> —If applicable, explain how matching of cases and controls was   |
| 10 |                     | addressed                                                                                  |
| 11 |                     | <i>Cross-sectional study</i> —If applicable, describe analytical methods taking account of |
| 12 |                     | sampling strategy                                                                          |
| 13 |                     | (e) Describe any sensitivity analyses                                                      |
| 14 |                     |                                                                                            |

Continued on next page

For peer review only

**Results**

|                  |     |                                                                                                                                                                                                                                                     |
|------------------|-----|-----------------------------------------------------------------------------------------------------------------------------------------------------------------------------------------------------------------------------------------------------|
| Participants     | 13* | (a) Report numbers of individuals at each stage of study—eg numbers potentially eligible, examined for eligibility, confirmed eligible, included in the study, completing follow-up, and analysed<br><a href="#">Line 15-17, page 6</a>             |
|                  |     | (b) Give reasons for non-participation at each stage                                                                                                                                                                                                |
|                  |     | (c) Consider use of a flow diagram                                                                                                                                                                                                                  |
| Descriptive data | 14* | (a) Give characteristics of study participants (eg demographic, clinical, social) and information on exposures and potential confounders<br><a href="#">Table 1, line 2-12, page 9</a>                                                              |
|                  |     | (b) Indicate number of participants with missing data for each variable of interest<br><a href="#">Table 1-5</a>                                                                                                                                    |
|                  |     | (c) <i>Cohort study</i> —Summarise follow-up time (eg, average and total amount)<br><a href="#">Line 22, page 6; Line 1-3, page 7</a>                                                                                                               |
| Outcome data     | 15* | <i>Cohort study</i> —Report numbers of outcome events or summary measures over time<br><a href="#">line 21-22, page 9</a>                                                                                                                           |
|                  |     | <i>Case-control study</i> —Report numbers in each exposure category, or summary measures of exposure                                                                                                                                                |
|                  |     | <i>Cross-sectional study</i> —Report numbers of outcome events or summary measures                                                                                                                                                                  |
| Main results     | 16  | (a) Give unadjusted estimates and, if applicable, confounder-adjusted estimates and their precision (eg, 95% confidence interval). Make clear which confounders were adjusted for and why they were included<br><a href="#">Table 4, page 26-27</a> |
|                  |     | (b) Report category boundaries when continuous variables were categorized<br><a href="#">Table 1, page 22-23</a>                                                                                                                                    |
|                  |     | (c) If relevant, consider translating estimates of relative risk into absolute risk for a meaningful time period                                                                                                                                    |
| Other analyses   | 17  | Report other analyses done—eg analyses of subgroups and interactions, and sensitivity analyses<br><a href="#">Line 10-15, page 10</a>                                                                                                               |

**Discussion**

|                  |    |                                                                                                                                                                                                                                                                                                 |
|------------------|----|-------------------------------------------------------------------------------------------------------------------------------------------------------------------------------------------------------------------------------------------------------------------------------------------------|
| Key results      | 18 | Summarise key results with reference to study objectives<br><a href="#">Line 7-8, page 11; line 12, page 11; line 1-2, page 12; line 6-7, page 12; line 16-18, page 12; line 22, page 12</a>                                                                                                    |
| Limitations      | 19 | Discuss limitations of the study, taking into account sources of potential bias or imprecision. Discuss both direction and magnitude of any potential bias<br><a href="#">Line 17-22, page 13; line 1-5, page 14</a>                                                                            |
| Interpretation   | 20 | Give a cautious overall interpretation of results considering objectives, limitations, multiplicity of analyses, results from similar studies, and other relevant evidence<br><a href="#">Line 9-11, page 11; line 13-19, page 11; line 2-4, page 12; line 6-10, page 12; line 1-6, page 13</a> |
| Generalisability | 21 | Discuss the generalisability (external validity) of the study results<br><a href="#">Line 6-12, page 14</a>                                                                                                                                                                                     |

**Other information**

|         |    |                                                                                                                                                                                                    |
|---------|----|----------------------------------------------------------------------------------------------------------------------------------------------------------------------------------------------------|
| Funding | 22 | Give the source of funding and the role of the funders for the present study and, if applicable, for the original study on which the present article is based<br><a href="#">Line 1-5, page 15</a> |
|---------|----|----------------------------------------------------------------------------------------------------------------------------------------------------------------------------------------------------|



1  
2  
3 \*Give information separately for cases and controls in case-control studies and, if applicable, for exposed and  
4 unexposed groups in cohort and cross-sectional studies.  
5  
6

7 **Note:** An Explanation and Elaboration article discusses each checklist item and gives methodological background and  
8 published examples of transparent reporting. The STROBE checklist is best used in conjunction with this article (freely  
9 available on the Web sites of PLoS Medicine at <http://www.plosmedicine.org/>, Annals of Internal Medicine at  
10 <http://www.annals.org/>, and Epidemiology at <http://www.epidem.com/>). Information on the STROBE Initiative is  
11 available at [www.strobe-statement.org](http://www.strobe-statement.org).  
12  
13  
14  
15  
16  
17  
18  
19  
20  
21  
22  
23  
24  
25  
26  
27  
28  
29  
30  
31  
32  
33  
34  
35  
36  
37  
38  
39  
40  
41  
42  
43  
44  
45  
46  
47  
48  
49  
50  
51  
52  
53  
54  
55  
56  
57  
58  
59  
60

For peer review only

# BMJ Open

## Positive Percentages of Urine Morphine Tests among Methadone Maintenance Treatment Clients with HIV/AIDS: A 12-Month Follow-up Study in Guangdong Province, China

|                                 |                                                                                                                                                                                                                                                                                                                                                                                                                                                                                                                                                                                                                                                                                                                                                                                                                                                                                       |
|---------------------------------|---------------------------------------------------------------------------------------------------------------------------------------------------------------------------------------------------------------------------------------------------------------------------------------------------------------------------------------------------------------------------------------------------------------------------------------------------------------------------------------------------------------------------------------------------------------------------------------------------------------------------------------------------------------------------------------------------------------------------------------------------------------------------------------------------------------------------------------------------------------------------------------|
| Journal:                        | <i>BMJ Open</i>                                                                                                                                                                                                                                                                                                                                                                                                                                                                                                                                                                                                                                                                                                                                                                                                                                                                       |
| Manuscript ID                   | bmjopen-2016-014237.R2                                                                                                                                                                                                                                                                                                                                                                                                                                                                                                                                                                                                                                                                                                                                                                                                                                                                |
| Article Type:                   | Research                                                                                                                                                                                                                                                                                                                                                                                                                                                                                                                                                                                                                                                                                                                                                                                                                                                                              |
| Date Submitted by the Author:   | 13-Feb-2017                                                                                                                                                                                                                                                                                                                                                                                                                                                                                                                                                                                                                                                                                                                                                                                                                                                                           |
| Complete List of Authors:       | Luo, Xiaofeng; Sun Yat-Sen University, Faculty of Medical Statistics and Epidemiology, School of Public Health;Sun Yat-sen Center for Migrant Health Policy<br>Gong, Xiao; Sun Yat-Sen University, Faculty of Medical Statistics and Epidemiology, School of Public Health;Sun Yat-sen Center for Migrant Health Policy<br>Zhao, Peizhen; Guangdong Provincial Center for Skin Disease and STI Control<br>Zou, Xia; Sun Yat-Sen University, Faculty of Medical Statistics and Epidemiology, School of Public Health;Sun Yat-sen Center for Migrant Health Policy<br>Chen, Wen; Sun Yat-Sen University, Faculty of Medical Statistics and Epidemiology, School of Public Health;Sun Yat-sen Center for Migrant Health Policy<br>Ling, Li; Sun Yat-sen University, Faculty of Medical Statistics and Epidemiology, School of Public Health;Sun Yat-sen Center for Migrant Health Policy |
| <b>Primary Subject Heading</b>: | Addiction                                                                                                                                                                                                                                                                                                                                                                                                                                                                                                                                                                                                                                                                                                                                                                                                                                                                             |
| Secondary Subject Heading:      | Epidemiology, HIV/AIDS                                                                                                                                                                                                                                                                                                                                                                                                                                                                                                                                                                                                                                                                                                                                                                                                                                                                |
| Keywords:                       | Heroin Use, Methadone Maintenance Treatment (MMT), HIV, China                                                                                                                                                                                                                                                                                                                                                                                                                                                                                                                                                                                                                                                                                                                                                                                                                         |
|                                 |                                                                                                                                                                                                                                                                                                                                                                                                                                                                                                                                                                                                                                                                                                                                                                                                                                                                                       |

SCHOLARONE™  
Manuscripts

1  
2  
3  
4 **1 Positive Percentages of Urine Morphine Tests among Methadone Maintenance Treatment Clients**  
5  
6 **2 with HIV/AIDS: A 12-Month Follow-up Study in Guangdong Province, China**  
7

8  
9 Xiaofeng Luo<sup>1,2</sup>, Xiao Gong<sup>1,2</sup>, Peizhen Zhao<sup>3</sup>, Xia Zou<sup>1,2</sup>, Wen Chen<sup>1,2</sup>, Li Ling<sup>1,2\*</sup>  
10

11 <sup>1</sup> Faculty of Medical Statistics and Epidemiology, School of Public Health, Sun Yat-sen University, 74  
12  
13 Zhongshan Road II, Guangzhou 510080, China.  
14

15  
16 <sup>2</sup> Sun Yat-sen Center for Migrant Health Policy, Sun Yat-sen University, 74 Zhongshan Road II,  
17  
18 Guangzhou 510080, China.  
19

20  
21 <sup>3</sup> Guangdong Provincial Center for Skin Disease and STI Control, No. 2 Lujing Road, Guangzhou  
22  
23 510095, China.  
24

25  
26  
27  
28  
29 **\*Correspondence:** Li Ling, PhD, Professor. Faculty of Medical Statistics and Epidemiology, School of  
30  
31 Public Health, Sun Yat-sen University, 74 Zhongshan Road II, Guangzhou 510080, China; Sun Yat-sen  
32  
33 Center for Migrant Health Policy, Sun Yat-sen University, 74 Zhongshan Road II, Guangzhou 510080,  
34  
35 China. Email: lingli@mail.sysu.edu.cn; Tel/Fax: +86-20-87333319.  
36  
37

38  
39 **Running head:** Heroin use among MMT clients with HIV/AIDS in Guangdong  
40

41  
42  
43  
44 **Word Count:** 2,833 for main text including sub-headings, 214 for abstract  
45  
46  
47  
48  
49  
50  
51  
52  
53  
54  
55  
56  
57  
58  
59  
60

1  
2  
3  
4 **Abstract**

5  
6 **Objective:** We aimed to assess the positive percentages of urine morphine tests and correlates among  
7  
8  
9  
10 methadone maintenance treatment (MMT) clients with HIV/AIDS in Guangdong, China.

11 **Setting:** Fourteen MMT clinics located in 9 cities of Guangdong were chosen as study sites.

12  
13 **Participants:** In this study, we reviewed 293 clients with opioid dependence, HIV seropositive, 18  
14  
15  
16  
17  
18  
19  
20  
21  
22  
23  
24  
25  
26  
27  
28  
29  
30  
31  
32  
33  
34  
35  
36  
37  
38  
39  
40  
41  
42  
43  
44  
45  
46  
47  
48  
49  
50  
51  
52  
53  
54  
55  
56  
57  
58  
59  
60  
years or older, providing informed consent and having at least 10 records of urine morphine tests  
during the study period.

6  
7  
8  
9  
10  
11  
12  
13  
14  
15  
16  
17  
18  
19  
20  
21  
22  
23  
24  
25  
26  
27  
28  
29  
30  
31  
32  
33  
34  
35  
36  
37  
38  
39  
40  
41  
42  
43  
44  
45  
46  
47  
48  
49  
50  
51  
52  
53  
54  
55  
56  
57  
58  
59  
60  
**Primary and secondary outcome measures:** The positive percentages of urine morphine tests were  
calculated and underlying predictors were estimated.

10  
11  
12  
13  
14  
15  
16  
17  
18  
19  
20  
21  
22  
23  
24  
25  
26  
27  
28  
29  
30  
31  
32  
33  
34  
35  
36  
37  
38  
39  
40  
41  
42  
43  
44  
45  
46  
47  
48  
49  
50  
51  
52  
53  
54  
55  
56  
57  
58  
59  
60  
**Results:** About 91.5% participants had used heroin at least once during the study period. Of them,  
positive percentages of urine morphine tests that <20%, 20%-60% and >80% were 25.4%, 36.1% and  
38.5% respectively. Lower percentages of continued heroin use were associated with being young  
(OR<sub>≤30</sub>=0.31, 95%CI: 0.12-0.78; OR<sub>31+</sub>=0.44, 95%CI: 0.20-1.00), and financial sources depending on  
family or friends (OR=0.55, 95%CI: 0.32-0.93). Higher percentages of continued heroin use were  
associated with being unemployed (OR=1.99, 95%CI: 1.13-3.49) and poorer MMT attendance  
(OR<sub><20%</sub>=3.60, 95%CI: 1.55-8.33; OR<sub>20%</sub>=2.80, 95%CI: 1.48-5.33).

17  
18  
19  
20  
21  
22  
23  
24  
25  
26  
27  
28  
29  
30  
31  
32  
33  
34  
35  
36  
37  
38  
39  
40  
41  
42  
43  
44  
45  
46  
47  
48  
49  
50  
51  
52  
53  
54  
55  
56  
57  
58  
59  
60  
**Conclusions:** High positive percentages of urine morphine tests remain prevalent among MMT clients  
with HIV/AIDS in Guangdong. The present findings have implications for taking effective measures to  
facilitate attendance in order to decrease heroin use and ultimately improve the effectiveness among  
these sub-group MMT clients.

21  
22  
23  
24  
25  
26  
27  
28  
29  
30  
31  
32  
33  
34  
35  
36  
37  
38  
39  
40  
41  
42  
43  
44  
45  
46  
47  
48  
49  
50  
51  
52  
53  
54  
55  
56  
57  
58  
59  
60  
**Key words:** Heroin Use; Methadone Maintenance Treatment (MMT); HIV; China

1  
2  
3  
4 **1 Strengths and Limitations**  
5

- 6 1. This is a long-term consecutive study specifically designed to examine concurrent heroin use  
7  
8  
9 2. This study mainly focused on positive percentages of urine morphine tests among HIV-positive  
10  
11  
12  
13  
14  
15  
16  
17  
18  
19  
20  
21  
22  
23  
24  
25  
26  
27  
28  
29  
30  
31  
32  
33  
34  
35  
36  
37  
38  
39  
40  
41  
42  
43  
44  
45  
46  
47  
48  
49  
50  
51  
52  
53  
54  
55  
56  
57  
58  
59  
60
1. This is a long-term consecutive study specifically designed to examine concurrent heroin use among HIV-positive MMT clients in China.
  2. This study mainly focused on positive percentages of urine morphine tests among HIV-positive MMT clients in China.
  3. Self-reported data are subject to recall bias or deliberate concealment.
  4. China is experiencing a significant increase in the use of new drugs, but this study did not consider it.
  5. We only examined the percentages of heroin use during the first 12 months after receiving MMT due to the limited sample size and high drop-out.

## 1 Introduction

2 In China, illicit drug use has increased dramatically since the 1980s [1]. There were cumulatively  
3 registered 2.95 million drug users by the end of 2014 and 480,000 newly registrations in 2014  
4 nationwide [2]. Although China recently is experiencing a significant increase in the use of new-type  
5 drugs, heroin still remains the major illicit used drug among drug users [2]. The earliest HIV case was  
6 identified among intravenous drug users (IDUs) in Southern Yunnan province in 1989 [3]. The early  
7 spread of HIV epidemics in China mainly attributed to intravenous drug use (IDU) [4]. As of 2013,  
8 437,000 people lived with HIV/AIDS in China (including 263,000 people living with HIV and 174,000  
9 AIDS patients), accounting for 0.033% of the total population in China; and sentinel surveillance data  
10 showed the HIV/AIDS prevalence was 6.3% among IDUs [5].

11 Globally, methadone maintenance treatment (MMT) is the most widely used pharmacological  
12 treatment for opioid dependence. China has operated MMT program as a national strategy to combat  
13 the joint threat of drug use and HIV/AIDS since 2004 [6]. For decades, MMT program has achieved its  
14 crucial effectiveness not only in reducing heroin use [7] but also in preventing the spread of HIV [8, 9].  
15 Meanwhile, studies have shown that MMT is beneficial in reducing drug-related criminal activities [10]  
16 and drug-related mortality [11]. In addition, for the HIV-positive individuals, MMT could facilitate the  
17 adherence to antiretroviral therapy [12]. By the end of April 2015, China has 767 MMT clinics in 28  
18 provinces across the nation, serving nearly 190,000 clients [13].

19 However, many clients did not completely abstain from heroin and exhibited continued heroin use  
20 while in MMT [14-17]. Continued heroin use could lead to negative MMT treatment outcomes among  
21 clients [18]. Heroin addicts still contribute a high mortality even with MMT [19]. Overdosed drug  
22 intake remains the most common cause of death among MMT clients [20]. After a period of abstinence

1 via MMT, the heroin tolerance of clients would decrease, thus overdosed intake may become more  
2 prevalent [21, 22]. Individuals with HIV/AIDS are a special group among MMT clients. A  
3 meta-analysis showed that HIV seropositivity would increase the mortality risk of overdose [23]. In  
4 addition, continued heroin use would decrease the retention rate among MMT clients with HIV/AIDS  
5 [24]. Therefore, heroin use deserves more attention among MMT clients with HIV/AIDS. To date,  
6 limited data are available on heroin use among MMT clients with HIV/AIDS in China [14, 25] and  
7 about the higher percentages of heroin use is even less. To fill this gap, we applied this study is to  
8 examine the higher percentages of heroin use among MMT clients with HIV/AIDS in Guangdong.

9

## 1 **Methods**

### 2 **Ethics Statement**

3 The Institutional Review Board (IRB) of the School of Public Health (Sun Yat-sen University,  
4 Guangzhou, China) reviewed and approved the study protocol. All study participants were asked to  
5 provide written informed consent.

### 6 **Study Site and Participants**

7 Guangdong, located in the Southern coast of China, is one of the most developed provinces.  
8 Meanwhile, Guangdong also is one of the HIV/AIDS and drug epidemic areas because it has  
9 cumulative reported 48,718 HIV-positive cases, ranking fifth among provinces in China as of October  
10 2014 [26], in addition, it has one-sixth of totally registered drug users in China [27].

11 This study was conducted in 14 MMT clinics located in 9 cities of Guangdong (According to  
12 whether the 1-year retention rate is above or below 50%, the 61 MMT clinics were divided into two  
13 groups, and seven clinics were randomly selected from each group [28]). We got permission and  
14 authorization to use and retrieve part of data for the selected MMT clinics from the Chinese National  
15 MMT Program data system. In this study, participants were eligible if they were (1) diagnosed with  
16 opioid dependence according to the International Classification of Diseases (10th Revision); (2) 18  
17 years or older; (3) tested to be HIV-positive at entry; (4) able to provide informed consent; and (5) had  
18 at least 10 records of urine morphine tests.

19 In this study, “drop-out” was defined as a participant failing to continue MMT for 14 consecutive  
20 days [28]. Based on whether drop-out happened before 12 months post-MMT initiation, the study  
21 period could be classified into two categories: one was defined as the duration between enrollment and  
22 dropout, the other was defined as the duration between enrolment and the end of the first 12 months.



## 1 Measures

### 2 *Self-reported Risk Behaviors*

3 At admission, as well as 6<sup>th</sup> and 12<sup>th</sup> month respectively, each participant was requested to  
4 complete a questionnaire covering demographic characteristics, drug use history including injecting  
5 drug and sharing needle/equipment, sexual activity history, and condom use status.

6 A client was regarded as having corresponding risk behaviors during the study period if he/she  
7 reported those behaviors either 6<sup>th</sup> or 12<sup>th</sup> interview (i.e. drug use behaviors including injecting drug  
8 and sharing needle/equipment; and risk sexual activities including, multiple sex partner, inconsistent  
9 condom use and sex trade for drugs.).

### 10 *Methadone Maintenance Doses and Attendance*

11 In China, to insure MMT security, clients are forbidden to take Methadone outside the clinic. Once  
12 enrolled in MMT, the clients must go to the clinic at consultation hours daily to take the prescribed  
13 doses of Methadone under the supervision of clinic staff, and the daily doses and date were routinely  
14 recorded in the national unified MMT management system. The treatment cost was RMB 10 Yuan  
15 (USD: 1.5 Dollar) per day regardless of the client' intake doses and times.

16 Average maintenance dose was obtained via computing the mean of daily prescribed doses (The  
17 doses of the first month were excluded because the first month of methadone maintenance treatment is  
18 to give doctor time to adjust appropriate dose for a client. Usually the dose starts from small, 20 mg to  
19 40 mg per day, and it will gradually increase slowly to certain amount.).

20 The percentage of MMT attendance was calculated based on proportion of days that a client  
21 actually received the doses over the study period.

### 22 *Positive Percentages of Urine Morphine Tests during the Study Period*

1  
2  
3  
4 1 A positive result of urine morphine test generally means heroin use by the clients within a few  
5  
6 2 days. Urine-based morphine tests were monthly performed on a random day during the study period.

7  
8  
9 3 As mentioned above, there exists a MMT dose adjustment stage for a new enrolled client. During  
10  
11 4 the adjustment stage, most clients often use opioid to adjust themselves to methadone maintenance  
12  
13 5 treatment. Therefore, the result of urine morphine test in the first month was excluded from calculation  
14  
15 6 of heroin use and percentages in our study.

16  
17  
18  
19 7 During the study period, a client was recognized as a heroin user as long as any urine morphine  
20  
21 8 test result was positive.

22  
23  
24 9 The percentage of heroin use was calculated based on the number of positive urine morphine test  
25  
26 10 results and the number of total urine test times during the study period.

27  
28  
29 11 Based on the urine morphine tests, the clients were currently grouped as “urine morphine (+)” and  
30  
31 12 “urine morphine (-)”. Additionally, the positive percentages were grouped as <20%, 20-60% and >60%  
32  
33 13 based on the data distribution.

#### 34 35 36 14 ***HIV and Urine Morphine Tests***

37  
38  
39 15 Except for those who were already confirmed as HIV-positive prior this study, each client was  
40  
41 16 invited to receive HIV testing. HIV infection status was screened using an enzyme-linked  
42  
43 17 immunosorbent assay (ELISA) technique (Beijing BGI-GBI Biotech Co., Ltd, Beijing, China). Positive  
44  
45 18 blood specimens for HIV were confirmed using a Western blot assay (Abbott, MP Biomedicals, LLC,  
46  
47 19 Singapore) by the local Centers for Disease Control (CDC). According to related national guidelines,  
48  
49 20 pre- and post- test counseling services were provided.

50  
51  
52  
53  
54 21 Random urine morphine status was screened using a Morphine Diagnostic Kit (Colloidal Gold)  
55  
56 22 technique (ABON Biopharm Co., Ltd, Hangzhou, China).

1  
2  
3  
4 **1 Statistical Analysis**  
5

6 Statistical analyses were performed using SPSS 17.0 for Windows (SPSS Inc., Chicago).  
7  
8  
9 3 Categorical variables were described with percentages. Multivariate ordinal logistic regression analysis  
10  
11 4 was conducted to predict higher percentages of heroin use from baseline information including  
12  
13 5 demographic, drug use and multiple sex partners, as well as average maintenance dose and percentages  
14  
15 6 of MMT attendance during the study period among the MMT clients with HIV/AIDS. Any  $p < 0.05$  was  
16  
17 7 considered to be statistically significant.  
18  
19  
20  
21  
22  
23  
24  
25  
26  
27  
28  
29  
30  
31  
32  
33  
34  
35  
36  
37  
38  
39  
40  
41  
42  
43  
44  
45  
46  
47  
48  
49  
50  
51  
52  
53  
54  
55  
56  
57  
58  
59  
60

## 1 Results

### 2 *Study Participants and Demographic Characteristics*

3 Among the 293 participants, 16.0% were elder than 40; 91.5% were males; 99.3% were ethnic  
4 Han (China's predominant ethnic group), 54.3% were never married; 21.8% just had elementary or  
5 lower education; 68.9% were unemployed and 64.2% obtained financial sources from their family or  
6 friends (Table 1).

### 7 *Heroin Use and Multiple Sex Partner at Baseline*

8 Table 1 presents baseline information on heroin use. Of the participants, 77.8% had used heroin  
9 for more than 10 years; 59.4% participants used heroin at least 3 times daily on average; the vast  
10 majority (98.6%) abused powdered heroin and 99.0% ever administered drug by injection. Among the  
11 IDUs, 56.6% ever shared intravenous needles. Only 13.7% never met the peer users.

12 Of these participants, 21.5% had had sexual activity with multiple sex partner (Table 1).

### 13 *Average Maintenance Doses and Attendance*

14 Among all participants, 46.8% had received doses below 60 ml and the average maintenance dose  
15 was (67.5 ± 28.7) ml.

16 In addition, 10.6% participants' MMT attendance percentages were less than 20% and only 40.6%  
17 were over 80% (Table 1).

### 18 *Positive Percentages of Urine Morphine Tests during the Study Period*

19 The median positive percentage of urine morphine tests was 48.6% for 2006, 48.7% for 2007, 44.0%  
20 for 2008, 41.2% for 2009, 43.3% for 2010, 43.4% for 2011 and 22.5% for 2013, respectively (Table 2).

21 Among the 268 urine morphine (+) clients, positive percentages of urine morphine tests that <20%,  
22 20%-60% and >60% were 25.4%, 36.1% and 38.5% respectively (Table 3).

1  
2  
3  
4 1 After adjusted for potential confounding variables listed in the table, multiple ordinal logistic  
5  
6 2 regression analysis indicated that a higher percentage of heroin use was independently associated with  
7  
8  
9 3 age, employment status, mainly financial sources and percentages of MMT attendance. Participants  
10  
11 4 who were younger ( $OR_{\leq 30}=0.31$ , 95%CI: 0.2-0.78;  $OR_{31-35}=0.44$ , 95%CI: 0.20-1.00), and got money  
12  
13 5 from family or friends ( $OR=0.55$ , 95%CI: 0.32-0.93) were more likely to be tested as having lower  
14  
15 6 percentages of heroin use; and those who were unemployed ( $OR=1.99$ , 95%CI: 1.13-3.49) and had  
16  
17 7 poor MMT attendance percentages ( $OR_{<20}=3.60$ , 95%CI: 1.55-8.33;  $OR_{20-}=2.80$ , 95%CI: 1.48-5.33)  
18  
19 8 were more likely to have higher percentages of heroin use (Table 4).  
20  
21  
22  
23

24 9 ***Self-reported High Risk Behaviors during the Study Period***

25  
26 10 Among the clients with urine morphine (+), 99.3% (266 of 268) and 88.1% (236 of 268)  
27  
28 11 completed the 6<sup>th</sup> and 12<sup>th</sup> month follow-up interviews respectively. Of the 266 clients completed at  
29  
30 12 least one follow-up interview, 62.8% ever used drugs, 85.0% used intravenous drugs, and 25.4% ever  
31  
32 13 shared intravenous needles; 63.2% were sexual active, 29.2% had sex with multiple sex partners, and  
33  
34 14 43.5% never used condom during the sexual course. Also, 14.5% traded sex for drugs (Table 5).  
35  
36  
37  
38  
39  
40  
41  
42  
43  
44  
45  
46  
47  
48  
49  
50  
51  
52  
53  
54  
55  
56  
57  
58  
59  
60

## 1 Discussion

2 Heroin use among MMT clients has been reported substantially worldwide [15, 16]. HIV-positive  
3 drug users are a unique subgroup for playing a “dual bridge” role in HIV transmission. This study is an  
4 extension of our previous study [25]. Our results were based on random, long-term and consecutive  
5 urine tests, which was blind to clients in case those continued heroin users deliberately avoid the test  
6 time.

7 Findings from the current analysis revealed that there were 91.5% participants had used heroin at  
8 least once during the study period, which was higher than that (75%) of general MMT clients reported  
9 by our prior study [25]. Findings also showed that 14.2% almost always used heroin. Given that  
10 continued heroin use might lead to adverse health outcomes [20, 23] and high drop-out rate [24] among  
11 MMT clients with HIV/AIDS, targeted interventions and control programs are urgently needed for this  
12 subgroup.

13 Compared to the young participants, the elders showed greater likelihood of continued heroin use.  
14 Many elders had turned from clinical latency stage to AIDS stage and they may experience more pain  
15 and psychological symptoms [29, 30]. Studies had shown that depressive symptoms are common  
16 among people with HIV infection [31, 32]. However, MMT improvements in depressive symptoms and  
17 the physical domain of QOL (quality of life) among HIV-positive heroin users were poorer than in  
18 those without HIV infection [33]. Also, most of them had lost the courage and confidence to live on.  
19 Culturally, stigma and discrimination towards drug use and HIV/AIDS might seriously impede the  
20 MMT attendance [34]. In addition, inappropriate perceptions of MMT should not be neglected [35].

21 Previous research has documented that the clients who were employed were more likely to use  
22 heroin during the treatment period [36]. In contrast, we found that the unemployed had more likelihood

1  
2  
3  
4 1 with concurrent heroin use. This was possibly due to the unemployed (1) lacked social support; (2) had  
5  
6 2 more time to communicate with former drug taking peers. There was a big difference between the  
7  
8 3 employed and the unemployed not only in terms of sociodemographic factors but also the family tie,  
9  
10 4 which in turn influenced concurrent heroin use [25, 37].  
11  
12

13  
14 5 Generally, high drug fee generally made the drug users can't afford it. In our study, the clients  
15  
16 6 whose financial sources depend on family or friends were less likely to use heroin. Money from family  
17  
18 7 or friends is meant to support basic life and is far not enough to meet drug expenditure. Furthermore,  
19  
20 8 drug use and MMT is regarded as a family issue in China, and family or friends' support might  
21  
22 9 potentially supervise and encourage treatment participation and compliance [25, 37].  
23  
24

25  
26 10 There has been controversy over whether higher Methadone doses could decrease heroin use  
27  
28 11 among MMT clients. Studies showed an appropriate MMT dose is the most effective in suppressing  
29  
30 12 heroin use in treatment [18, 38]. There were also further research suggesting that an adequate dose of  
31  
32 13 Methadone (e.g., 80-120 mgs/day) would significantly reduce heroin use among clients within the first  
33  
34 14 two months of treatment and eventually either eliminated or significantly curtailed with time in  
35  
36 15 treatment [39, 40]. However, other studies revealed there was no correlation between Methadone doses  
37  
38 16 and heroin use in treatment [41, 42]. The Methadone dose was  $\geq 60$  mg/day recommended by US  
39  
40 17 National Institutes of Health [43], and should be higher for HIV-positive individuals [44]. We found  
41  
42 18 46.8% participants' doses were less than 60 mg/day. Compared to those with higher doses, we did not  
43  
44 19 find the clients with lower doses were more likely to use heroin. Given the small sample size and  
45  
46 20 short-term observation, further large sample size and stratified dose research are needed.  
47  
48  
49  
50  
51  
52

53  
54 21 Without exception, treatment effectiveness relies upon sufficient levels of medication adherence.  
55  
56 22 MMT requires long-term or even life-long intake of Methadone at an adequate dose on a daily basis  
57  
58  
59  
60

1 [45]. We found that the lower attendance meant the higher percentage of heroin use. This was  
2 consistent with our prior study [25]. Continued heroin users attended MMT programs irregularly and  
3 the attendance significantly declined with the duration that they retained in treatment program [46].  
4 Poorer attendance seeded continued heroin use. In addition, misconceptions might predict poor  
5 adherence among newly admitted MMT clients [47]. So, future research might need to develop and/or  
6 integrate other necessary interventions to encourage client adherence to the treatment program.

7 HIV-positive drug users have been regarded as a “dual risk” subgroup. They transmit HIV via  
8 either sharing needles or having unprotected sexual intercourse with partners. Currently, sexual  
9 transmission is the most prevalent spread pattern of HIV/AIDS in China [5]. Among the participants  
10 who finished at least once interview, 25.4% ever shared needle; 29.2% ever had sex with multiple  
11 partners; 43.5% never used condom and 14.5% had sex for drugs during the study period. Considering  
12 the potential bridge role of those with dual risk behaviors in transmitting HIV to others, research on the  
13 interaction of HIV-positive MMT clients and risk behaviors should be given high priority. Data showed  
14 that changing unsafe drug use behaviors was more effective than changing unsafe sexual behaviors [17].  
15 In future treatment procedures, physicians and nurses should play an active role in educating clients  
16 about safe sex and encourage clients to use condoms.

17 This study is subject to certain limitations. Firstly, self-reported data are subject to recall bias or  
18 deliberate concealment. Secondly, China is experiencing a significant increase in the use of new drugs  
19 [2], but this study did not consider it. In addition, we failed to obtain the ART (anti-retroviral treatment)  
20 information, and future studies should be extended to analyze ART as predictor variable to continued  
21 heroin use. Thirdly, we only examined the percentages of heroin use during the first 12 months after  
22 receiving MMT, and did not take 12+ months into consideration due to the limited sample size and



1 high drop-out.

2 In summary, findings from this study provide important implications for future MMT programs  
3 targeting continued heroin use among HIV-positive clients. Concretely, first, continuous and efficient  
4 MMT consulting and health education interventions need to be conducted for reducing continued  
5 heroin use. Interventions involving family members in supervision of participation and compliance  
6 should be reinforced. Second, attendance are crucial components affecting MMT<sup>7</sup> outcomes, so how to  
7 improve sufficient attendance have become issues of great urgency.

8

9

10

For peer review only

1  
2  
3  
4  
5  
6  
7  
8  
9  
10  
11  
12  
13  
14  
15  
16  
17  
18  
19  
20  
21  
22  
23  
24  
25  
26  
27  
28  
29  
30  
31  
32  
33  
34  
35  
36  
37  
38  
39  
40  
41  
42  
43  
44  
45  
46  
47  
48  
49  
50  
51  
52  
53  
54  
55  
56  
57  
58  
59  
60

## 1 **Role of Funding Source**

2 This study was supported by the National Natural Science Foundation of China (grant no.  
3 71173245 and 81473065 to L.L.) and China Medical Board (12-111 to L.L.).The funding agencies play  
4 no role in the study design, data collection, and data analysis, interpretation of study results and writing  
5 of the manuscript.

## 6 **Contributors**

7 XL designed the study, performed data analysis and wrote the draft manuscript. XG and PZ  
8 performed data analysis. XZ and WC collected the data. LL supervised the study. All authors  
9 contributed to the interpretation of the data and approved the final version for submission.

## 10 **Conflict of Interest**

11 The authors declare no conflicts of interest.

## 12 **Data Sharing Statement**

13 No additional unpublished data are available.

## 14 **Acknowledgements**

15 We are grateful to the staff of MMT clinics in the study site for their valuable assistance in subject  
16 recruitment and data collection. We appreciate the HIV-positive MMT participants spending time and  
17 sharing with us regarding their information.

18

**References:**

1. Zhao M, Ling W. HIV/AIDS and Drug Use in China—Interactions, Impacts, and Issues. *Substance Use & Misuse*. 2012; 47: 1015-1025.
2. The State Council Information Office of the People's Republic of China. 2014 annual report on drug situation in China., 2014.
3. Jia M, Luo H, Ma Y, Wang N, Smith K, Mei J, et al. The HIV epidemic in Yunnan Province, China, 1989-2007. *J Acquir Immune Defic Syndr*. 2010; 53 Suppl 1: S34-40.
4. Bao YP, Liu ZM. Systematic review of HIV and HCV infection among drug users in China. *International Journal of STD & AIDS*. 2009; 20: 399-405.
5. UNAIDS. 2014 China AIDS Response Progress Report., 2014.
6. Wu Z. Landmark government methadone maintenance program in mainland China. "15th International AIDS Conference", 2004.
7. Yin W, Hao Y, Sun X, Gong X, Li F, Li J, et al. Scaling up the national methadone maintenance treatment program in China: achievements and challenges. *International Journal of Epidemiology*. 2010; 39: ii29-ii37.
8. Zou X, Ling L, Zhang L. Trends and risk factors for HIV, HCV and syphilis seroconversion among drug users in a methadone maintenance treatment programme in China: a 7-year retrospective cohort study. *BMJ Open*. 2015; 5: e008162.
9. Dai J, Zhao L, Liang Y. Policy implementation of methadone maintenance treatment and HIV infection: evidence from Hubei province, China. *Subst Abuse Treat Prev Policy*. 2013; 8: 38.
10. Sun HM, Li XY, Chow EPF, Li T, Xian Y, Lu YH, et al. Methadone maintenance treatment programme reduces criminal activity and improves social well-being of drug users in China: a

- 1  
2  
3  
4 1 systematic review and meta-analysis. *BMJ Open*. 2015; 5: e005997-e005997.
- 5  
6 11. Zhao Y, Shi CX, McGoogan JM, Rou K, Zhang F, Wu Z. Methadone maintenance treatment and  
7  
8 mortality in HIV-positive people who inject opioids in China. *Bulletin of the World Health*  
9  
10 *Organization*. 2013; 91: 93-101.
- 11  
12 12. Reddon H, Milloy MJ, Simo A, Montaner J, Wood E, Kerr T. Methadone Maintenance Therapy  
13  
14 Decreases the Rate of Antiretroviral Therapy Discontinuation Among HIV-Positive Illicit Drug  
15  
16 Users. *AIDS and Behavior*. 2014; 18: 740-746.
- 17  
18 13. National Health And Family Planning Commission Of PRC. The national health and family  
19  
20 planning commission published online., 2015.
- 21  
22 14. Wang R, Ding Y, Bai H, Duan S, Ye R, Yang Y, et al. Illicit Heroin and Methamphetamine Use  
23  
24 among Methadone Maintenance Treatment Patients in Dehong Prefecture of Yunnan Province,  
25  
26 China. *PLOS ONE*. 2015; 10: e0133431.
- 27  
28 15. Sullivan SG, Wu Z, Cao X, Liu E, Detels R. Continued drug use during methadone treatment in  
29  
30 China: A retrospective analysis of 19,026 service users. *Journal of Substance Abuse Treatment*.  
31  
32 2014; 47: 86-92.
- 33  
34 16. Li L, Lin C, Wan D, Zhang L, Lai W. Concurrent heroin use among methadone maintenance clients  
35  
36 in China. *Addictive Behaviors*. 2012; 37: 264-268.
- 37  
38 17. Zhang L, Chow EP, Zhuang X, Liang Y, Wang Y, Tang C, et al. Methadone maintenance treatment  
39  
40 participant retention and behavioural effectiveness in China: a systematic review and meta-analysis.  
41  
42 *PLoS One*. 2013; 8: e68906.
- 43  
44 18. Leri F, Bruneau J, Stewart J. Understanding polydrug use: review of heroin and cocaine co-use.  
45  
46  
47  
48  
49  
50  
51  
52  
53  
54  
55  
56  
57  
58  
59  
60  
60

- 1  
2  
3  
4 19. Jimenez-Treviño L, Saiz PA, García-Portilla MP, Díaz-Mesa EM, Sánchez-Lasheras F, Burón P, et  
5  
6 al. A 25-year follow-up of patients admitted to methadone treatment for the first time: Mortality  
7  
8 and gender differences. *Addictive Behaviors*. 2011; 36: 1184-1190.  
9
- 10 20. McCowan C, Kidd B, Fahey T. Factors associated with mortality in Scottish patients receiving  
11  
12 methadone in primary care: retrospective cohort study. *BMJ*. 2009; 338: b2225.  
13
- 14 21. Darke S, Ross J, Hall W. Overdose among heroin users in Sydney, Australia: II. responses to  
15  
16 overdose. *Addiction*. 1996; 91: 413-7.  
17
- 18 22. Darke S, Ross J, Hall W. Overdose among heroin users in Sydney, Australia: I. Prevalence and  
19  
20 correlates of non-fatal overdose. *Addiction*. 1996; 91: 405-11.  
21
- 22 23. Green TC, McGowan SK, Yokell MA, Pouget ER, Rich JD. HIV infection and risk of overdose: a  
23  
24 systematic review and meta-analysis. *AIDS*. 2012; 26: 403-417.  
25
- 26 24. Jiang H, Cao X, Wang C, Luo W, Li J, Rou K, et al. Study on the adherence and related  
27  
28 determinants among HIV-positive clients under methadone maintenance treatment in Dali, Yunnan  
29  
30 province from 2005 to 2013. *Chin J Epidemiol*. 2014; 35: 255-258.  
31
- 32 25. Luo X, Zhao P, Gong X, Zhang L, Tang W, Zou X, et al. Concurrent Heroin Use and Correlates  
33  
34 among Methadone Maintenance Treatment Clients: A 12-Month Follow-up Study in Guangdong  
35  
36 Province, China. *International Journal of Environmental Research and Public Health*. 2016; 13:  
37  
38 305.  
39
- 40 26. NetEase. Guangdong had cumulatively reported 48,718 HIV-infected individuals, ranking fifth  
41  
42 position in China., 2014.  
43
- 44 27. China. Org. Cn. Guangdong has the largest number of registered drug users (457,000), accounting  
45  
46 for one-sixth of the total registered drug users of China., 2014.  
47  
48  
49  
50  
51  
52  
53  
54  
55  
56  
57  
58  
59  
60

- 1  
2  
3  
4 1 28. Zhang L, Zou X, Zhang D, Li X, Zhao P, Ling L. Investigation of Repeat Client Drop-Out and  
5  
6 2 Re-Enrolment Cycles in Fourteen Methadone Maintenance Treatment Clinics in Guangdong, China.  
7  
8 3 PLOS ONE. 2015; 10: e0139942.  
9  
10  
11 4 29. Rodriguez-Penney AT, Iudicello JE, Riggs PK, Doyle K, Ellis RJ, Letendre SL, et al.  
12  
13 5 Co-Morbidities in Persons Infected with HIV: Increased Burden with Older Age and Negative  
14  
15 6 Effects on Health-Related Quality of Life. AIDS Patient Care and STDs. 2013; 27: 5-16.  
16  
17  
18 7 30. Tsao JC, Plankey MW, Young MA. Pain, psychological symptoms and prescription drug misuse in  
19  
20 8 HIV: A literature review. J Pain Manag. 2012; 5: 111-118.  
21  
22  
23 9 31. Edelman EJ, Gordon K, Becker WC, Goulet JL, Skanderson M, Gaither JR, et al. Receipt of opioid  
24  
25 10 analgesics by HIV-infected and uninfected patients. J Gen Intern Med. 2013; 28: 82-90.  
26  
27  
28 11 32. Sherr L, Clucas C, Harding R, Sibley E, Catalan J. HIV and Depression - a systematic review of  
29  
30 12 interventions. PSYCHOLOGY HEALTH & MEDICINE. 2011; 16: 493-527.  
31  
32  
33 13 33. Wang P, Lin H, Yen C, Yeh Y, Hsu C, Chung K, et al. Comparison of outcomes after 3-month  
34  
35 14 methadone maintenance treatment between heroin users with and without HIV infection: a 3-month  
36  
37 15 follow-up study. Harm Reduction Journal. 2015; 12.  
38  
39  
40 16 34. Liu H, Li J, Lu Z, Liu W, Zhang Z. Does Chinese culture influence psychosocial factors for heroin  
41  
42 17 use among young adolescents in China? A cross-sectional study. BMC Public Health. 2010; 10:  
43  
44 18 563.  
45  
46  
47 19 35. Xu H, Gu J, Lau JTF, Zhong Y, Fan L, Zhao Y, et al. Misconceptions toward methadone  
48  
49 20 maintenance treatment (MMT) and associated factors among new MMT users in Guangzhou,  
50  
51 21 China. Addictive Behaviors. 2012; 37: 657-662.  
52  
53  
54 22 36. Cao XB, Yin WY, Pang L, Zhang CB, Xu JS, Xiao YK, et al. Risk factors which were associated  
55  
56  
57  
58  
59  
60

- 1  
2  
3  
4 1 with heroin use during the methadone maintenance treatment among 1301 patients in 9 cities of  
5  
6 2 China. *Zhonghua Liu Xing Bing Xue Za Zhi*. 2010; 31: 269-72.
- 7  
8  
9 3 37. Lin C, Wu Z, Detels R. Family support, quality of life and concurrent substance use among  
10  
11 4 methadone maintenance therapy clients in China. *Public Health*. 2011; 125: 269-274.
- 12  
13 5 38. Amato L, Davoli M, Perucci CA, Ferri M, Faggiano F, Mattick RP. An overview of systematic  
14  
15 6 reviews of the effectiveness of opiate maintenance therapies: available evidence to inform clinical  
16  
17 7 practice and research. *Journal of Substance Abuse Treatment*. 2005; 28: 321-329.
- 18  
19  
20 8 39. Dole VP, Nyswander ME, Kreek MJ. Narcotic blockade. 1966. *J Psychoactive Drugs*. 1991; 23:  
21  
22 9 following 232.
- 23  
24  
25 10 40. Cooper JR. Ineffective use of psychoactive drugs. Methadone treatment is no exception. *Jama the*  
26  
27 11 *Journal of the American Medical Association*. 1992; 267: 281-2.
- 28  
29  
30 12 41. Cao XB, Yin WY, Pang L, Zhang CB, Xu JS, Xiao YK, et al. Risk factors which were associated  
31  
32 13 with heroin use during the methadone maintenance treatment among 1301 patients in 9 cities of  
33  
34 14 China. *Zhonghua Liu Xing Bing Xue Za Zhi*. 2010; 31: 269-72.
- 35  
36  
37 15 42. Brown BS, Watters JK, Iglehart AS. Methadone maintenance dosage levels and program retention.  
38  
39 16 *Am J Drug Alcohol Abuse*. 1982; 9: 129-139.
- 40  
41  
42 17 43. Conference NC. Effective medical treatment of opiate addiction. National Consensus Development  
43  
44 18 Panel on Effective Medical Treatment of Opiate Addiction. *JAMA*. 1998; 280: 1936-43.
- 45  
46  
47 19 44. Liu E, Rou K, McGoogan JM, Pang L, Cao X, Wang C, et al. Factors Associated With Mortality of  
48  
49 20 HIV-Positive Clients Receiving Methadone Maintenance Treatment in China. *Journal of Infectious*  
50  
51 21 *Diseases*. 2013; 208: 442-453.
- 52  
53  
54  
55  
56 22 45. Mattick RP, Breen C, Kimber J, Davoli M. Methadone maintenance therapy versus no opioid  
57  
58  
59  
60

- 1 replacement therapy for opioid dependence. Cochrane Database Syst Rev. 2009CD002209.
- 2
- 3
- 4 1 replacement therapy for opioid dependence. Cochrane Database Syst Rev. 2009CD002209.
- 5
- 6 46. Che Y, Assanangkornchai S, McNeil E, Li J, You J, Chongsuvivatwong V. Patterns of attendance
- 7
- 8 in methadone maintenance treatment program in Yunnan Province, China. The American Journal
- 9
- 10 of Drug and Alcohol Abuse. 2011; 37: 148-154.
- 11
- 12
- 13 47. Gu J, Xu H, Lau JTF, Hao Y, Zhong Y, Fan L, et al. Misconceptions predict dropout and poor
- 14
- 15 adherence prospectively among newly admitted first-time methadone maintenance treatment clients
- 16
- 17 in Guangzhou, China. Addiction. 2012; 107: 1641-1649.
- 18
- 19
- 20
- 21
- 22
- 23
- 24
- 25
- 26
- 27
- 28
- 29
- 30
- 31
- 32
- 33
- 34
- 35
- 36
- 37
- 38
- 39
- 40
- 41
- 42
- 43
- 44
- 45
- 46
- 47
- 48
- 49
- 50
- 51
- 52
- 53
- 54
- 55
- 56
- 57
- 58
- 59
- 60



## 1 Tables

## 2 Table1. Characteristics of the participants (n=293)

| Characteristics                               | Urine Morphine(-)     | Urine Morphine(+)     | Total                 |
|-----------------------------------------------|-----------------------|-----------------------|-----------------------|
|                                               | (n=25)                | (n=268)               | (N=293)               |
|                                               | No. (% <sup>a</sup> ) | No. (% <sup>a</sup> ) | No. (% <sup>b</sup> ) |
| Age at Baseline (years)                       |                       |                       |                       |
| ≤30                                           | 5(7.5)                | 62(92.5)              | 67(22.9)              |
| 31-                                           | 9(10.1)               | 80(89.9)              | 89(30.4)              |
| 36-                                           | 7(7.8)                | 83(92.2)              | 90(30.7)              |
| ≥41                                           | 4(8.5)                | 43(91.5)              | 47(16.0)              |
| Gender                                        |                       |                       |                       |
| Male                                          | 25(9.3)               | 243(90.7)             | 268(91.5)             |
| Female                                        | 0(0)                  | 25(100.0)             | 25(8.5)               |
| Ethnic                                        |                       |                       |                       |
| Han                                           | 25(8.6)               | 266(91.4)             | 291(99.3)             |
| Others                                        | 0(0)                  | 2(100.0)              | 2(0.7)                |
| Marital Status at Baseline                    |                       |                       |                       |
| Never married                                 | 17(10.7)              | 142(89.3)             | 159(54.3)             |
| Married currently                             | 5(5.2)                | 92(94.8)              | 97(33.1)              |
| Others                                        | 3(8.1)                | 34(91.9)              | 37(12.6)              |
| Education Level                               |                       |                       |                       |
| Elementary or lower                           | 1(1.6)                | 63(98.4)              | 64(21.8)              |
| Juniorhigh school                             | 18(9.4)               | 174(90.6)             | 192(65.5)             |
| Senior high school or higher                  | 6(16.2)               | 31(83.8)              | 37(12.6)              |
| Employed Status at Baseline                   |                       |                       |                       |
| Unemployed                                    | 16(7.9)               | 186(92.1)             | 202(68.9)             |
| Employed                                      | 9(9.9)                | 82(90.1)              | 91(31.1)              |
| Mainly Financial Sources at Baseline          |                       |                       |                       |
| Family or friends                             | 19(10.1)              | 169(89.9)             | 188(64.2)             |
| Others                                        | 6(5.7)                | 99(94.3)              | 105(35.8)             |
| Duration of Drug Abuse (years)                |                       |                       |                       |
| ≤10                                           | 3(4.6)                | 62(95.4)              | 65(22.2)              |
| 11-15                                         | 12(9.2)               | 118(90.8)             | 130(44.4)             |
| ≥16                                           | 10(10.2)              | 88(89.8)              | 98(33.4)              |
| Type of Drug Use at Baseline                  |                       |                       |                       |
| Heroin                                        | 25(8.7)               | 264(91.3)             | 289(98.6)             |
| Others                                        | 0(0)                  | 4(100.0)              | 4(1.4)                |
| Intravenous Drug Use at Baseline              |                       |                       |                       |
| Yes                                           | 25(8.6)               | 265(91.4)             | 290(99.0)             |
| No                                            | 0(0)                  | 3(100.0)              | 3(1.0)                |
| Shared Needles to Inject Drugs at Baseline    |                       |                       |                       |
| Yes                                           | 11(6.7)               | 153(93.3)             | 164(56.6)             |
| No                                            | 14(11.1)              | 112(88.9)             | 126(43.4)             |
| Average Times of Drug Use per Day at Baseline |                       |                       |                       |

|                                    |          |           |           |
|------------------------------------|----------|-----------|-----------|
| ≤2                                 | 10(8.4)  | 109(91.6) | 119(40.6) |
| ≥3                                 | 15(8.6)  | 159(91.4) | 174(59.4) |
| Multiple Sex Partners at Baseline  |          |           |           |
| Yes                                | 4(6.3)   | 59(93.7)  | 63(21.5)  |
| No                                 | 21(9.1)  | 209(90.9) | 230(78.5) |
| Average Maintenance Doses (ml/day) |          |           |           |
| ≥60                                | 18(11.5) | 138(88.5) | 156(53.2) |
| <60                                | 7(5.1)   | 130(94.9) | 137(46.8) |
| Percentages of MMT Attendance (%)  |          |           |           |
| <20                                | 1(3.2)   | 30(96.8)  | 31(10.6)  |
| 20-                                | 4(6.1)   | 62(93.9)  | 66(22.5)  |
| 50-                                | 4(5.2)   | 73(94.8)  | 77(26.3)  |
| ≥80%                               | 16(13.4) | 103(86.6) | 119(40.6) |

<sup>a</sup> calculated by row, <sup>b</sup> calculated by column.

1 Table 2 Urine morphine tests results at the different entrant year and followed month (n=293)

| Year | Positive percentage of urine morphine tests by month (% , n/N) |             |             |             |             |             |             |             |             |             |             |             | Median (IQR)    |
|------|----------------------------------------------------------------|-------------|-------------|-------------|-------------|-------------|-------------|-------------|-------------|-------------|-------------|-------------|-----------------|
|      | 1                                                              | 2           | 3           | 4           | 5           | 6           | 7           | 8           | 9           | 10          | 11          | 12          |                 |
| 2006 | 97.1(34/35)                                                    | 48.6(17/35) | 45.7(16/35) | 37.1(13/35) | 60.0(21/35) | 45.7(16/35) | 54.3(19/35) | 48.6(17/35) | 54.3(19/35) | 60.0(21/35) | 37.5(12/32) | 46.9(15/32) | 48.6(45.7-58.6) |
| 2007 | 92.3(72/78)                                                    | 55.1(43/78) | 50.0(39/78) | 43.6(34/78) | 47.4(37/78) | 51.3(40/78) | 50.0(39/78) | 42.3(33/78) | 50.0(39/78) | 46.2(36/78) | 44.4(32/72) | 44.3(31/70) | 48.7(44.3-51.0) |
| 2008 | 96.6(56/58)                                                    | 50.0(29/58) | 46.6(27/58) | 48.3(28/58) | 51.7(30/58) | 41.4(24/58) | 34.5(20/58) | 39.7(23/58) | 39.7(23/58) | 39.7(23/58) | 39.7(23/58) | 49.1(28/57) | 44.0(39.7-49.8) |
| 2009 | 97.7(42/43)                                                    | 62.8(27/43) | 41.9(18/43) | 41.9(18/43) | 58.1(25/43) | 39.5(17/43) | 44.2(19/43) | 27.9(12/43) | 37.2(12/43) | 37.2(16/43) | 40.5(17/42) | 31.7(13/41) | 41.2(37.2-54.6) |
| 2010 | 96.7(29/30)                                                    | 50.0(15/30) | 53.3(16/30) | 50.0(15/30) | 40.0(12/30) | 40.0(12/30) | 43.3(13/30) | 43.3(13/30) | 46.7(14/30) | 40.0(12/30) | 35.7(10/28) | 37.0(10/27) | 43.3(40.0-50.0) |
| 2011 | 100.0(38/38)                                                   | 55.3(21/38) | 47.4(18/38) | 42.1(16/38) | 39.5(15/38) | 42.1(16/38) | 57.9(22/38) | 44.7(17/38) | 44.7(17/38) | 42.1(16/38) | 36.4(12/33) | 41.9(13/31) | 43.4(42.0-53.3) |
| 2012 | 90.0(10/11)                                                    | 45.5(5/11)  | 9.1(1/11)   | 9.1(1/11)   | 27.3(3/11)  | 27.3(3/11)  | 18.2(2/11)  | 27.3(3/11)  | 9.1(1/11)   | 18.2(2/11)  | 20.0(2/10)  | 25.0(2/8)   | 22.5(11.4-27.3) |

2

1 Table 3 The distribution of positive percentages of urine morphine tests among the urine morphine  
2 (+) participants during the study period (n =268)

| Positive percentage (%) | Number (n) | Percentage (%) |
|-------------------------|------------|----------------|
| <10                     | 34         | 12.7           |
| 10-                     | 34         | 12.7           |
| 20-                     | 29         | 10.8           |
| 30-                     | 28         | 10.4           |
| 40-                     | 22         | 8.2            |
| 50-                     | 18         | 6.7            |
| 60-                     | 23         | 8.6            |
| 70-                     | 20         | 7.5            |
| 80-                     | 22         | 8.2            |
| 90-                     | 38         | 14.2           |
| total                   | 268        | 100.0          |

3

4

1 Table4. Correlates of higher positive percentages among urine morphine (+) participants during  
 2 the study period (n=268)

| Characteristics                    | <20%<br>(n=68)<br>No. (%)* | 20%-60%<br>(n=97)<br>No. (%)* | >60%<br>(n=103)<br>No. (%)* | OR(95%CI) <sup>a, b</sup> | <i>p</i> <sup>b</sup> |
|------------------------------------|----------------------------|-------------------------------|-----------------------------|---------------------------|-----------------------|
| Age (years)                        |                            |                               |                             |                           |                       |
| ≤30                                | 20(32.3)                   | 28(45.2)                      | 14(22.6)                    | 0.31(0.12-0.78)           | <b>0.013</b>          |
| 31-                                | 22(27.5)                   | 26(32.5)                      | 32(40.0)                    | 0.44(0.20-1.00)           | <b>0.051</b>          |
| 36-                                | 13(15.7)                   | 33(39.8)                      | 37(44.6)                    | 0.91(0.43-1.93)           | 0.814                 |
| ≥41                                | 13(30.2)                   | 10(23.3)                      | 20(46.5)                    | 1.00                      |                       |
| Gender                             |                            |                               |                             |                           |                       |
| Male                               | 60(24.7)                   | 90(37.0)                      | 93(38.3)                    | 0.97(0.42-2.22)           | 0.944                 |
| Female                             | 8(32.0)                    | 7(28.0)                       | 10(40.0)                    | 1.00                      |                       |
| Marital Status                     |                            |                               |                             |                           |                       |
| Never married                      | 36(25.4)                   | 54(38.0)                      | 52(36.6)                    | 2.04(0.92-4.55)           | 0.080                 |
| Married Currently                  | 23(25.0)                   | 29(31.5)                      | 40(43.5)                    | 1.93(0.85-4.40)           | 0.117                 |
| Others                             | 9(26.5)                    | 14(41.2)                      | 11(32.4)                    | 1.00                      |                       |
| Education Level                    |                            |                               |                             |                           |                       |
| Elementary or lower                | 16(25.4)                   | 24(38.1)                      | 23(36.5)                    | 1.50(0.64-3.50)           | 0.347                 |
| Juniorhigh school                  | 45(25.9)                   | 58(33.3)                      | 71(40.8)                    | 1.48(0.71-3.12)           | 0.298                 |
| Senior high school or higher       | 7(22.6)                    | 15(48.4)                      | 9(29.0)                     | 1.00                      |                       |
| Employment Status at Baseline      |                            |                               |                             |                           |                       |
| Unemployed                         | 45(24.2)                   | 64(34.4)                      | 77(41.4)                    | 1.99(1.13-3.49)           | <b>0.017</b>          |
| Employed                           | 23(28.0)                   | 33(40.2)                      | 26(31.7)                    | 1.00                      |                       |
| Mainly Financial Sources           |                            |                               |                             |                           |                       |
| Family or friends                  | 49(29.0)                   | 60(35.5)                      | 60(35.5)                    | 0.55(0.32-0.93)           | <b>0.025</b>          |
| Others                             | 19(19.2)                   | 37(37.4)                      | 43(43.4)                    | 1.00                      |                       |
| Duration of Drug Abuse (years)     |                            |                               |                             |                           |                       |
| ≤10                                | 18(29.0)                   | 21(33.9)                      | 23(37.1)                    | 1.04(0.50-2.16)           | 0.923                 |
| 11-15                              | 27(22.9)                   | 46(39.0)                      | 45(38.1)                    | 1.38(0.75-2.55)           | 0.305                 |
| ≥16                                | 23(26.1)                   | 30(34.1)                      | 35(39.8)                    | 1.00                      |                       |
| Average Times of Drug Use per Day  |                            |                               |                             |                           |                       |
| ≤2                                 | 21(19.3)                   | 47(43.1)                      | 41(37.6)                    | 1.03(0.62-1.71)           | 0.912                 |
| ≥3                                 | 47(29.6)                   | 50(31.4)                      | 62(39.0)                    | 1.00                      |                       |
| Shared Needles at Baseline         |                            |                               |                             |                           |                       |
| Yes                                | 38(24.8)                   | 59(38.6)                      | 56(36.6)                    | 1.03(0.63-1.69)           | 0.902                 |
| No                                 | 30(26.1)                   | 38(33.0)                      | 47(40.9)                    | 1.00                      |                       |
| Multiple Sex Partners at Baseline  |                            |                               |                             |                           |                       |
| Yes                                | 12 (20.3)                  | 17(28.8)                      | 30(50.8)                    | 1.65(0.89-3.05)           | 0.113                 |
| No                                 | 56(26.8)                   | 80(38.3)                      | 73(34.9)                    | 1.00                      |                       |
| Average Maintenance Doses (ml/day) |                            |                               |                             |                           |                       |
| ≥60                                | 36(26.1)                   | 56(40.6)                      | 46(33.3)                    | 0.92(0.57-1.49)           | 0.742                 |
| <60                                | 32(24.6)                   | 41(31.5)                      | 57(43.8)                    | 1.00                      |                       |
| Percentages of MMT Attendance (%)  |                            |                               |                             |                           |                       |

|      |          |          |          |                 |              |
|------|----------|----------|----------|-----------------|--------------|
| <20  | 4(13.3)  | 9(30.0)  | 17(56.7) | 3.60(1.55-8.33) | <b>0.003</b> |
| 20-  | 10(16.1) | 19(30.6) | 33(53.2) | 2.80(1.48-5.33) | <b>0.002</b> |
| 50-  | 22(30.1) | 32(43.8) | 19(26.0) | 0.94(0.53-1.67) | 0.841        |
| ≥80% | 32(31.1) | 37(35.9) | 34(33.0) | 1.00            |              |

1 <sup>a</sup> OR: Odds Ratio, CI: Confidence Interval;

2 <sup>b</sup> Obtained from multivariate ordinal logistic regression analysis adjusting for potential confounding variables  
 3 listed in the table;

4 \*Proportions were calculated in the row.

For peer review only

1 Table5. Self-reported risk behaviors among urine morphine (+) participants during the study  
 2 period (n=266)

| Characteristics               | <20%                  | 20%-60%               | >60%                  | Total                 |
|-------------------------------|-----------------------|-----------------------|-----------------------|-----------------------|
|                               | No. (% <sup>a</sup> ) | No. (% <sup>a</sup> ) | No. (% <sup>a</sup> ) | No. (% <sup>b</sup> ) |
| Drug Use (n=266)              |                       |                       |                       |                       |
| Yes                           | 26(15.6)              | 55(32.9)              | 86(51.5)              | 167(62.8)             |
| No                            | 41(41.4)              | 41(41.4)              | 17(17.2)              | 99(37.2)              |
| Injected Drugs (n=167)        |                       |                       |                       |                       |
| Yes                           | 21(14.8)              | 44(31.0)              | 77(54.2)              | 142(85.0)             |
| No                            | 5(20.0)               | 11(44.0)              | 9(36.0)               | 25(15.0)              |
| Shared Needles (n=142)        |                       |                       |                       |                       |
| Yes                           | 3(8.3)                | 11(30.6)              | 22(61.1)              | 36(25.4)              |
| No                            | 18(17.0)              | 33(31.1)              | 55(51.9)              | 106(74.6)             |
| Sex Activity (n=266)          |                       |                       |                       |                       |
| Yes                           | 38(22.6)              | 66(39.3)              | 64(38.1)              | 168(63.2)             |
| No                            | 29(29.6)              | 30(30.6)              | 39(39.8)              | 98(36.8)              |
| Multiple Sex Partners (n=168) |                       |                       |                       |                       |
| Yes                           | 7(14.3)               | 23(46.9)              | 19(38.8)              | 49(29.2)              |
| No                            | 31(26.1)              | 43(36.1)              | 45(37.8)              | 119(70.8)             |
| Condom Use (n=168)            |                       |                       |                       |                       |
| Yes                           | 24(25.3)              | 37(38.9)              | 34(35.8)              | 95(56.5)              |
| No                            | 14(19.2)              | 29(39.7)              | 30(41.1)              | 73(43.5)              |
| Sex for Drugs (n=117)         |                       |                       |                       |                       |
| Yes                           | 3(17.6)               | 8(47.1)               | 6(35.3)               | 17(14.5)              |
| No                            | 18(18.0)              | 32(32.0)              | 50(50.0)              | 100(85.5)             |

3 <sup>a</sup> calculated by row, <sup>b</sup> calculated by column.

4

5

## STROBE Statement—checklist of items that should be included in reports of observational studies

|                              | Item No | Recommendation                                                                                                                                                                                                                                                                                                                                                                                                                                                                                                                                                                                                                                                                                                                                                   |
|------------------------------|---------|------------------------------------------------------------------------------------------------------------------------------------------------------------------------------------------------------------------------------------------------------------------------------------------------------------------------------------------------------------------------------------------------------------------------------------------------------------------------------------------------------------------------------------------------------------------------------------------------------------------------------------------------------------------------------------------------------------------------------------------------------------------|
| <b>Title and abstract</b>    | 1       | (a) Indicate the study's design with a commonly used term in the title or the abstract<br><a href="#">In the title</a><br>(b) Provide in the abstract an informative and balanced summary of what was done and what was found<br><a href="#">Line 7-8,page 2; line 9-16,page 2</a>                                                                                                                                                                                                                                                                                                                                                                                                                                                                               |
| <b>Introduction</b>          |         |                                                                                                                                                                                                                                                                                                                                                                                                                                                                                                                                                                                                                                                                                                                                                                  |
| Background/rationale         | 2       | Explain the scientific background and rationale for the investigation being reported<br><a href="#">Line 19-22, page 4; line 1-4, page 5</a>                                                                                                                                                                                                                                                                                                                                                                                                                                                                                                                                                                                                                     |
| Objectives                   | 3       | State specific objectives, including any prespecified hypotheses<br><a href="#">Line 5-8, page 5</a>                                                                                                                                                                                                                                                                                                                                                                                                                                                                                                                                                                                                                                                             |
| <b>Methods</b>               |         |                                                                                                                                                                                                                                                                                                                                                                                                                                                                                                                                                                                                                                                                                                                                                                  |
| Study design                 | 4       | Present key elements of study design early in the paper<br><a href="#">Line 11-15,page 6</a>                                                                                                                                                                                                                                                                                                                                                                                                                                                                                                                                                                                                                                                                     |
| Setting                      | 5       | Describe the setting, locations, and relevant dates, including periods of recruitment, exposure, follow-up, and data collection<br><a href="#">Line 11-21,page 6</a>                                                                                                                                                                                                                                                                                                                                                                                                                                                                                                                                                                                             |
| Participants                 | 6       | (a) <i>Cohort study</i> —Give the eligibility criteria, and the sources and methods of selection of participants. Describe methods of follow-up<br><a href="#">Line 18-21, page 6; line 1-3,page 7</a><br><i>Case-control study</i> —Give the eligibility criteria, and the sources and methods of case ascertainment and control selection. Give the rationale for the choice of cases and controls<br><i>Cross-sectional study</i> —Give the eligibility criteria, and the sources and methods of selection of participants<br>(b) <i>Cohort study</i> —For matched studies, give matching criteria and number of exposed and unexposed<br>-----<br><i>Case-control study</i> —For matched studies, give matching criteria and the number of controls per case |
| Variables                    | 7       | Clearly define all outcomes, exposures, predictors, potential confounders, and effect modifiers. Give diagnostic criteria, if applicable<br><a href="#">line 4-22,page 7;line 1-15, page 8</a>                                                                                                                                                                                                                                                                                                                                                                                                                                                                                                                                                                   |
| Data sources/<br>measurement | 8*      | For each variable of interest, give sources of data and details of methods of assessment (measurement). Describe comparability of assessment methods if there is more than one group<br><a href="#">line 4-22,page 7;line 1-15, page 8</a>                                                                                                                                                                                                                                                                                                                                                                                                                                                                                                                       |
| Bias                         | 9       | Describe any efforts to address potential sources of bias<br><a href="#">Line 14-17,page 7; line 1-2,page 8</a>                                                                                                                                                                                                                                                                                                                                                                                                                                                                                                                                                                                                                                                  |
| Study size                   | 10      | Explain how the study size was arrived at<br><a href="#">Line 15-17, page 6</a>                                                                                                                                                                                                                                                                                                                                                                                                                                                                                                                                                                                                                                                                                  |
| Quantitative variables       | 11      | Explain how quantitative variables were handled in the analyses. If applicable, describe which groupings were chosen and why<br><a href="#">Line 19-21,page 7; line 1-6,page 8</a>                                                                                                                                                                                                                                                                                                                                                                                                                                                                                                                                                                               |



|    |                     |                                                                                            |
|----|---------------------|--------------------------------------------------------------------------------------------|
| 1  |                     |                                                                                            |
| 2  |                     |                                                                                            |
| 3  | Statistical methods | 12                                                                                         |
| 4  |                     | (a) Describe all statistical methods, including those used to control for confounding      |
| 5  |                     | <a href="#">Line 16-22, page 8</a>                                                         |
| 6  |                     | (b) Describe any methods used to examine subgroups and interactions                        |
| 7  |                     | (c) Explain how missing data were addressed                                                |
| 8  |                     | (d) <i>Cohort study</i> —If applicable, explain how loss to follow-up was addressed        |
| 9  |                     | <i>Case-control study</i> —If applicable, explain how matching of cases and controls was   |
| 10 |                     | addressed                                                                                  |
| 11 |                     | <i>Cross-sectional study</i> —If applicable, describe analytical methods taking account of |
| 12 |                     | sampling strategy                                                                          |
| 13 |                     | (e) Describe any sensitivity analyses                                                      |
| 14 |                     |                                                                                            |

Continued on next page

For peer review only

**Results**

|                  |     |                                                                                                                                                                                                                                                     |
|------------------|-----|-----------------------------------------------------------------------------------------------------------------------------------------------------------------------------------------------------------------------------------------------------|
| Participants     | 13* | (a) Report numbers of individuals at each stage of study—eg numbers potentially eligible, examined for eligibility, confirmed eligible, included in the study, completing follow-up, and analysed<br><a href="#">Line 15-17, page 6</a>             |
|                  |     | (b) Give reasons for non-participation at each stage                                                                                                                                                                                                |
|                  |     | (c) Consider use of a flow diagram                                                                                                                                                                                                                  |
| Descriptive data | 14* | (a) Give characteristics of study participants (eg demographic, clinical, social) and information on exposures and potential confounders<br><a href="#">Table 1, line 2-12, page 9</a>                                                              |
|                  |     | (b) Indicate number of participants with missing data for each variable of interest<br><a href="#">Table 1-5</a>                                                                                                                                    |
|                  |     | (c) <i>Cohort study</i> —Summarise follow-up time (eg, average and total amount)<br><a href="#">Line 22, page 6; Line 1-3, page 7</a>                                                                                                               |
| Outcome data     | 15* | <i>Cohort study</i> —Report numbers of outcome events or summary measures over time<br><a href="#">line 21-22, page 9</a>                                                                                                                           |
|                  |     | <i>Case-control study</i> —Report numbers in each exposure category, or summary measures of exposure                                                                                                                                                |
|                  |     | <i>Cross-sectional study</i> —Report numbers of outcome events or summary measures                                                                                                                                                                  |
| Main results     | 16  | (a) Give unadjusted estimates and, if applicable, confounder-adjusted estimates and their precision (eg, 95% confidence interval). Make clear which confounders were adjusted for and why they were included<br><a href="#">Table 4, page 26-27</a> |
|                  |     | (b) Report category boundaries when continuous variables were categorized<br><a href="#">Table 1, page 22-23</a>                                                                                                                                    |
|                  |     | (c) If relevant, consider translating estimates of relative risk into absolute risk for a meaningful time period                                                                                                                                    |
| Other analyses   | 17  | Report other analyses done—eg analyses of subgroups and interactions, and sensitivity analyses<br><a href="#">Line 10-15, page 10</a>                                                                                                               |

**Discussion**

|                  |    |                                                                                                                                                                                                                                                                                                 |
|------------------|----|-------------------------------------------------------------------------------------------------------------------------------------------------------------------------------------------------------------------------------------------------------------------------------------------------|
| Key results      | 18 | Summarise key results with reference to study objectives<br><a href="#">Line 7-8, page 11; line 12, page 11; line 1-2, page 12; line 6-7 page 12; line 16-18, page 12; line 22, page 12</a>                                                                                                     |
| Limitations      | 19 | Discuss limitations of the study, taking into account sources of potential bias or imprecision. Discuss both direction and magnitude of any potential bias<br><a href="#">Line 17-22, page 13; line 1-5, page 14</a>                                                                            |
| Interpretation   | 20 | Give a cautious overall interpretation of results considering objectives, limitations, multiplicity of analyses, results from similar studies, and other relevant evidence<br><a href="#">Line 9-11, page 11; line 13-19, page 11; line 2-4, page 12; line 6-10, page 12; line 1-6, page 13</a> |
| Generalisability | 21 | Discuss the generalisability (external validity) of the study results<br><a href="#">Line 6-12, page 14</a>                                                                                                                                                                                     |

**Other information**

|         |    |                                                                                                                                                                                                    |
|---------|----|----------------------------------------------------------------------------------------------------------------------------------------------------------------------------------------------------|
| Funding | 22 | Give the source of funding and the role of the funders for the present study and, if applicable, for the original study on which the present article is based<br><a href="#">Line 1-5, page 15</a> |
|---------|----|----------------------------------------------------------------------------------------------------------------------------------------------------------------------------------------------------|

1  
2  
3 \*Give information separately for cases and controls in case-control studies and, if applicable, for exposed and  
4 unexposed groups in cohort and cross-sectional studies.  
5  
6

7 **Note:** An Explanation and Elaboration article discusses each checklist item and gives methodological background and  
8 published examples of transparent reporting. The STROBE checklist is best used in conjunction with this article (freely  
9 available on the Web sites of PLoS Medicine at <http://www.plosmedicine.org/>, Annals of Internal Medicine at  
10 <http://www.annals.org/>, and Epidemiology at <http://www.epidem.com/>). Information on the STROBE Initiative is  
11 available at [www.strobe-statement.org](http://www.strobe-statement.org).  
12  
13  
14  
15  
16  
17  
18  
19  
20  
21  
22  
23  
24  
25  
26  
27  
28  
29  
30  
31  
32  
33  
34  
35  
36  
37  
38  
39  
40  
41  
42  
43  
44  
45  
46  
47  
48  
49  
50  
51  
52  
53  
54  
55  
56  
57  
58  
59  
60

For peer review only

# BMJ Open

## Positive Percentages of Urine Morphine Tests among Methadone Maintenance Treatment Clients with HIV/AIDS: A 12-Month Follow-up Study in Guangdong Province, China

|                                 |                                                                                                                                                                                                                                                                                                                                                                                                                                                                                                                                                                                                                                                                                                                                                                                                                                                                                       |
|---------------------------------|---------------------------------------------------------------------------------------------------------------------------------------------------------------------------------------------------------------------------------------------------------------------------------------------------------------------------------------------------------------------------------------------------------------------------------------------------------------------------------------------------------------------------------------------------------------------------------------------------------------------------------------------------------------------------------------------------------------------------------------------------------------------------------------------------------------------------------------------------------------------------------------|
| Journal:                        | <i>BMJ Open</i>                                                                                                                                                                                                                                                                                                                                                                                                                                                                                                                                                                                                                                                                                                                                                                                                                                                                       |
| Manuscript ID                   | bmjopen-2016-014237.R3                                                                                                                                                                                                                                                                                                                                                                                                                                                                                                                                                                                                                                                                                                                                                                                                                                                                |
| Article Type:                   | Research                                                                                                                                                                                                                                                                                                                                                                                                                                                                                                                                                                                                                                                                                                                                                                                                                                                                              |
| Date Submitted by the Author:   | 10-Mar-2017                                                                                                                                                                                                                                                                                                                                                                                                                                                                                                                                                                                                                                                                                                                                                                                                                                                                           |
| Complete List of Authors:       | Luo, Xiaofeng; Sun Yat-Sen University, Faculty of Medical Statistics and Epidemiology, School of Public Health;Sun Yat-sen Center for Migrant Health Policy<br>Gong, Xiao; Sun Yat-Sen University, Faculty of Medical Statistics and Epidemiology, School of Public Health;Sun Yat-sen Center for Migrant Health Policy<br>Zhao, Peizhen; Guangdong Provincial Center for Skin Disease and STI Control<br>Zou, Xia; Sun Yat-Sen University, Faculty of Medical Statistics and Epidemiology, School of Public Health;Sun Yat-sen Center for Migrant Health Policy<br>Chen, Wen; Sun Yat-Sen University, Faculty of Medical Statistics and Epidemiology, School of Public Health;Sun Yat-sen Center for Migrant Health Policy<br>Ling, Li; Sun Yat-sen University, Faculty of Medical Statistics and Epidemiology, School of Public Health;Sun Yat-sen Center for Migrant Health Policy |
| <b>Primary Subject Heading</b>: | Addiction                                                                                                                                                                                                                                                                                                                                                                                                                                                                                                                                                                                                                                                                                                                                                                                                                                                                             |
| Secondary Subject Heading:      | Epidemiology, HIV/AIDS                                                                                                                                                                                                                                                                                                                                                                                                                                                                                                                                                                                                                                                                                                                                                                                                                                                                |
| Keywords:                       | Heroin Use, Methadone Maintenance Treatment (MMT), HIV, China                                                                                                                                                                                                                                                                                                                                                                                                                                                                                                                                                                                                                                                                                                                                                                                                                         |
|                                 |                                                                                                                                                                                                                                                                                                                                                                                                                                                                                                                                                                                                                                                                                                                                                                                                                                                                                       |

SCHOLARONE™  
Manuscripts

1  
2  
3  
4 **1 Positive Percentages of Urine Morphine Tests among Methadone Maintenance Treatment Clients**  
5  
6 **2 with HIV/AIDS: A 12-Month Follow-up Study in Guangdong Province, China**  
7

8  
9 Xiaofeng Luo<sup>1,2</sup>, Xiao Gong<sup>1,2</sup>, Peizhen Zhao<sup>3</sup>, Xia Zou<sup>1,2</sup>, Wen Chen<sup>1,2</sup>, Li Ling<sup>1,2\*</sup>  
10

11 <sup>1</sup> Faculty of Medical Statistics and Epidemiology, School of Public Health, Sun Yat-sen University, 74  
12  
13 Zhongshan Road II, Guangzhou 510080, China.  
14

15  
16 <sup>2</sup> Sun Yat-sen Center for Migrant Health Policy, Sun Yat-sen University, 74 Zhongshan Road II,  
17  
18 Guangzhou 510080, China.  
19

20  
21 <sup>3</sup> Guangdong Provincial Center for Skin Disease and STI Control, No. 2 Lujing Road, Guangzhou  
22  
23 510095, China.  
24

25  
26  
27  
28  
29 **\*Correspondence:** Li Ling, PhD, Professor. Faculty of Medical Statistics and Epidemiology, School of  
30  
31 Public Health, Sun Yat-sen University, 74 Zhongshan Road II, Guangzhou 510080, China; Sun Yat-sen  
32  
33 Center for Migrant Health Policy, Sun Yat-sen University, 74 Zhongshan Road II, Guangzhou 510080,  
34  
35 China. Email: lingli@mail.sysu.edu.cn; Tel/Fax: +86-20-87333319.  
36  
37  
38

39 **Running head:** Heroin use among MMT clients with HIV/AIDS in Guangdong  
40

41  
42  
43  
44 **Word Count:** 2,866 for main text including sub-headings, 240 for abstract  
45  
46  
47  
48  
49  
50  
51  
52  
53  
54  
55  
56  
57  
58  
59  
60

1  
2  
3  
4 **Abstract**

5  
6 **Objective:** We aimed to assess the positive percentages of urine morphine tests and correlates among  
7  
8  
9 methadone maintenance treatment (MMT) clients with HIV/AIDS in Guangdong, China.

10  
11 **Setting:** Fourteen MMT clinics located in 9 cities of Guangdong were chosen as study sites.

12  
13  
14 **Participants:** In this study, we reviewed 293 clients with opioid dependence, HIV seropositive, 18  
15  
16 years or older, providing informed consent and having at least 10 records of urine morphine tests  
17  
18 during the study period.

19  
20  
21 **Primary and secondary outcome measures:** The positive percentages of urine morphine tests were  
22  
23  
24 calculated and underlying predictors were estimated.

25  
26  
27 **Results:** The highest positive percentage (95.9%) was observed in the first month. After excluding the  
28  
29 highest percentage in the first month, the average positive percentage was 40.9% for month 2 to month  
30  
31 12. Positive percentages of urine morphine tests that <20%, 20%-60% and >80% were 25.4%, 36.1%  
32  
33 and 38.5% respectively. Lower percentages of continued heroin use were associated with being young  
34  
35 (OR<sub>≤30</sub>=0.31, 95%CI: 0.12-0.78; OR<sub>31+</sub>=0.44, 95%CI: 0.20-1.00), and financial sources depending on  
36  
37 family or friends (OR=0.55, 95%CI: 0.32-0.93). Higher percentages of continued heroin use were  
38  
39 associated with being unemployed (OR=1.99, 95%CI: 1.13-3.49) and poorer MMT attendance  
40  
41 (OR<sub><20%</sub>=3.60, 95%CI: 1.55-8.33; OR<sub>20%</sub>=2.80, 95%CI: 1.48-5.33).  
42  
43  
44  
45

46  
47 **Conclusions:** High positive percentages of urine morphine tests remain prevalent among MMT clients  
48  
49 with HIV/AIDS in Guangdong. The present findings have implications for taking effective measures to  
50  
51 facilitate attendance in order to decrease heroin use and ultimately improve the effectiveness among  
52  
53 these sub-group MMT clients.  
54  
55

56  
57 **Key words:** Heroin Use; Methadone Maintenance Treatment (MMT); HIV; China  
58  
59  
60

1  
2  
3  
4 **1 Strengths and Limitations**  
5

- 6 1. This is a long-term consecutive study specifically designed to examine concurrent heroin use  
7  
8 among HIV-positive MMT clients in China.  
9  
10  
11 2. This study mainly focused on positive percentages of urine morphine tests among HIV-positive  
12  
13 MMT clients in China.  
14  
15  
16 3. Self-reported data are subject to recall bias or deliberate concealment.  
17  
18  
19 4. China is experiencing a significant increase in the use of new drugs, but this study did not consider  
20  
21 it.  
22  
23  
24 5. We only examined the percentages of heroin use during the first 12 months after receiving MMT  
25  
26 due to the limited sample size and high drop-out.  
27  
28

29  
30  
31  
32  
33  
34  
35  
36  
37  
38  
39  
40  
41  
42  
43  
44  
45  
46  
47  
48  
49  
50  
51  
52  
53  
54  
55  
56  
57  
58  
59  
60

## 1 Introduction

2 In China, illicit drug use has increased dramatically since the 1980s [1]. There were cumulatively  
3 registered 2.95 million drug users by the end of 2014 and 480,000 newly registrations in 2014  
4 nationwide [2]. Although China recently is experiencing a significant increase in the use of new-type  
5 drugs, heroin still remains the major illicit used drug among drug users [2]. The earliest HIV case was  
6 identified among intravenous drug users (IDUs) in Southern Yunnan province in 1989 [3]. The early  
7 spread of HIV epidemics in China mainly attributed to intravenous drug use (IDU) [4]. As of 2013,  
8 437,000 people lived with HIV/AIDS in China (including 263,000 people living with HIV and 174,000  
9 AIDS patients), accounting for 0.033% of the total population in China; and sentinel surveillance data  
10 showed the HIV/AIDS prevalence was 6.3% among IDUs [5].

11 Globally, methadone maintenance treatment (MMT) is the most widely used pharmacological  
12 treatment for opioid dependence. China has operated MMT program as a national strategy to combat  
13 the joint threat of drug use and HIV/AIDS since 2004 [6]. For decades, MMT program has achieved its  
14 crucial effectiveness not only in reducing heroin use [7] but also in preventing the spread of HIV [8, 9].  
15 Meanwhile, studies have shown that MMT is beneficial in reducing drug-related criminal activities [10]  
16 and drug-related mortality [11]. In addition, for the HIV-positive individuals, MMT could facilitate the  
17 adherence to antiretroviral therapy [12]. By the end of April 2015, China has 767 MMT clinics in 28  
18 provinces across the nation, serving nearly 190,000 clients [13].

19 However, many clients did not completely abstain from heroin and exhibited continued heroin use  
20 while in MMT [14-17]. Continued heroin use could lead to negative MMT treatment outcomes among  
21 clients [18]. Heroin addicts still contribute a high mortality even with MMT [19]. Overdosed drug  
22 intake remains the most common cause of death among MMT clients [20]. After a period of abstinence



1 via MMT, the heroin tolerance of clients would decrease, thus overdosed intake may become more  
2 prevalent [21, 22]. Individuals with HIV/AIDS are a special group among MMT clients. A  
3 meta-analysis showed that HIV seropositivity would increase the mortality risk of overdose [23]. In  
4 addition, continued heroin use would decrease the retention rate among MMT clients with HIV/AIDS  
5 [24]. Therefore, heroin use deserves more attention among MMT clients with HIV/AIDS. To date,  
6 limited data are available on heroin use among MMT clients with HIV/AIDS in China [14, 25] and  
7 about the higher percentages of heroin use is even less. To fill this gap, we applied this study is to  
8 examine the higher percentages of heroin use among MMT clients with HIV/AIDS in Guangdong.  
9

## 1 **Methods**

### 2 **Ethics Statement**

3 The Institutional Review Board (IRB) of the School of Public Health (Sun Yat-sen University,  
4 Guangzhou, China) reviewed and approved the study protocol. All study participants were asked to  
5 provide written informed consent.

### 6 **Study Site and Participants**

7 Guangdong, located in the Southern coast of China, is one of the most developed provinces.  
8 Meanwhile, Guangdong also is one of the HIV/AIDS and drug epidemic areas because it has  
9 cumulative reported 48,718 HIV-positive cases, ranking fifth among provinces in China as of October  
10 2014 [26], in addition, it has one-sixth of totally registered drug users in China [27].

11 This study was conducted in 14 MMT clinics located in 9 cities of Guangdong (According to  
12 whether the 1-year retention rate is above or below 50%, the 61 MMT clinics were divided into two  
13 groups, and seven clinics were randomly selected from each group [28]). We got permission and  
14 authorization to use and retrieve part of data for the selected MMT clinics from the Chinese National  
15 MMT Program data system. In this study, participants were eligible if they were (1) diagnosed with  
16 opioid dependence according to the International Classification of Diseases (10th Revision); (2) 18  
17 years or older; (3) tested to be HIV-positive at entry; (4) able to provide informed consent; and (5) had  
18 at least 10 records of urine morphine tests.

19 In this study, “drop-out” was defined as a participant failing to continue MMT for 14 consecutive  
20 days [28]. Based on whether drop-out happened before 12 months post-MMT initiation, the study  
21 period could be classified into two categories: one was defined as the duration between enrollment and  
22 dropout, the other was defined as the duration between enrolment and the end of the first 12 months.

## 1 **Measures**

### 2 ***Self-reported Risk Behaviors***

3 At admission, as well as 6<sup>th</sup> and 12<sup>th</sup> month respectively, each participant was requested to  
4 complete a questionnaire covering demographic characteristics, drug use history including injecting  
5 drug and sharing needle/equipment, sexual activity history, and condom use status.

6 A client was regarded as having corresponding risk behaviors during the study period if he/she  
7 reported those behaviors either 6<sup>th</sup> or 12<sup>th</sup> interview (i.e. drug use behaviors including injecting drug  
8 and sharing needle/equipment; and risk sexual activities including, multiple sex partner, inconsistent  
9 condom use and sex trade for drugs.).

### 10 ***Methadone Maintenance Doses and Attendance***

11 In China, to insure MMT security, clients are forbidden to take Methadone outside the clinic. Once  
12 enrolled in MMT, the clients must go to the clinic at consultation hours daily to take the prescribed  
13 doses of Methadone under the supervision of clinic staff, and the daily doses and date were routinely  
14 recorded in the national unified MMT management system. The treatment cost was RMB 10 Yuan  
15 (USD: 1.5 Dollar) per day regardless of the client' intake doses and times.

16 Average maintenance dose was obtained via computing the mean of daily prescribed doses (The  
17 doses of the first month were excluded because the first month of methadone maintenance treatment is  
18 to give doctor time to adjust appropriate dose for a client. Usually the dose starts from small, 20 mg to  
19 40 mg per day, and it will gradually increase slowly to certain amount.).

20 The percentage of MMT attendance was calculated based on proportion of days that a client  
21 actually received the doses over the study period.

### 22 ***Positive Percentages of Urine Morphine Tests during the Study Period***

1  
2  
3  
4 1 A positive result of urine morphine test generally means heroin use by the clients within a few  
5  
6 2 days. Urine-based morphine tests were monthly performed on a random day during the study period.

7  
8  
9 3 As mentioned above, there exists a MMT dose adjustment stage for a new enrolled client. During  
10  
11 4 the adjustment stage, most clients often use opioid to adjust themselves to methadone maintenance  
12  
13 5 treatment. Therefore, the result of urine morphine test in the first month was excluded from calculation  
14  
15 6 of heroin use and percentages in our study.

16  
17  
18  
19 7 A client was recognized as a heroin user as long as any urine morphine test result was positive  
20  
21 8 within 12 months.

22  
23  
24 9 The percentage of heroin use was calculated based on the number of positive urine morphine test  
25  
26 10 results and the number of total urine test times within 12 months.

27  
28  
29 11 Based on the urine morphine tests, the clients were currently grouped as “urine morphine (+)” and  
30  
31 12 “urine morphine (-)”. Additionally, the positive percentages were grouped as <20%, 20-60% and >60%  
32  
33 13 based on the data distribution.

#### 34 35 36 14 ***HIV and Urine Morphine Tests***

37  
38  
39 15 Except for those who were already confirmed as HIV-positive prior this study, each client was  
40  
41 16 invited to receive HIV testing. HIV infection status was screened using an enzyme-linked  
42  
43 17 immunosorbent assay (ELISA) technique (Beijing BGI-GBI Biotech Co., Ltd, Beijing, China). Positive  
44  
45 18 blood specimens for HIV were confirmed using a Western blot assay (Abbott, MP Biomedicals, LLC,  
46  
47 19 Singapore) by the local Centers for Disease Control (CDC). According to related national guidelines,  
48  
49 20 pre- and post- test counseling services were provided.

50  
51  
52  
53  
54 21 Random urine morphine status was screened using a Morphine Diagnostic Kit (Colloidal Gold)  
55  
56 22 technique (ABON Biopharm Co., Ltd, Hangzhou, China).

1  
2  
3  
4 **1 Statistical Analysis**  
5

6 Statistical analyses were performed using SPSS 17.0 for Windows (SPSS Inc., Chicago).  
7

8  
9 3 Categorical variables were described with percentages. Multivariate ordinal logistic regression analysis

10  
11 4 was conducted to predict higher percentages of heroin use from baseline information including

12  
13 5 demographic, drug use and multiple sex partners, as well as average maintenance dose and percentages

14  
15 6 of MMT attendance during the study period among the MMT clients with HIV/AIDS. Any  $p < 0.05$  was

16  
17 7 considered to be statistically significant.  
18  
19  
20  
21  
22  
23  
24  
25  
26  
27  
28  
29  
30  
31  
32  
33  
34  
35  
36  
37  
38  
39  
40  
41  
42  
43  
44  
45  
46  
47  
48  
49  
50  
51  
52  
53  
54  
55  
56  
57  
58  
59  
60

## 1 Results

### 2 *Study Participants and Demographic Characteristics*

3 Among the 293 participants, 16.0% were elder than 40; 91.5% were males; 99.3% were ethnic  
4 Han (China's predominant ethnic group), 54.3% were never married; 21.8% just had elementary or  
5 lower education; 68.9% were unemployed and 64.2% obtained financial sources from their family or  
6 friends (Table 1).

### 7 *Heroin Use and Multiple Sex Partner at Baseline*

8 Table 1 presents baseline information on heroin use. Of the participants, 77.8% had used heroin  
9 for more than 10 years; 59.4% participants used heroin at least 3 times daily on average; the vast  
10 majority (98.6%) abused powdered heroin and 99.0% ever administered drug by injection. Among the  
11 IDUs, 56.6% ever shared intravenous needles. Only 13.7% never met the peer users.

12 Of these participants, 21.5% had had sexual activity with multiple sex partner (Table 1).

### 13 *Average Maintenance Doses and Attendance*

14 Among all participants, 46.8% had received doses below 60 ml and the average maintenance dose  
15 was (67.5 ± 28.7) ml.

16 In addition, 10.6% participants' MMT attendance percentages were less than 20% and only 40.6%  
17 were over 80% (Table 1).

### 18 *Positive Percentages of Urine Morphine Tests during the Study Period*

19 Between 2006 and 2012, there were 3471 urine morphine tests performed and 1580 were positive  
20 (45.5%). The highest positive percentage was observed in the first month (95.9%), then it remained as  
21 high as between 39.3% and 53.6% for month 2 to month 12. After excluding the highest percentage in  
22 the first month, the average positive percentage was 40.9% for month 2 to month 12. The median

1 positive percentage of urine morphine tests was 48.6% for 2006, 48.7% for 2007, 44.0% for 2008, 41.2%  
2 for 2009, 43.3% for 2010, 43.4% for 2011 and 22.5% for 2013, respectively (Table 2). Among the 268  
3 urine morphine (+) clients, positive percentages of urine morphine tests that <20%, 20%-60% and >60%  
4 were 25.4%, 36.1% and 38.5% respectively (Table 3).

5 After adjusted for potential confounding variables listed in the table, multiple ordinal logistic  
6 regression analysis indicated that a higher percentage of heroin use was independently associated with  
7 age, employment status, mainly financial sources and percentages of MMT attendance. Participants  
8 who were younger ( $OR_{\leq 30}=0.31$ , 95%CI: 0.2-0.78;  $OR_{31-35}=0.44$ , 95%CI: 0.20-1.00), and got money  
9 from family or friends ( $OR=0.55$ , 95%CI: 0.32-0.93) were more likely to be tested as having lower  
10 percentages of heroin use; and those who were unemployed ( $OR=1.99$ , 95%CI: 1.13-3.49) and had  
11 poor MMT attendance percentages ( $OR_{<20}=3.60$ , 95%CI: 1.55-8.33;  $OR_{20-}=2.80$ , 95%CI: 1.48-5.33)  
12 were more likely to have higher percentages of heroin use (Table 4).

### 13 ***Self-reported High Risk Behaviors during the Study Period***

14 Among the clients with urine morphine (+), 99.3% (266 of 268) and 88.1% (236 of 268)  
15 completed the 6<sup>th</sup> and 12<sup>th</sup> month follow-up interviews respectively. Of the 266 clients completed at  
16 least one follow-up interview, 62.8% ever used drugs, 85.0% used intravenous drugs, and 25.4% ever  
17 shared intravenous needles; 63.2% were sexual active, 29.2% had sex with multiple sex partners, and  
18 43.5% never used condom during the sexual course. Also, 14.5% traded sex for drugs (Table 5).

19

## 1 Discussion

2 Heroin use among MMT clients has been reported substantially worldwide [15, 16]. HIV-positive  
3 drug users are a unique subgroup for playing a “dual bridge” role in HIV transmission. This study is an  
4 extension of our previous study [25]. Our results were based on random, long-term and consecutive  
5 urine tests, which was blind to clients in case those continued heroin users deliberately avoid the test  
6 time.

7 Findings from the current analysis revealed that there were 91.5% participants had used heroin at  
8 least once during the study period, which was higher than that (75%) of general MMT clients reported  
9 by our prior study [25]. Findings also showed that 14.2% almost always used heroin. Given that  
10 continued heroin use might lead to adverse health outcomes [20, 23] and high drop-out rate [24] among  
11 MMT clients with HIV/AIDS, targeted interventions and control programs are urgently needed for this  
12 subgroup.

13 Compared to the young participants, the elders showed greater likelihood of continued heroin use.  
14 Many elders had turned from clinical latency stage to AIDS stage and they may experience more pain  
15 and psychological symptoms [29, 30]. Studies had shown that depressive symptoms are common  
16 among people with HIV infection [31, 32]. However, MMT improvements in depressive symptoms and  
17 the physical domain of QOL (quality of life) among HIV-positive heroin users were poorer than in  
18 those without HIV infection [33]. Also, most of them had lost the courage and confidence to live on.  
19 Culturally, stigma and discrimination towards drug use and HIV/AIDS might seriously impede the  
20 MMT attendance [34]. In addition, inappropriate perceptions of MMT should not be neglected [35].

21 Previous research has documented that the clients who were employed were more likely to use  
22 heroin during the treatment period [36]. In contrast, we found that the unemployed had more likelihood



1  
2  
3  
4 1 with concurrent heroin use. This was possibly due to the unemployed (1) lacked social support; (2) had  
5  
6 2 more time to communicate with former drug taking peers. There was a big difference between the  
7  
8 3 employed and the unemployed not only in terms of sociodemographic factors but also the family tie,  
9  
10 4 which in turn influenced concurrent heroin use [25, 37].  
11  
12

13  
14 5 Generally, high drug fee generally made the drug users can't afford it. In our study, the clients  
15  
16 6 whose financial sources depend on family or friends were less likely to use heroin. Money from family  
17  
18 7 or friends is meant to support basic life and is far not enough to meet drug expenditure. Furthermore,  
19  
20 8 drug use and MMT is regarded as a family issue in China, and family or friends' support might  
21  
22 9 potentially supervise and encourage treatment participation and compliance [25, 37].  
23  
24

25  
26 10 There has been controversy over whether higher Methadone doses could decrease heroin use  
27  
28 11 among MMT clients. Studies showed an appropriate MMT dose is the most effective in suppressing  
29  
30 12 heroin use in treatment [18, 38]. There were also further research suggesting that an adequate dose of  
31  
32 13 Methadone (e.g., 80-120 mgs/day) would significantly reduce heroin use among clients within the first  
33  
34 14 two months of treatment and eventually either eliminated or significantly curtailed with time in  
35  
36 15 treatment [39, 40]. However, other studies revealed there was no correlation between Methadone doses  
37  
38 16 and heroin use in treatment [41, 42]. The Methadone dose was  $\geq 60$  mg/day recommended by US  
39  
40 17 National Institutes of Health [43], and should be higher for HIV-positive individuals [44]. We found  
41  
42 18 46.8% participants' doses were less than 60 mg/day. Compared to those with higher doses, we did not  
43  
44 19 find the clients with lower doses were more likely to use heroin. Given the small sample size and  
45  
46 20 short-term observation, further large sample size and stratified dose research are needed.  
47  
48  
49  
50  
51  
52

53  
54 21 Without exception, treatment effectiveness relies upon sufficient levels of medication adherence.  
55  
56 22 MMT requires long-term or even life-long intake of Methadone at an adequate dose on a daily basis  
57  
58  
59  
60

1 [45]. We found that the lower attendance meant the higher percentage of heroin use. This was  
2 consistent with our prior study [25]. Continued heroin users attended MMT programs irregularly and  
3 the attendance significantly declined with the duration that they retained in treatment program [46].  
4 Poorer attendance seeded continued heroin use. In addition, misconceptions might predict poor  
5 adherence among newly admitted MMT clients [47]. So, future research might need to develop and/or  
6 integrate other necessary interventions to encourage client adherence to the treatment program.

7 HIV-positive drug users have been regarded as a “dual risk” subgroup. They transmit HIV via  
8 either sharing needles or having unprotected sexual intercourse with partners. Currently, sexual  
9 transmission is the most prevalent spread pattern of HIV/AIDS in China [5]. Among the participants  
10 who finished at least once interview, 25.4% ever shared needle; 29.2% ever had sex with multiple  
11 partners; 43.5% never used condom and 14.5% had sex for drugs during the study period. Considering  
12 the potential bridge role of those with dual risk behaviors in transmitting HIV to others, research on the  
13 interaction of HIV-positive MMT clients and risk behaviors should be given high priority. Data showed  
14 that changing unsafe drug use behaviors was more effective than changing unsafe sexual behaviors [17].  
15 In future treatment procedures, physicians and nurses should play an active role in educating clients  
16 about safe sex and encourage clients to use condoms.

17 This study is subject to certain limitations. Firstly, self-reported data are subject to recall bias or  
18 deliberate concealment. Secondly, China is experiencing a significant increase in the use of new drugs  
19 [2], but this study did not consider it. In addition, we failed to obtain the ART (anti-retroviral treatment)  
20 information, and future studies should be extended to analyze ART as predictor variable to continued  
21 heroin use. Thirdly, we only examined the percentages of heroin use during the first 12 months after  
22 receiving MMT, and did not take 12+ months into consideration due to the limited sample size and

1  
2  
3  
4 1 high drop-out.  
5

6 2 In summary, findings from this study provide important implications for future MMT programs  
7  
8 3 targeting continued heroin use among HIV-positive clients. Concretely, first, continuous and efficient  
9  
10 4 MMT consulting and health education interventions need to be conducted for reducing continued  
11  
12 5 heroin use. Interventions involving family members in supervision of participation and compliance  
13  
14 6 should be reinforced. Second, attendance are crucial components affecting MMT<sup>7</sup> outcomes, so how to  
15  
16 7 improve sufficient attendance have become issues of great urgency.  
17  
18  
19  
20

21 8

22  
23  
24 9

25  
26 10  
27  
28  
29  
30  
31  
32  
33  
34  
35  
36  
37  
38  
39  
40  
41  
42  
43  
44  
45  
46  
47  
48  
49  
50  
51  
52  
53  
54  
55  
56  
57  
58  
59  
60

1  
2  
3  
4  
5  
6  
7  
8  
9  
10  
11  
12  
13  
14  
15  
16  
17  
18  
19  
20  
21  
22  
23  
24  
25  
26  
27  
28  
29  
30  
31  
32  
33  
34  
35  
36  
37  
38  
39  
40  
41  
42  
43  
44  
45  
46  
47  
48  
49  
50  
51  
52  
53  
54  
55  
56  
57  
58  
59  
60

## 1 **Role of Funding Source**

2 This study was supported by the National Natural Science Foundation of China (grant no.  
3 71173245 and 81473065 to L.L.) and China Medical Board (12-111 to L.L.).The funding agencies play  
4 no role in the study design, data collection, and data analysis, interpretation of study results and writing  
5 of the manuscript.

## 6 **Contributors**

7 XL designed the study, performed data analysis and wrote the draft manuscript. XG and PZ  
8 performed data analysis. XZ and WC collected the data. LL supervised the study. All authors  
9 contributed to the interpretation of the data and approved the final version for submission.

## 10 **Conflict of Interest**

11 The authors declare no conflicts of interest.

## 12 **Data Sharing Statement**

13 No additional unpublished data are available.

## 14 **Acknowledgements**

15 We are grateful to the staff of MMT clinics in the study site for their valuable assistance in subject  
16 recruitment and data collection. We appreciate the HIV-positive MMT participants spending time and  
17 sharing with us regarding their information.

18

**References:**

1. Zhao M, Ling W. HIV/AIDS and Drug Use in China—Interactions, Impacts, and Issues. *Substance Use & Misuse*. 2012; 47: 1015-1025.
2. The State Council Information Office of the People's Republic of China. 2014 annual report on drug situation in China., 2014.
3. Jia M, Luo H, Ma Y, Wang N, Smith K, Mei J, et al. The HIV epidemic in Yunnan Province, China, 1989-2007. *J Acquir Immune Defic Syndr*. 2010; 53 Suppl 1: S34-40.
4. Bao YP, Liu ZM. Systematic review of HIV and HCV infection among drug users in China. *International Journal of STD & AIDS*. 2009; 20: 399-405.
5. UNAIDS. 2014 China AIDS Response Progress Report., 2014.
6. Wu Z. Landmark government methadone maintenance program in mainland China. "15<sup>th</sup> International AIDS Conference", 2004.
7. Yin W, Hao Y, Sun X, Gong X, Li F, Li J, et al. Scaling up the national methadone maintenance treatment program in China: achievements and challenges. *International Journal of Epidemiology*. 2010; 39: ii29-ii37.
8. Zou X, Ling L, Zhang L. Trends and risk factors for HIV, HCV and syphilis seroconversion among drug users in a methadone maintenance treatment programme in China: a 7-year retrospective cohort study. *BMJ Open*. 2015; 5: e008162.
9. Dai J, Zhao L, Liang Y. Policy implementation of methadone maintenance treatment and HIV infection: evidence from Hubei province, China. *Subst Abuse Treat Prev Policy*. 2013; 8: 38.
10. Sun HM, Li XY, Chow EPF, Li T, Xian Y, Lu YH, et al. Methadone maintenance treatment programme reduces criminal activity and improves social well-being of drug users in China: a

- 1  
2  
3  
4 1 systematic review and meta-analysis. *BMJ Open*. 2015; 5: e005997-e005997.
- 5  
6 11. Zhao Y, Shi CX, McGoogan JM, Rou K, Zhang F, Wu Z. Methadone maintenance treatment and  
7  
8 mortality in HIV-positive people who inject opioids in China. *Bulletin of the World Health*  
9  
10 *Organization*. 2013; 91: 93-101.
- 11  
12 12. Reddon H, Milloy MJ, Simo A, Montaner J, Wood E, Kerr T. Methadone Maintenance Therapy  
13  
14 Decreases the Rate of Antiretroviral Therapy Discontinuation Among HIV-Positive Illicit Drug  
15  
16 Users. *AIDS and Behavior*. 2014; 18: 740-746.
- 17  
18  
19 13. National Health And Family Planning Commission Of PRC. The national health and family  
20  
21 planning commission published online., 2015.
- 22  
23 14. Wang R, Ding Y, Bai H, Duan S, Ye R, Yang Y, et al. Illicit Heroin and Methamphetamine Use  
24  
25 among Methadone Maintenance Treatment Patients in Dehong Prefecture of Yunnan Province,  
26  
27 China. *PLOS ONE*. 2015; 10: e0133431.
- 28  
29 15. Sullivan SG, Wu Z, Cao X, Liu E, Detels R. Continued drug use during methadone treatment in  
30  
31 China: A retrospective analysis of 19,026 service users. *Journal of Substance Abuse Treatment*.  
32  
33 2014; 47: 86-92.
- 34  
35 16. Li L, Lin C, Wan D, Zhang L, Lai W. Concurrent heroin use among methadone maintenance clients  
36  
37 in China. *Addictive Behaviors*. 2012; 37: 264-268.
- 38  
39 17. Zhang L, Chow EP, Zhuang X, Liang Y, Wang Y, Tang C, et al. Methadone maintenance treatment  
40  
41 participant retention and behavioural effectiveness in China: a systematic review and meta-analysis.  
42  
43 *PLoS One*. 2013; 8: e68906.
- 44  
45 18. Leri F, Bruneau J, Stewart J. Understanding polydrug use: review of heroin and cocaine co-use.  
46  
47 *Addiction*. 2003; 98: 7-22.
- 48  
49  
50  
51  
52  
53  
54  
55  
56  
57  
58  
59  
60

- 1  
2  
3  
4 19. Jimenez-Treviño L, Saiz PA, García-Portilla MP, Díaz-Mesa EM, Sánchez-Lasheras F, Burón P, et  
5  
6 al. A 25-year follow-up of patients admitted to methadone treatment for the first time: Mortality  
7  
8 and gender differences. *Addictive Behaviors*. 2011; 36: 1184-1190.
- 9  
10  
11 20. McCowan C, Kidd B, Fahey T. Factors associated with mortality in Scottish patients receiving  
12  
13 methadone in primary care: retrospective cohort study. *BMJ*. 2009; 338: b2225.
- 14  
15  
16 21. Darke S, Ross J, Hall W. Overdose among heroin users in Sydney, Australia: II. responses to  
17  
18 overdose. *Addiction*. 1996; 91: 413-7.
- 19  
20  
21 22. Darke S, Ross J, Hall W. Overdose among heroin users in Sydney, Australia: I. Prevalence and  
22  
23 correlates of non-fatal overdose. *Addiction*. 1996; 91: 405-11.
- 24  
25  
26 23. Green TC, McGowan SK, Yokell MA, Pouget ER, Rich JD. HIV infection and risk of overdose: a  
27  
28 systematic review and meta-analysis. *AIDS*. 2012; 26: 403-417.
- 29  
30  
31 24. Jiang H, Cao X, Wang C, Luo W, Li J, Rou K, et al. Study on the adherence and related  
32  
33 determinants among HIV-positive clients under methadone maintenance treatment in Dali, Yunnan  
34  
35 province from 2005 to 2013. *Chin J Epidemiol*. 2014; 35: 255-258.
- 36  
37  
38 25. Luo X, Zhao P, Gong X, Zhang L, Tang W, Zou X, et al. Concurrent Heroin Use and Correlates  
39  
40 among Methadone Maintenance Treatment Clients: A 12-Month Follow-up Study in Guangdong  
41  
42 Province, China. *International Journal of Environmental Research and Public Health*. 2016; 13:  
43  
44 305.
- 45  
46  
47  
48  
49 26. NetEase. Guangdong had cumulatively reported 48,718 HIV-infected individuals, ranking fifth  
50  
51 position in China., 2014.
- 52  
53  
54 27. China. Org. Cn. Guangdong has the largest number of registered drug users (457,000), accounting  
55  
56 for one-sixth of the total registered drug users of China., 2014.
- 57  
58  
59  
60

- 1  
2  
3  
4 1 28. Zhang L, Zou X, Zhang D, Li X, Zhao P, Ling L. Investigation of Repeat Client Drop-Out and  
5  
6 Re-Enrolment Cycles in Fourteen Methadone Maintenance Treatment Clinics in Guangdong, China.  
7  
8 PLOS ONE. 2015; 10: e0139942.  
9  
10  
11 29. Rodriguez-Penney AT, Iudicello JE, Riggs PK, Doyle K, Ellis RJ, Letendre SL, et al.  
12  
13 Co-Morbidities in Persons Infected with HIV: Increased Burden with Older Age and Negative  
14  
15 Effects on Health-Related Quality of Life. AIDS Patient Care and STDs. 2013; 27: 5-16.  
16  
17  
18 30. Tsao JC, Plankey MW, Young MA. Pain, psychological symptoms and prescription drug misuse in  
19  
20 HIV: A literature review. J Pain Manag. 2012; 5: 111-118.  
21  
22  
23 31. Edelman EJ, Gordon K, Becker WC, Goulet JL, Skanderson M, Gaither JR, et al. Receipt of opioid  
24  
25 analgesics by HIV-infected and uninfected patients. J Gen Intern Med. 2013; 28: 82-90.  
26  
27  
28 32. Sherr L, Clucas C, Harding R, Sibley E, Catalan J. HIV and Depression - a systematic review of  
29  
30 interventions. PSYCHOLOGY HEALTH & MEDICINE. 2011; 16: 493-527.  
31  
32  
33 33. Wang P, Lin H, Yen C, Yeh Y, Hsu C, Chung K, et al. Comparison of outcomes after 3-month  
34  
35 methadone maintenance treatment between heroin users with and without HIV infection: a 3-month  
36  
37 follow-up study. Harm Reduction Journal. 2015; 12.  
38  
39  
40 34. Liu H, Li J, Lu Z, Liu W, Zhang Z. Does Chinese culture influence psychosocial factors for heroin  
41  
42 use among young adolescents in China? A cross-sectional study. BMC Public Health. 2010; 10:  
43  
44 563.  
45  
46  
47 35. Xu H, Gu J, Lau JTF, Zhong Y, Fan L, Zhao Y, et al. Misconceptions toward methadone  
48  
49 maintenance treatment (MMT) and associated factors among new MMT users in Guangzhou,  
50  
51 China. Addictive Behaviors. 2012; 37: 657-662.  
52  
53  
54 36. Cao XB, Yin WY, Pang L, Zhang CB, Xu JS, Xiao YK, et al. Risk factors which were associated  
55  
56  
57  
58  
59  
60



- 1  
2  
3  
4 1 with heroin use during the methadone maintenance treatment among 1301 patients in 9 cities of  
5  
6 2 China. *Zhonghua Liu Xing Bing Xue Za Zhi*. 2010; 31: 269-72.
- 7  
8  
9 3 37. Lin C, Wu Z, Detels R. Family support, quality of life and concurrent substance use among  
10  
11 4 methadone maintenance therapy clients in China. *Public Health*. 2011; 125: 269-274.
- 12  
13 5 38. Amato L, Davoli M, Perucci CA, Ferri M, Faggiano F, Mattick RP. An overview of systematic  
14  
15 6 reviews of the effectiveness of opiate maintenance therapies: available evidence to inform clinical  
16  
17 7 practice and research. *Journal of Substance Abuse Treatment*. 2005; 28: 321-329.
- 18  
19  
20 8 39. Dole VP, Nyswander ME, Kreek MJ. Narcotic blockade. 1966. *J Psychoactive Drugs*. 1991; 23:  
21  
22 9 following 232.
- 23  
24  
25 10 40. Cooper JR. Ineffective use of psychoactive drugs. Methadone treatment is no exception. *Jama the*  
26  
27 11 *Journal of the American Medical Association*. 1992; 267: 281-2.
- 28  
29  
30 12 41. Cao XB, Yin WY, Pang L, Zhang CB, Xu JS, Xiao YK, et al. Risk factors which were associated  
31  
32 13 with heroin use during the methadone maintenance treatment among 1301 patients in 9 cities of  
33  
34 14 China. *Zhonghua Liu Xing Bing Xue Za Zhi*. 2010; 31: 269-72.
- 35  
36  
37 15 42. Brown BS, Watters JK, Iglehart AS. Methadone maintenance dosage levels and program retention.  
38  
39 16 *Am J Drug Alcohol Abuse*. 1982; 9: 129-139.
- 40  
41  
42 17 43. Conference NC. Effective medical treatment of opiate addiction. National Consensus Development  
43  
44 18 Panel on Effective Medical Treatment of Opiate Addiction. *JAMA*. 1998; 280: 1936-43.
- 45  
46  
47 19 44. Liu E, Rou K, McGoogan JM, Pang L, Cao X, Wang C, et al. Factors Associated With Mortality of  
48  
49 20 HIV-Positive Clients Receiving Methadone Maintenance Treatment in China. *Journal of Infectious*  
50  
51 21 *Diseases*. 2013; 208: 442-453.
- 52  
53  
54  
55  
56 22 45. Mattick RP, Breen C, Kimber J, Davoli M. Methadone maintenance therapy versus no opioid  
57  
58  
59  
60

- 1 replacement therapy for opioid dependence. Cochrane Database Syst Rev. 2009CD002209.
- 2
- 3
- 4 1 replacement therapy for opioid dependence. Cochrane Database Syst Rev. 2009CD002209.
- 5
- 6 46. Che Y, Assanangkornchai S, McNeil E, Li J, You J, Chongsuvivatwong V. Patterns of attendance
- 7
- 8 in methadone maintenance treatment program in Yunnan Province, China. The American Journal
- 9
- 10 of Drug and Alcohol Abuse. 2011; 37: 148-154.
- 11
- 12
- 13 47. Gu J, Xu H, Lau JTF, Hao Y, Zhong Y, Fan L, et al. Misconceptions predict dropout and poor
- 14
- 15 adherence prospectively among newly admitted first-time methadone maintenance treatment clients
- 16
- 17 in Guangzhou, China. Addiction. 2012; 107: 1641-1649.
- 18
- 19
- 20
- 21
- 22
- 23
- 24
- 25
- 26
- 27
- 28
- 29
- 30
- 31
- 32
- 33
- 34
- 35
- 36
- 37
- 38
- 39
- 40
- 41
- 42
- 43
- 44
- 45
- 46
- 47
- 48
- 49
- 50
- 51
- 52
- 53
- 54
- 55
- 56
- 57
- 58
- 59
- 60

## 1 Tables

## 2 Table1. Characteristics of the participants (n=293)

| Characteristics                               | Urine Morphine(-)     | Urine Morphine(+)     | Total                 |
|-----------------------------------------------|-----------------------|-----------------------|-----------------------|
|                                               | (n=25)                | (n=268)               | (N=293)               |
|                                               | No. (% <sup>a</sup> ) | No. (% <sup>a</sup> ) | No. (% <sup>b</sup> ) |
| Age at Baseline (years)                       |                       |                       |                       |
| ≤30                                           | 5(7.5)                | 62(92.5)              | 67(22.9)              |
| 31-                                           | 9(10.1)               | 80(89.9)              | 89(30.4)              |
| 36-                                           | 7(7.8)                | 83(92.2)              | 90(30.7)              |
| ≥41                                           | 4(8.5)                | 43(91.5)              | 47(16.0)              |
| Gender                                        |                       |                       |                       |
| Male                                          | 25(9.3)               | 243(90.7)             | 268(91.5)             |
| Female                                        | 0(0)                  | 25(100.0)             | 25(8.5)               |
| Ethnic                                        |                       |                       |                       |
| Han                                           | 25(8.6)               | 266(91.4)             | 291(99.3)             |
| Others                                        | 0(0)                  | 2(100.0)              | 2(0.7)                |
| Marital Status at Baseline                    |                       |                       |                       |
| Never married                                 | 17(10.7)              | 142(89.3)             | 159(54.3)             |
| Married currently                             | 5(5.2)                | 92(94.8)              | 97(33.1)              |
| Others                                        | 3(8.1)                | 34(91.9)              | 37(12.6)              |
| Education Level                               |                       |                       |                       |
| Elementary or lower                           | 1(1.6)                | 63(98.4)              | 64(21.8)              |
| Juniorhigh school                             | 18(9.4)               | 174(90.6)             | 192(65.5)             |
| Senior high school or higher                  | 6(16.2)               | 31(83.8)              | 37(12.6)              |
| Employed Status at Baseline                   |                       |                       |                       |
| Unemployed                                    | 16(7.9)               | 186(92.1)             | 202(68.9)             |
| Employed                                      | 9(9.9)                | 82(90.1)              | 91(31.1)              |
| Mainly Financial Sources at Baseline          |                       |                       |                       |
| Family or friends                             | 19(10.1)              | 169(89.9)             | 188(64.2)             |
| Others                                        | 6(5.7)                | 99(94.3)              | 105(35.8)             |
| Duration of Drug Abuse (years)                |                       |                       |                       |
| ≤10                                           | 3(4.6)                | 62(95.4)              | 65(22.2)              |
| 11-15                                         | 12(9.2)               | 118(90.8)             | 130(44.4)             |
| ≥16                                           | 10(10.2)              | 88(89.8)              | 98(33.4)              |
| Type of Drug Use at Baseline                  |                       |                       |                       |
| Heroin                                        | 25(8.7)               | 264(91.3)             | 289(98.6)             |
| Others                                        | 0(0)                  | 4(100.0)              | 4(1.4)                |
| Intravenous Drug Use at Baseline              |                       |                       |                       |
| Yes                                           | 25(8.6)               | 265(91.4)             | 290(99.0)             |
| No                                            | 0(0)                  | 3(100.0)              | 3(1.0)                |
| Shared Needles to Inject Drugs at Baseline    |                       |                       |                       |
| Yes                                           | 11(6.7)               | 153(93.3)             | 164(56.6)             |
| No                                            | 14(11.1)              | 112(88.9)             | 126(43.4)             |
| Average Times of Drug Use per Day at Baseline |                       |                       |                       |

|                                    |          |           |           |
|------------------------------------|----------|-----------|-----------|
| ≤2                                 | 10(8.4)  | 109(91.6) | 119(40.6) |
| ≥3                                 | 15(8.6)  | 159(91.4) | 174(59.4) |
| Multiple Sex Partners at Baseline  |          |           |           |
| Yes                                | 4(6.3)   | 59(93.7)  | 63(21.5)  |
| No                                 | 21(9.1)  | 209(90.9) | 230(78.5) |
| Average Maintenance Doses (ml/day) |          |           |           |
| ≥60                                | 18(11.5) | 138(88.5) | 156(53.2) |
| <60                                | 7(5.1)   | 130(94.9) | 137(46.8) |
| Percentages of MMT Attendance (%)  |          |           |           |
| <20                                | 1(3.2)   | 30(96.8)  | 31(10.6)  |
| 20-                                | 4(6.1)   | 62(93.9)  | 66(22.5)  |
| 50-                                | 4(5.2)   | 73(94.8)  | 77(26.3)  |
| ≥80%                               | 16(13.4) | 103(86.6) | 119(40.6) |

<sup>a</sup> calculated by row, <sup>b</sup> calculated by column.

1 Table 2 Urine morphine tests results at the different entrant year and followed month (n=293)

| Year  | Positive percentage of urine morphine tests by month (% , n/N) |               |               |               |               |               |               |               |               |               |               |               | Median (IQR)    |
|-------|----------------------------------------------------------------|---------------|---------------|---------------|---------------|---------------|---------------|---------------|---------------|---------------|---------------|---------------|-----------------|
|       | 1                                                              | 2             | 3             | 4             | 5             | 6             | 7             | 8             | 9             | 10            | 11            | 12            |                 |
| 2006  | 97.1(34/35)                                                    | 48.6(17/35)   | 45.7(16/35)   | 37.1(13/35)   | 60.0(21/35)   | 45.7(16/35)   | 54.3(19/35)   | 48.6(17/35)   | 54.3(19/35)   | 60.0(21/35)   | 37.5(12/32)   | 46.9(15/32)   | 48.6(45.7-58.6) |
| 2007  | 92.3(72/78)                                                    | 55.1(43/78)   | 50.0(39/78)   | 43.6(34/78)   | 47.4(37/78)   | 51.3(40/78)   | 50.0(39/78)   | 42.3(33/78)   | 50.0(39/78)   | 46.2(36/78)   | 44.4(32/72)   | 44.3(31/70)   | 48.7(44.3-51.0) |
| 2008  | 96.6(56/58)                                                    | 50.0(29/58)   | 46.6(27/58)   | 48.3(28/58)   | 51.7(30/58)   | 41.4(24/58)   | 34.5(20/58)   | 39.7(23/58)   | 39.7(23/58)   | 39.7(23/58)   | 39.7(23/58)   | 49.1(28/57)   | 44.0(39.7-49.8) |
| 2009  | 97.7(42/43)                                                    | 62.8(27/43)   | 41.9(18/43)   | 41.9(18/43)   | 58.1(25/43)   | 39.5(17/43)   | 44.2(19/43)   | 27.9(12/43)   | 37.2(12/43)   | 37.2(16/43)   | 40.5(17/42)   | 31.7(13/41)   | 41.2(37.2-54.6) |
| 2010  | 96.7(29/30)                                                    | 50.0(15/30)   | 53.3(16/30)   | 50.0(15/30)   | 40.0(12/30)   | 40.0(12/30)   | 43.3(13/30)   | 43.3(13/30)   | 46.7(14/30)   | 40.0(12/30)   | 35.7(10/28)   | 37.0(10/27)   | 43.3(40.0-50.0) |
| 2011  | 100.0(38/38)                                                   | 55.3(21/38)   | 47.4(18/38)   | 42.1(16/38)   | 39.5(15/38)   | 42.1(16/38)   | 57.9(22/38)   | 44.7(17/38)   | 44.7(17/38)   | 42.1(16/38)   | 36.4(12/33)   | 41.9(13/31)   | 43.4(42.0-53.3) |
| 2012  | 90.0(10/11)                                                    | 45.5(5/11)    | 9.1(1/11)     | 9.1(1/11)     | 27.3(3/11)    | 27.3(3/11)    | 18.2(2/11)    | 27.3(3/11)    | 9.1(1/11)     | 18.2(2/11)    | 20.0(2/10)    | 25.0(2/8)     | 22.5(11.4-27.3) |
| Total | 95.9(281/293)                                                  | 53.6(157/293) | 46.1(135/293) | 42.7(125/293) | 48.8(143/293) | 43.7(128/293) | 45.7(134/293) | 40.3(118/293) | 42.7(125/293) | 43.0(126/293) | 39.3(108/275) | 42.1(112/266) | 43.4(40.0-51.0) |

2

1 Table 3 The distribution of positive percentages of urine morphine tests among the urine morphine  
2 (+) participants during the study period (n =268)

| Positive percentage (%) | Number (n) | Percentage (%) |
|-------------------------|------------|----------------|
| <10                     | 34         | 12.7           |
| 10-                     | 34         | 12.7           |
| 20-                     | 29         | 10.8           |
| 30-                     | 28         | 10.4           |
| 40-                     | 22         | 8.2            |
| 50-                     | 18         | 6.7            |
| 60-                     | 23         | 8.6            |
| 70-                     | 20         | 7.5            |
| 80-                     | 22         | 8.2            |
| 90-                     | 38         | 14.2           |
| total                   | 268        | 100.0          |

3

4

1 Table4. Correlates of higher positive percentages among urine morphine (+) participants during  
 2 the study period (n=268)

| Characteristics                           | <20%<br>(n=68)<br>No. (%)* | 20%-60%<br>(n=97)<br>No. (%)* | >60%<br>(n=103)<br>No. (%)* | OR(95%CI) <sup>a, b</sup> | <i>p</i> <sup>b</sup> |
|-------------------------------------------|----------------------------|-------------------------------|-----------------------------|---------------------------|-----------------------|
| <b>Age (years)</b>                        |                            |                               |                             |                           |                       |
| ≤30                                       | 20(32.3)                   | 28(45.2)                      | 14(22.6)                    | 0.31(0.12-0.78)           | <b>0.013</b>          |
| 31-                                       | 22(27.5)                   | 26(32.5)                      | 32(40.0)                    | 0.44(0.20-1.00)           | <b>0.051</b>          |
| 36-                                       | 13(15.7)                   | 33(39.8)                      | 37(44.6)                    | 0.91(0.43-1.93)           | 0.814                 |
| ≥41                                       | 13(30.2)                   | 10(23.3)                      | 20(46.5)                    | 1.00                      |                       |
| <b>Gender</b>                             |                            |                               |                             |                           |                       |
| Male                                      | 60(24.7)                   | 90(37.0)                      | 93(38.3)                    | 0.97(0.42-2.22)           | 0.944                 |
| Female                                    | 8(32.0)                    | 7(28.0)                       | 10(40.0)                    | 1.00                      |                       |
| <b>Marital Status</b>                     |                            |                               |                             |                           |                       |
| Never married                             | 36(25.4)                   | 54(38.0)                      | 52(36.6)                    | 2.04(0.92-4.55)           | 0.080                 |
| Married Currently                         | 23(25.0)                   | 29(31.5)                      | 40(43.5)                    | 1.93(0.85-4.40)           | 0.117                 |
| Others                                    | 9(26.5)                    | 14(41.2)                      | 11(32.4)                    | 1.00                      |                       |
| <b>Education Level</b>                    |                            |                               |                             |                           |                       |
| Elementary or lower                       | 16(25.4)                   | 24(38.1)                      | 23(36.5)                    | 1.50(0.64-3.50)           | 0.347                 |
| Juniorhigh school                         | 45(25.9)                   | 58(33.3)                      | 71(40.8)                    | 1.48(0.71-3.12)           | 0.298                 |
| Senior high school or higher              | 7(22.6)                    | 15(48.4)                      | 9(29.0)                     | 1.00                      |                       |
| <b>Employment Status at Baseline</b>      |                            |                               |                             |                           |                       |
| Unemployed                                | 45(24.2)                   | 64(34.4)                      | 77(41.4)                    | 1.99(1.13-3.49)           | <b>0.017</b>          |
| Employed                                  | 23(28.0)                   | 33(40.2)                      | 26(31.7)                    | 1.00                      |                       |
| <b>Mainly Financial Sources</b>           |                            |                               |                             |                           |                       |
| Family or friends                         | 49(29.0)                   | 60(35.5)                      | 60(35.5)                    | 0.55(0.32-0.93)           | <b>0.025</b>          |
| Others                                    | 19(19.2)                   | 37(37.4)                      | 43(43.4)                    | 1.00                      |                       |
| <b>Duration of Drug Abuse (years)</b>     |                            |                               |                             |                           |                       |
| ≤10                                       | 18(29.0)                   | 21(33.9)                      | 23(37.1)                    | 1.04(0.50-2.16)           | 0.923                 |
| 11-15                                     | 27(22.9)                   | 46(39.0)                      | 45(38.1)                    | 1.38(0.75-2.55)           | 0.305                 |
| ≥16                                       | 23(26.1)                   | 30(34.1)                      | 35(39.8)                    | 1.00                      |                       |
| <b>Average Times of Drug Use per Day</b>  |                            |                               |                             |                           |                       |
| ≤2                                        | 21(19.3)                   | 47(43.1)                      | 41(37.6)                    | 1.03(0.62-1.71)           | 0.912                 |
| ≥3                                        | 47(29.6)                   | 50(31.4)                      | 62(39.0)                    | 1.00                      |                       |
| <b>Shared Needles at Baseline</b>         |                            |                               |                             |                           |                       |
| Yes                                       | 38(24.8)                   | 59(38.6)                      | 56(36.6)                    | 1.03(0.63-1.69)           | 0.902                 |
| No                                        | 30(26.1)                   | 38(33.0)                      | 47(40.9)                    | 1.00                      |                       |
| <b>Multiple Sex Partners at Baseline</b>  |                            |                               |                             |                           |                       |
| Yes                                       | 12 (20.3)                  | 17(28.8)                      | 30(50.8)                    | 1.65(0.89-3.05)           | 0.113                 |
| No                                        | 56(26.8)                   | 80(38.3)                      | 73(34.9)                    | 1.00                      |                       |
| <b>Average Maintenance Doses (ml/day)</b> |                            |                               |                             |                           |                       |
| ≥60                                       | 36(26.1)                   | 56(40.6)                      | 46(33.3)                    | 0.92(0.57-1.49)           | 0.742                 |
| <60                                       | 32(24.6)                   | 41(31.5)                      | 57(43.8)                    | 1.00                      |                       |
| <b>Percentages of MMT Attendance (%)</b>  |                            |                               |                             |                           |                       |

|      |          |          |          |                 |              |
|------|----------|----------|----------|-----------------|--------------|
| <20  | 4(13.3)  | 9(30.0)  | 17(56.7) | 3.60(1.55-8.33) | <b>0.003</b> |
| 20-  | 10(16.1) | 19(30.6) | 33(53.2) | 2.80(1.48-5.33) | <b>0.002</b> |
| 50-  | 22(30.1) | 32(43.8) | 19(26.0) | 0.94(0.53-1.67) | 0.841        |
| ≥80% | 32(31.1) | 37(35.9) | 34(33.0) | 1.00            |              |

1 <sup>a</sup> OR: Odds Ratio, CI: Confidence Interval;

2 <sup>b</sup> Obtained from multivariate ordinal logistic regression analysis adjusting for potential confounding variables  
 3 listed in the table;

4 \*Proportions were calculated in the row.

For peer review only

1  
2  
3  
4  
5  
6  
7  
8  
9  
10  
11  
12  
13  
14  
15  
16  
17  
18  
19  
20  
21  
22  
23  
24  
25  
26  
27  
28  
29  
30  
31  
32  
33  
34  
35  
36  
37  
38  
39  
40  
41  
42  
43  
44  
45  
46  
47  
48  
49  
50  
51  
52  
53  
54  
55  
56  
57  
58  
59  
60



1 Table5. Self-reported risk behaviors among urine morphine (+) participants during the study  
 2 period (n=266)

| Characteristics               | <20%                  | 20%-60%               | >60%                  | Total                 |
|-------------------------------|-----------------------|-----------------------|-----------------------|-----------------------|
|                               | No. (% <sup>a</sup> ) | No. (% <sup>a</sup> ) | No. (% <sup>a</sup> ) | No. (% <sup>b</sup> ) |
| Drug Use (n=266)              |                       |                       |                       |                       |
| Yes                           | 26(15.6)              | 55(32.9)              | 86(51.5)              | 167(62.8)             |
| No                            | 41(41.4)              | 41(41.4)              | 17(17.2)              | 99(37.2)              |
| Injected Drugs (n=167)        |                       |                       |                       |                       |
| Yes                           | 21(14.8)              | 44(31.0)              | 77(54.2)              | 142(85.0)             |
| No                            | 5(20.0)               | 11(44.0)              | 9(36.0)               | 25(15.0)              |
| Shared Needles (n=142)        |                       |                       |                       |                       |
| Yes                           | 3(8.3)                | 11(30.6)              | 22(61.1)              | 36(25.4)              |
| No                            | 18(17.0)              | 33(31.1)              | 55(51.9)              | 106(74.6)             |
| Sex Activity (n=266)          |                       |                       |                       |                       |
| Yes                           | 38(22.6)              | 66(39.3)              | 64(38.1)              | 168(63.2)             |
| No                            | 29(29.6)              | 30(30.6)              | 39(39.8)              | 98(36.8)              |
| Multiple Sex Partners (n=168) |                       |                       |                       |                       |
| Yes                           | 7(14.3)               | 23(46.9)              | 19(38.8)              | 49(29.2)              |
| No                            | 31(26.1)              | 43(36.1)              | 45(37.8)              | 119(70.8)             |
| Condom Use (n=168)            |                       |                       |                       |                       |
| Yes                           | 24(25.3)              | 37(38.9)              | 34(35.8)              | 95(56.5)              |
| No                            | 14(19.2)              | 29(39.7)              | 30(41.1)              | 73(43.5)              |
| Sex for Drugs (n=117)         |                       |                       |                       |                       |
| Yes                           | 3(17.6)               | 8(47.1)               | 6(35.3)               | 17(14.5)              |
| No                            | 18(18.0)              | 32(32.0)              | 50(50.0)              | 100(85.5)             |

3 <sup>a</sup> calculated by row, <sup>b</sup> calculated by column.

4

5

## STROBE Statement—checklist of items that should be included in reports of observational studies

|                              | Item No | Recommendation                                                                                                                                                                                                                                                                                                                                                                                                                                                                                                                                                                                                                                                                                                                                                   |
|------------------------------|---------|------------------------------------------------------------------------------------------------------------------------------------------------------------------------------------------------------------------------------------------------------------------------------------------------------------------------------------------------------------------------------------------------------------------------------------------------------------------------------------------------------------------------------------------------------------------------------------------------------------------------------------------------------------------------------------------------------------------------------------------------------------------|
| <b>Title and abstract</b>    | 1       | (a) Indicate the study's design with a commonly used term in the title or the abstract<br><a href="#">In the title</a><br>(b) Provide in the abstract an informative and balanced summary of what was done and what was found<br><a href="#">Line 7-8,page 2; line 9-16,page 2</a>                                                                                                                                                                                                                                                                                                                                                                                                                                                                               |
| <b>Introduction</b>          |         |                                                                                                                                                                                                                                                                                                                                                                                                                                                                                                                                                                                                                                                                                                                                                                  |
| Background/rationale         | 2       | Explain the scientific background and rationale for the investigation being reported<br><a href="#">Line 19-22, page 4; line 1-4, page 5</a>                                                                                                                                                                                                                                                                                                                                                                                                                                                                                                                                                                                                                     |
| Objectives                   | 3       | State specific objectives, including any prespecified hypotheses<br><a href="#">Line 5-8, page 5</a>                                                                                                                                                                                                                                                                                                                                                                                                                                                                                                                                                                                                                                                             |
| <b>Methods</b>               |         |                                                                                                                                                                                                                                                                                                                                                                                                                                                                                                                                                                                                                                                                                                                                                                  |
| Study design                 | 4       | Present key elements of study design early in the paper<br><a href="#">Line 11-15,page 6</a>                                                                                                                                                                                                                                                                                                                                                                                                                                                                                                                                                                                                                                                                     |
| Setting                      | 5       | Describe the setting, locations, and relevant dates, including periods of recruitment, exposure, follow-up, and data collection<br><a href="#">Line 11-21,page 6</a>                                                                                                                                                                                                                                                                                                                                                                                                                                                                                                                                                                                             |
| Participants                 | 6       | (a) <i>Cohort study</i> —Give the eligibility criteria, and the sources and methods of selection of participants. Describe methods of follow-up<br><a href="#">Line 18-21, page 6; line 1-3,page 7</a><br><i>Case-control study</i> —Give the eligibility criteria, and the sources and methods of case ascertainment and control selection. Give the rationale for the choice of cases and controls<br><i>Cross-sectional study</i> —Give the eligibility criteria, and the sources and methods of selection of participants<br>(b) <i>Cohort study</i> —For matched studies, give matching criteria and number of exposed and unexposed<br>-----<br><i>Case-control study</i> —For matched studies, give matching criteria and the number of controls per case |
| Variables                    | 7       | Clearly define all outcomes, exposures, predictors, potential confounders, and effect modifiers. Give diagnostic criteria, if applicable<br><a href="#">line 4-22,page 7;line 1-15, page 8</a>                                                                                                                                                                                                                                                                                                                                                                                                                                                                                                                                                                   |
| Data sources/<br>measurement | 8*      | For each variable of interest, give sources of data and details of methods of assessment (measurement). Describe comparability of assessment methods if there is more than one group<br><a href="#">line 4-22,page 7;line 1-15, page 8</a>                                                                                                                                                                                                                                                                                                                                                                                                                                                                                                                       |
| Bias                         | 9       | Describe any efforts to address potential sources of bias<br><a href="#">Line 14-17,page 7; line 1-2,page 8</a>                                                                                                                                                                                                                                                                                                                                                                                                                                                                                                                                                                                                                                                  |
| Study size                   | 10      | Explain how the study size was arrived at<br><a href="#">Line 15-17, page 6</a>                                                                                                                                                                                                                                                                                                                                                                                                                                                                                                                                                                                                                                                                                  |
| Quantitative variables       | 11      | Explain how quantitative variables were handled in the analyses. If applicable, describe which groupings were chosen and why<br><a href="#">Line 19-21,page 7; line 1-6,page 8</a>                                                                                                                                                                                                                                                                                                                                                                                                                                                                                                                                                                               |

|    |                     |                                                                                            |
|----|---------------------|--------------------------------------------------------------------------------------------|
| 1  |                     |                                                                                            |
| 2  |                     |                                                                                            |
| 3  | Statistical methods | 12                                                                                         |
| 4  |                     | (a) Describe all statistical methods, including those used to control for confounding      |
| 5  |                     | <a href="#">Line 16-22, page 8</a>                                                         |
| 6  |                     | (b) Describe any methods used to examine subgroups and interactions                        |
| 7  |                     | (c) Explain how missing data were addressed                                                |
| 8  |                     | (d) <i>Cohort study</i> —If applicable, explain how loss to follow-up was addressed        |
| 9  |                     | <i>Case-control study</i> —If applicable, explain how matching of cases and controls was   |
| 10 |                     | addressed                                                                                  |
| 11 |                     | <i>Cross-sectional study</i> —If applicable, describe analytical methods taking account of |
| 12 |                     | sampling strategy                                                                          |
| 13 |                     | (e) Describe any sensitivity analyses                                                      |
| 14 |                     |                                                                                            |

Continued on next page

For peer review only

**Results**

|                  |     |                                                                                                                                                                                                                                                     |
|------------------|-----|-----------------------------------------------------------------------------------------------------------------------------------------------------------------------------------------------------------------------------------------------------|
| Participants     | 13* | (a) Report numbers of individuals at each stage of study—eg numbers potentially eligible, examined for eligibility, confirmed eligible, included in the study, completing follow-up, and analysed<br><a href="#">Line 15-17, page 6</a>             |
|                  |     | (b) Give reasons for non-participation at each stage                                                                                                                                                                                                |
|                  |     | (c) Consider use of a flow diagram                                                                                                                                                                                                                  |
| Descriptive data | 14* | (a) Give characteristics of study participants (eg demographic, clinical, social) and information on exposures and potential confounders<br><a href="#">Table 1, line 2-12, page 9</a>                                                              |
|                  |     | (b) Indicate number of participants with missing data for each variable of interest<br><a href="#">Table 1-5</a>                                                                                                                                    |
|                  |     | (c) <i>Cohort study</i> —Summarise follow-up time (eg, average and total amount)<br><a href="#">Line 22, page 6; Line 1-3, page 7</a>                                                                                                               |
| Outcome data     | 15* | <i>Cohort study</i> —Report numbers of outcome events or summary measures over time<br><a href="#">line 21-22, page 9</a>                                                                                                                           |
|                  |     | <i>Case-control study</i> —Report numbers in each exposure category, or summary measures of exposure                                                                                                                                                |
|                  |     | <i>Cross-sectional study</i> —Report numbers of outcome events or summary measures                                                                                                                                                                  |
| Main results     | 16  | (a) Give unadjusted estimates and, if applicable, confounder-adjusted estimates and their precision (eg, 95% confidence interval). Make clear which confounders were adjusted for and why they were included<br><a href="#">Table 4, page 26-27</a> |
|                  |     | (b) Report category boundaries when continuous variables were categorized<br><a href="#">Table 1, page 22-23</a>                                                                                                                                    |
|                  |     | (c) If relevant, consider translating estimates of relative risk into absolute risk for a meaningful time period                                                                                                                                    |
| Other analyses   | 17  | Report other analyses done—eg analyses of subgroups and interactions, and sensitivity analyses<br><a href="#">Line 10-15, page 10</a>                                                                                                               |

**Discussion**

|                  |    |                                                                                                                                                                                                                                                                                                 |
|------------------|----|-------------------------------------------------------------------------------------------------------------------------------------------------------------------------------------------------------------------------------------------------------------------------------------------------|
| Key results      | 18 | Summarise key results with reference to study objectives<br><a href="#">Line 7-8, page 11; line 12, page 11; line 1-2, page 12; line 6-7 page 12; line 16-18, page 12; line 22, page 12</a>                                                                                                     |
| Limitations      | 19 | Discuss limitations of the study, taking into account sources of potential bias or imprecision. Discuss both direction and magnitude of any potential bias<br><a href="#">Line 17-22, page 13; line 1-5, page 14</a>                                                                            |
| Interpretation   | 20 | Give a cautious overall interpretation of results considering objectives, limitations, multiplicity of analyses, results from similar studies, and other relevant evidence<br><a href="#">Line 9-11, page 11; line 13-19, page 11; line 2-4, page 12; line 6-10, page 12; line 1-6, page 13</a> |
| Generalisability | 21 | Discuss the generalisability (external validity) of the study results<br><a href="#">Line 6-12, page 14</a>                                                                                                                                                                                     |

**Other information**

|         |    |                                                                                                                                                                                                    |
|---------|----|----------------------------------------------------------------------------------------------------------------------------------------------------------------------------------------------------|
| Funding | 22 | Give the source of funding and the role of the funders for the present study and, if applicable, for the original study on which the present article is based<br><a href="#">Line 1-5, page 15</a> |
|---------|----|----------------------------------------------------------------------------------------------------------------------------------------------------------------------------------------------------|

1  
2  
3 \*Give information separately for cases and controls in case-control studies and, if applicable, for exposed and  
4 unexposed groups in cohort and cross-sectional studies.  
5  
6

7 **Note:** An Explanation and Elaboration article discusses each checklist item and gives methodological background and  
8 published examples of transparent reporting. The STROBE checklist is best used in conjunction with this article (freely  
9 available on the Web sites of PLoS Medicine at <http://www.plosmedicine.org/>, Annals of Internal Medicine at  
10 <http://www.annals.org/>, and Epidemiology at <http://www.epidem.com/>). Information on the STROBE Initiative is  
11 available at [www.strobe-statement.org](http://www.strobe-statement.org).  
12  
13  
14  
15  
16  
17  
18  
19  
20  
21  
22  
23  
24  
25  
26  
27  
28  
29  
30  
31  
32  
33  
34  
35  
36  
37  
38  
39  
40  
41  
42  
43  
44  
45  
46  
47  
48  
49  
50  
51  
52  
53  
54  
55  
56  
57  
58  
59  
60

For peer review only
